# Supplementary material for: High monoclonal neutralization titers reduced breakthrough HIV-1 viral loads in the Antibody Mediated Prevention trials
Source: PubMed Central journal article supplement (PMC10721814; doi:10.1038/s41467-023-43384-y), 2023-12-14

703-0015, IC80(Is)=100.0 $\mu$ g/mL

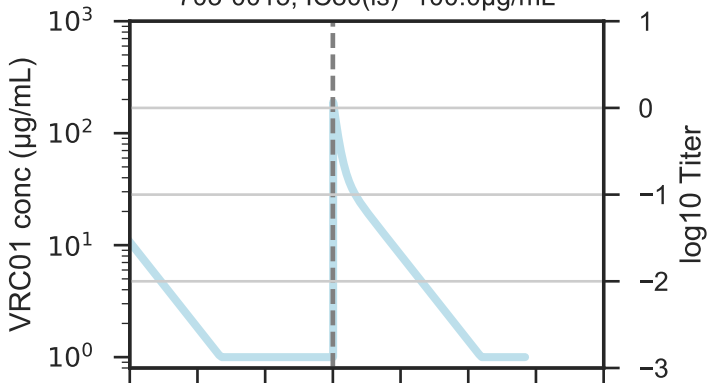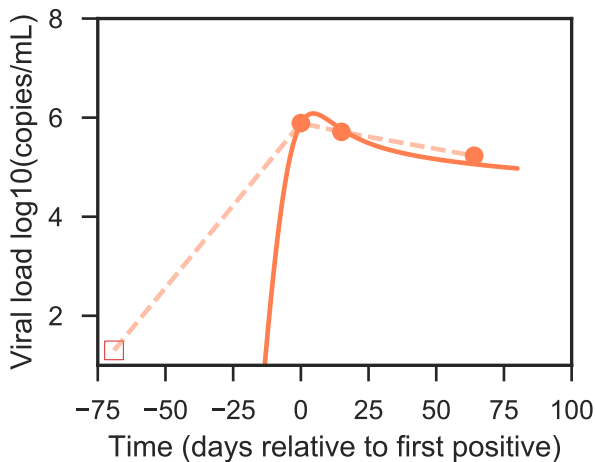

703-0109, IC80(Is)=4.46 $\mu$ g/mL

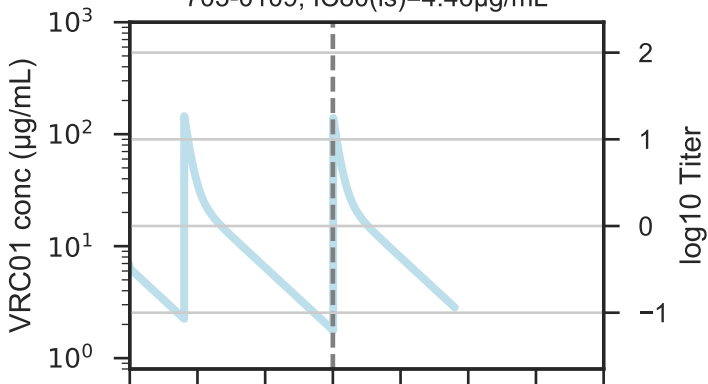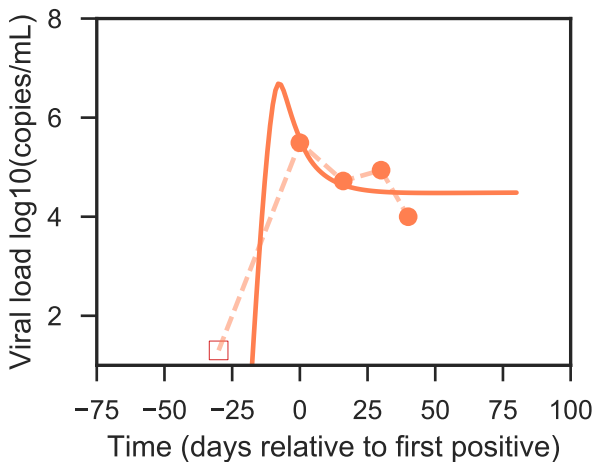

703-0132, IC80(Is)=100.0 $\mu$ g/mL

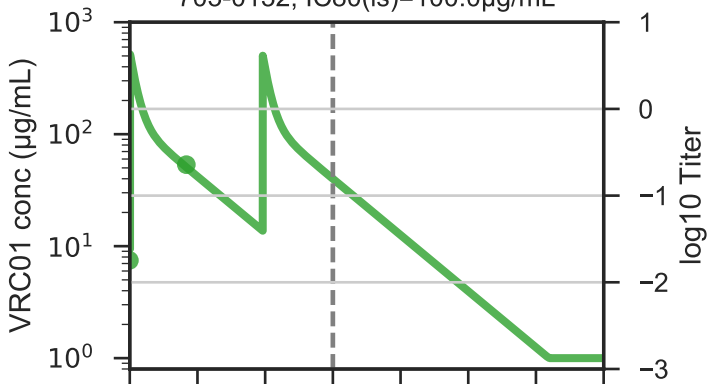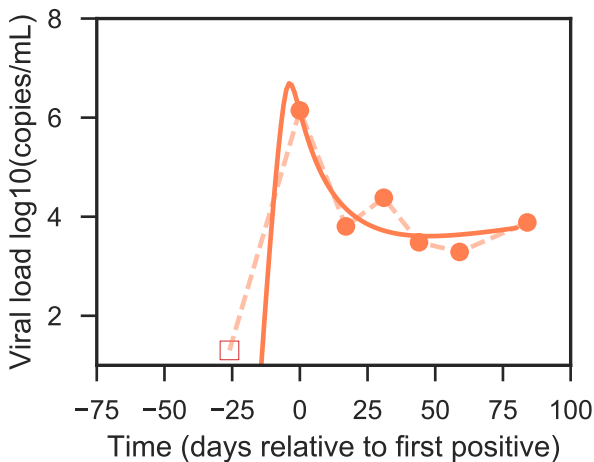

703-0157, IC80(Is)=100.0 $\mu$ g/mL

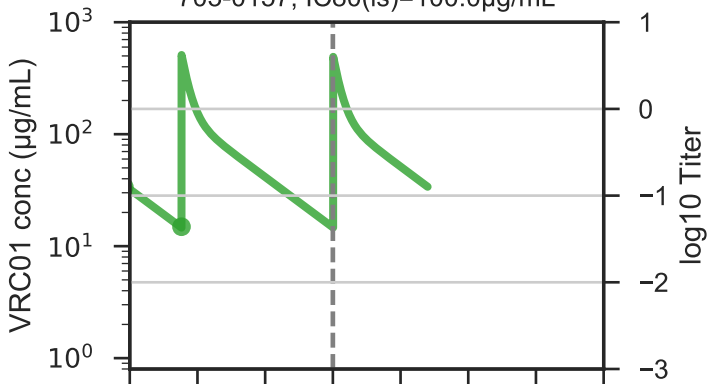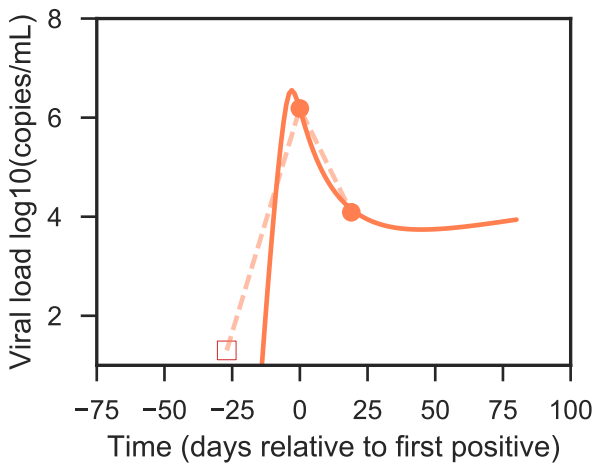

703-0309, IC80(Is)=1.78 $\mu$ g/mL

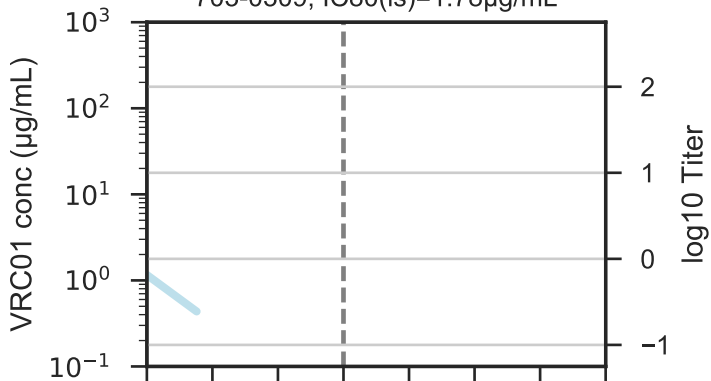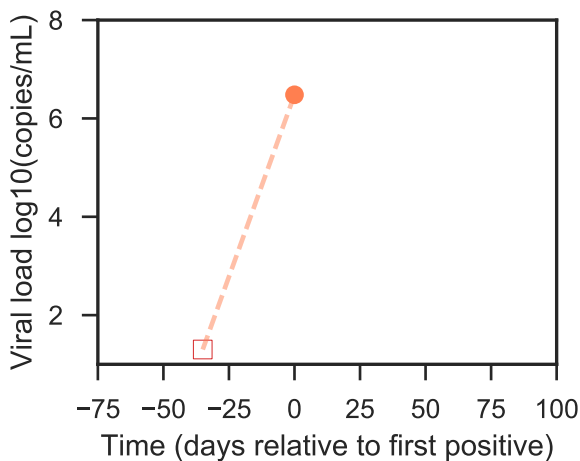

703-0322, IC80(Is)=4.62 $\mu$ g/mL

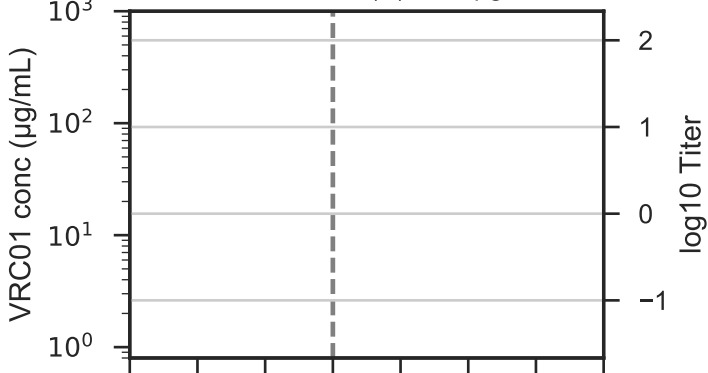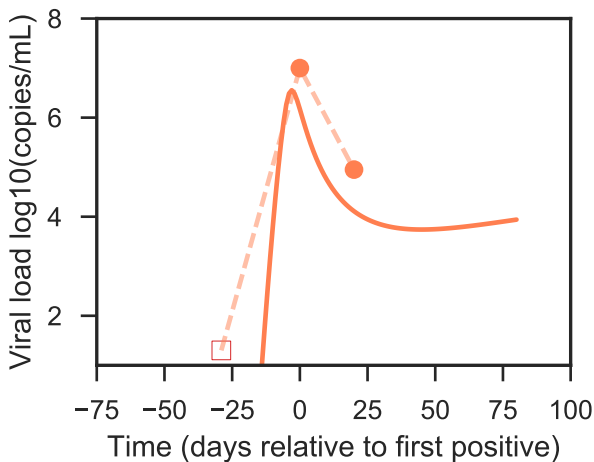

703-0455, IC80(Is)=100.0 $\mu$ g/mL

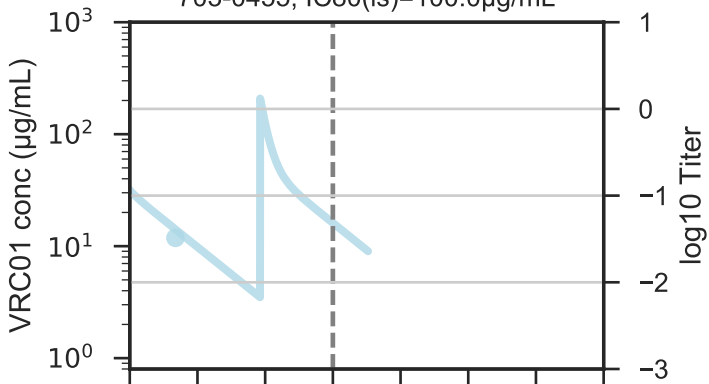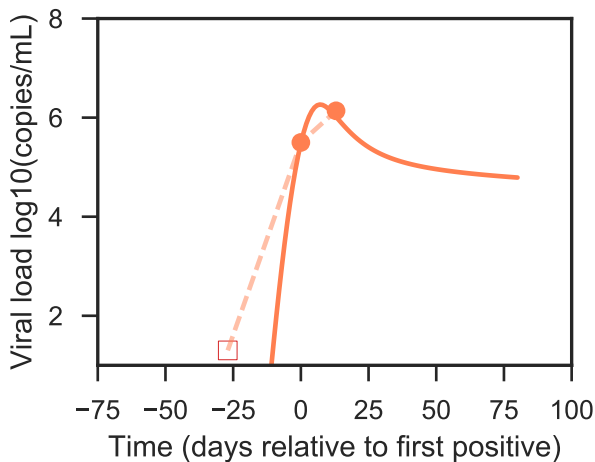

703-0514, IC80(Is)=100.0 $\mu$ g/mL

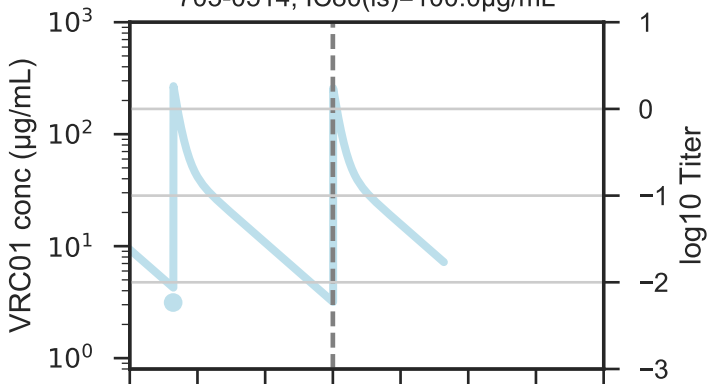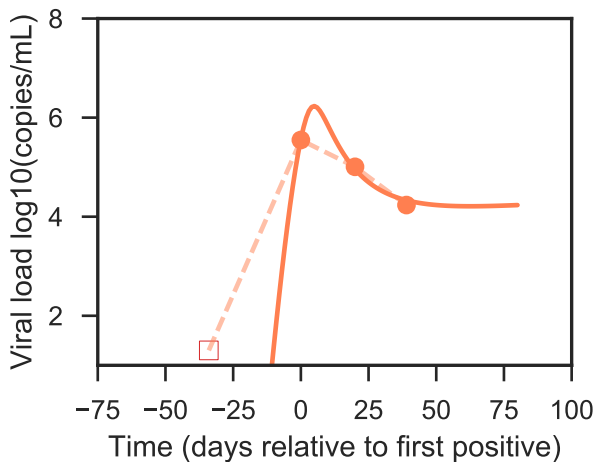



703-0597, IC80(Is)=3.84 $\mu$ g/mL

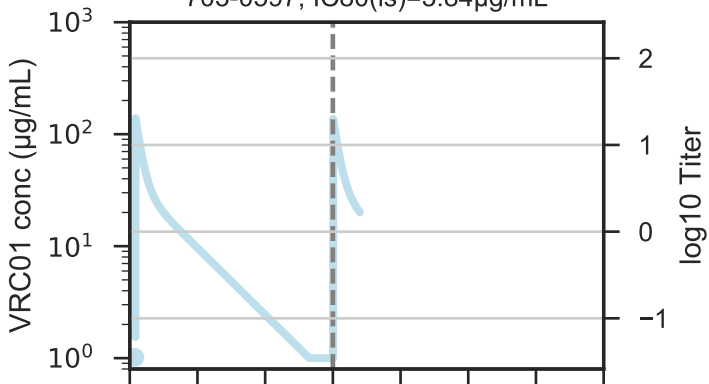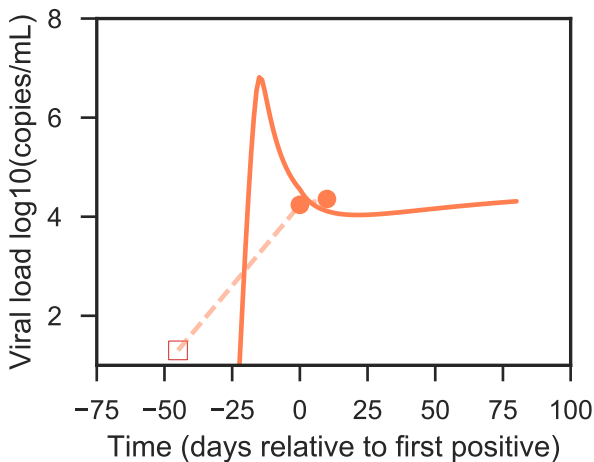

703-0636, IC80(Is)=1.63 $\mu$ g/mL

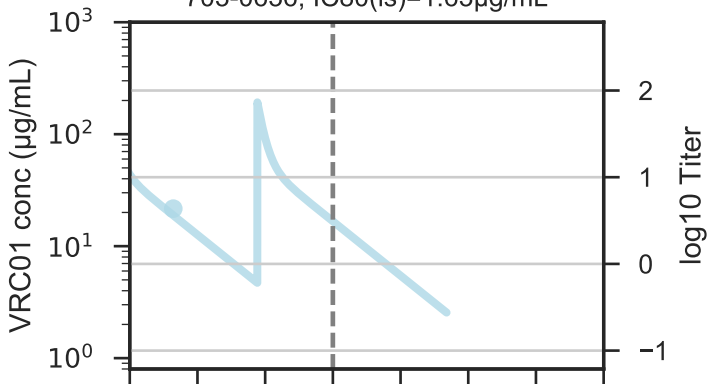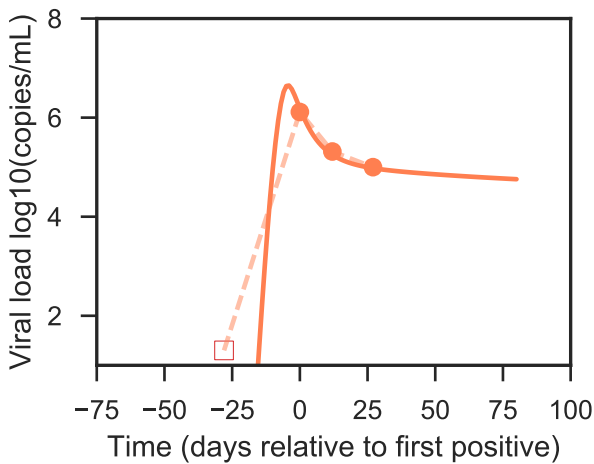

703-0790, IC80(Is)=100.0 $\mu$ g/mL

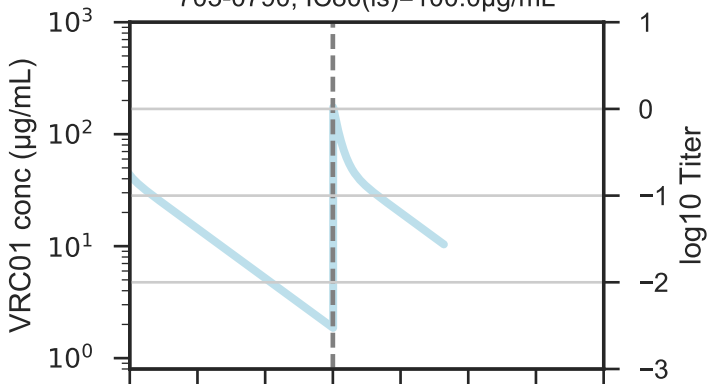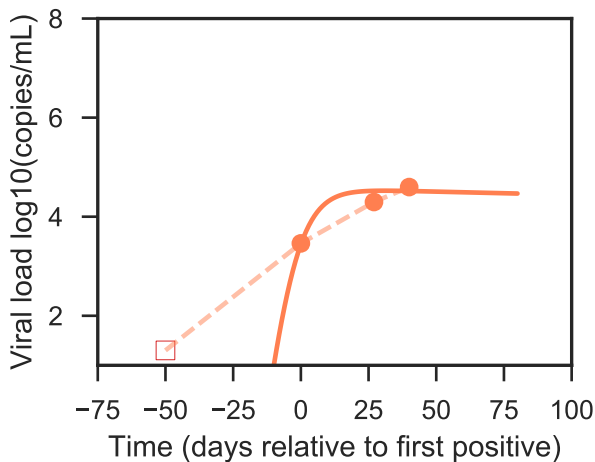

703-0795, IC80(Is)=4.77 $\mu$ g/mL

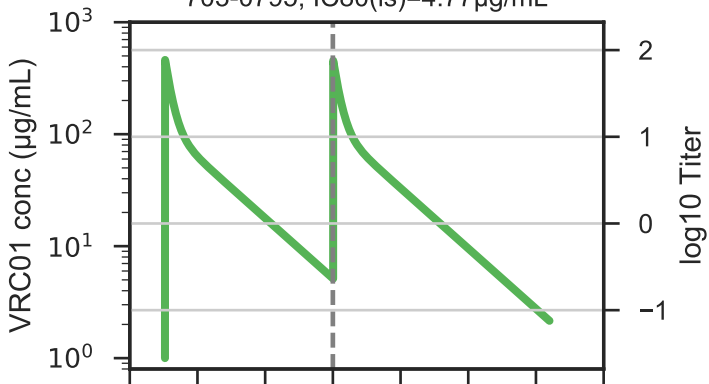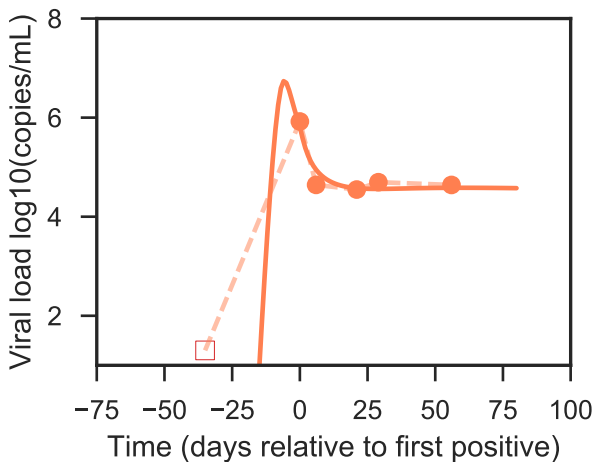

703-0860, IC80(Is)=2.63 $\mu$ g/mL

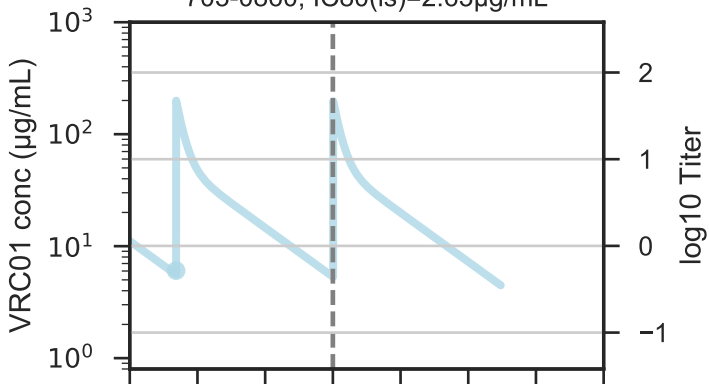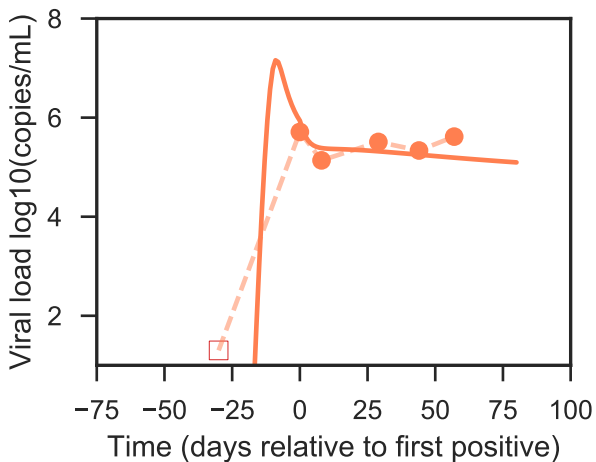

703-0902, IC80(Is)=100.0 $\mu$ g/mL

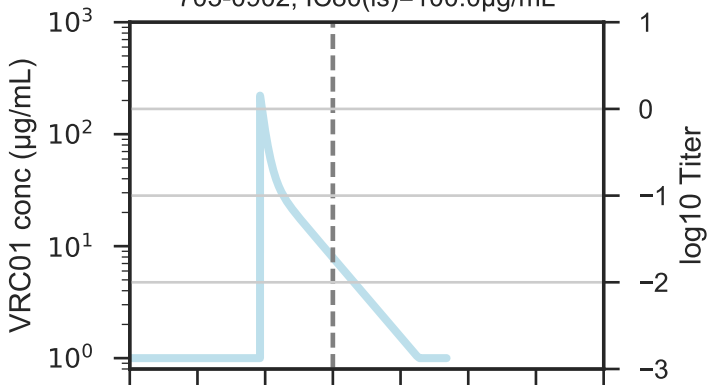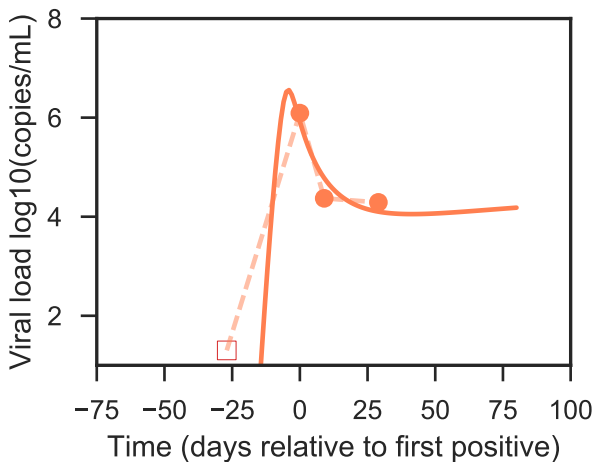

703-0944, IC80(Is)=29.83 $\mu$ g/mL

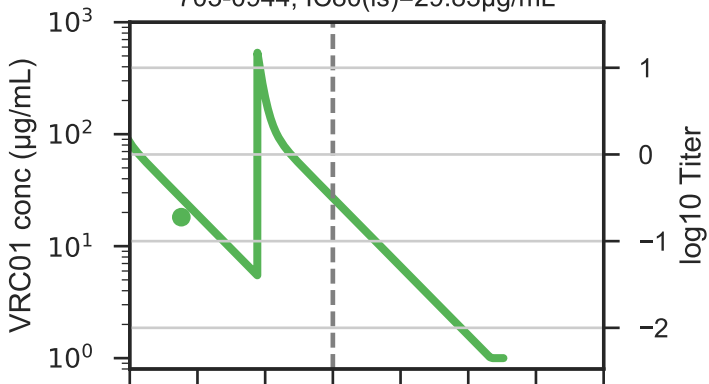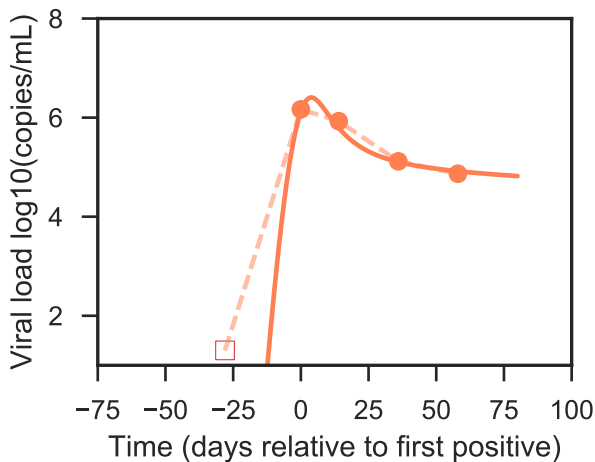

703-0948, IC80(Is)=5.32 $\mu$ g/mL

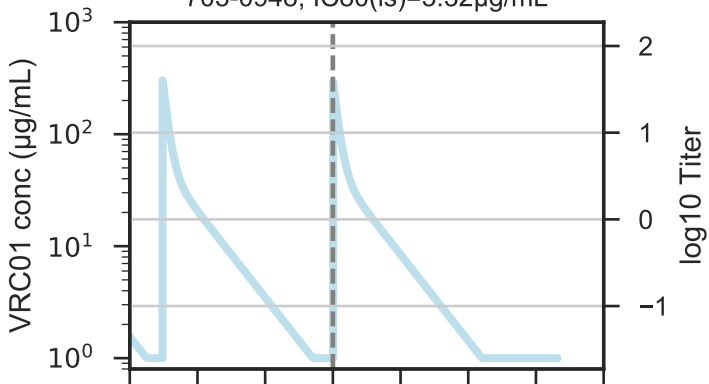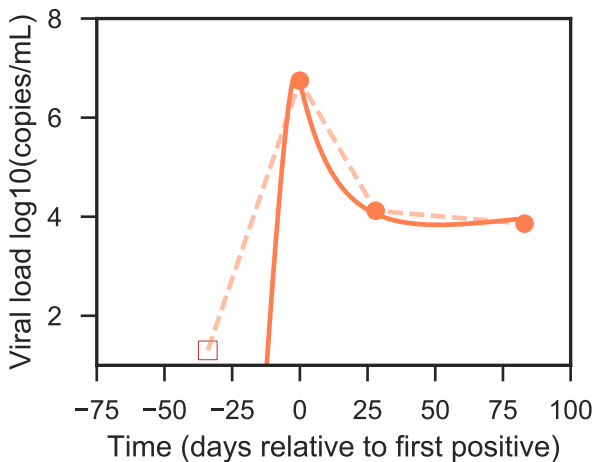



703-0967, IC80(Is)=1.11 $\mu$ g/mL

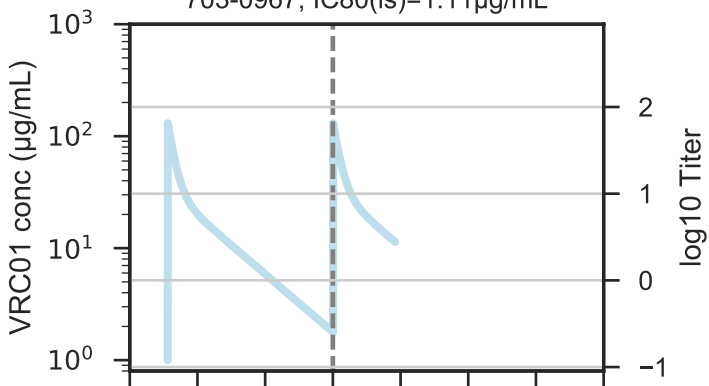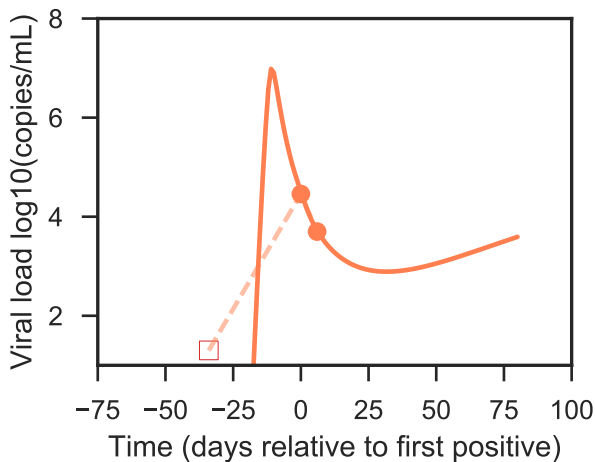

703-0993, IC80(Is)=2.21 $\mu$ g/mL

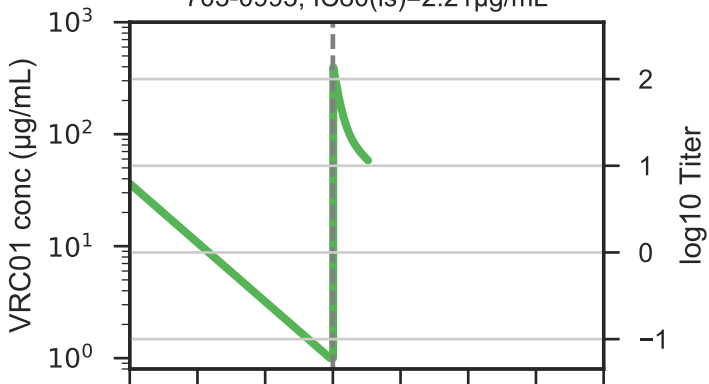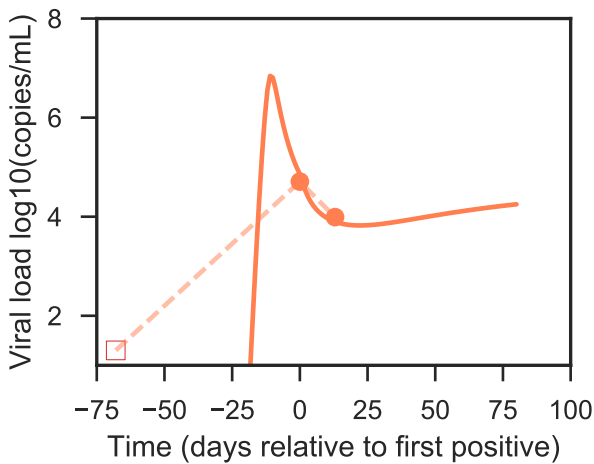

703-1026, IC80(Is)=3.75 $\mu$ g/mL

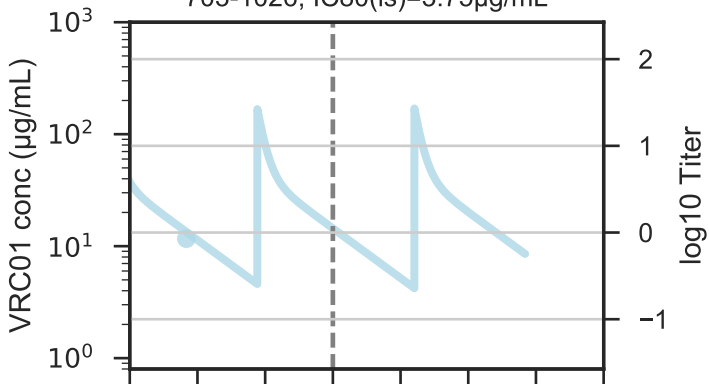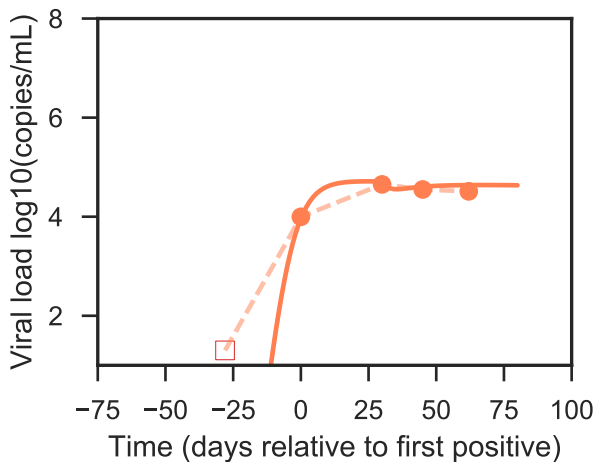

703-1034, IC80(Is)=22.8 $\mu$ g/mL

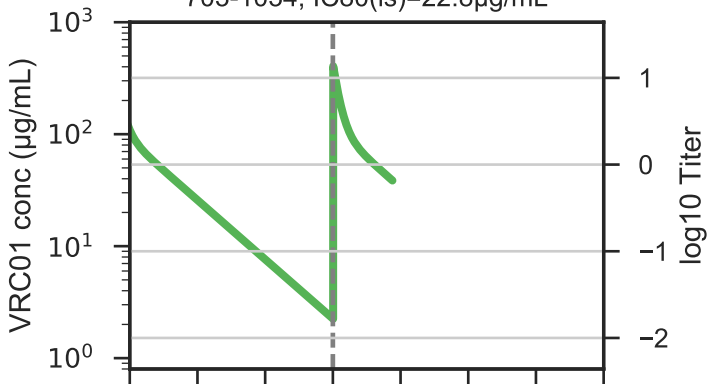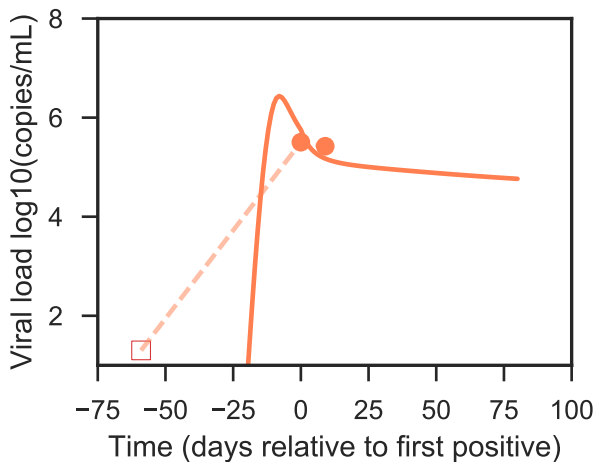

703-1194, IC80(Is)=6.93 $\mu$ g/mL

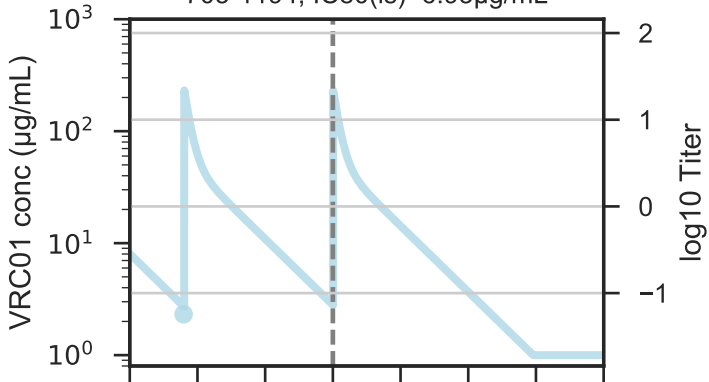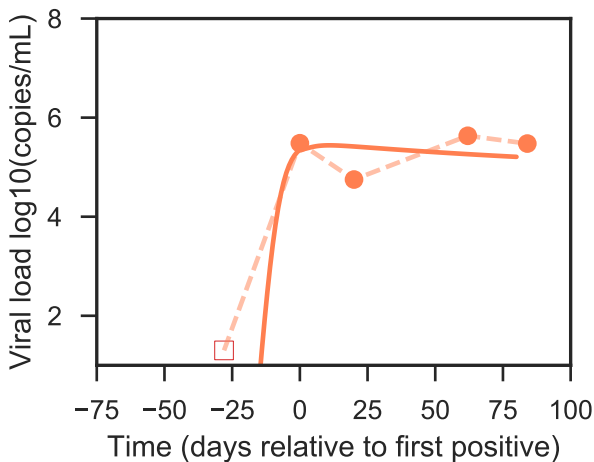

703-1407, IC80(Is)=3.99 $\mu$ g/mL

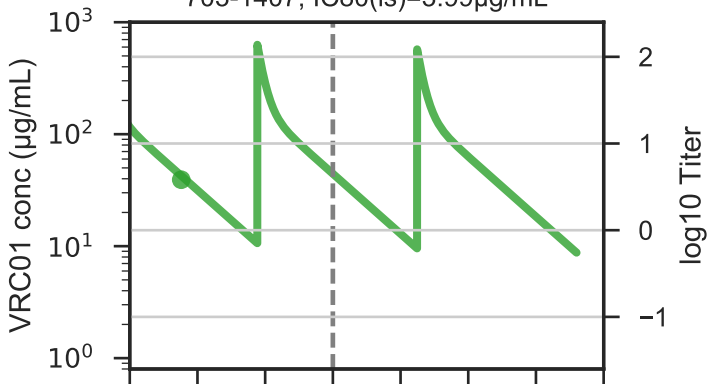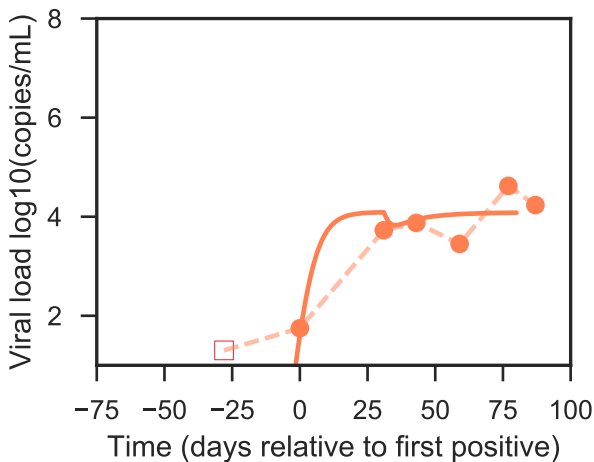

703-1446, IC80(Is)=100.0 $\mu$ g/mL

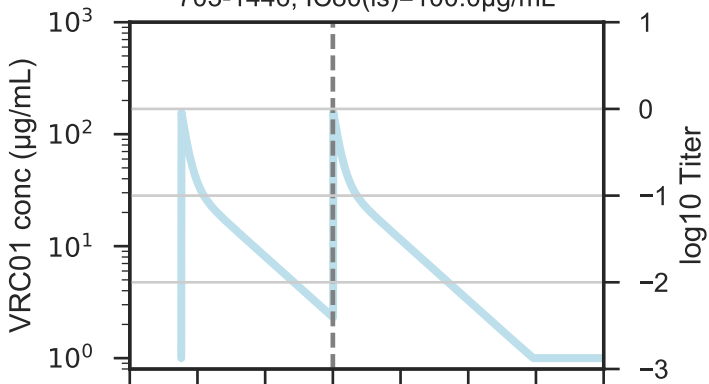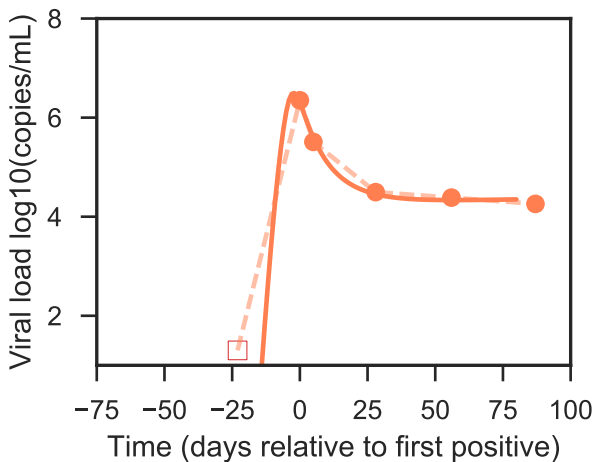

703-1515, IC80(Is)=100.0 $\mu$ g/mL

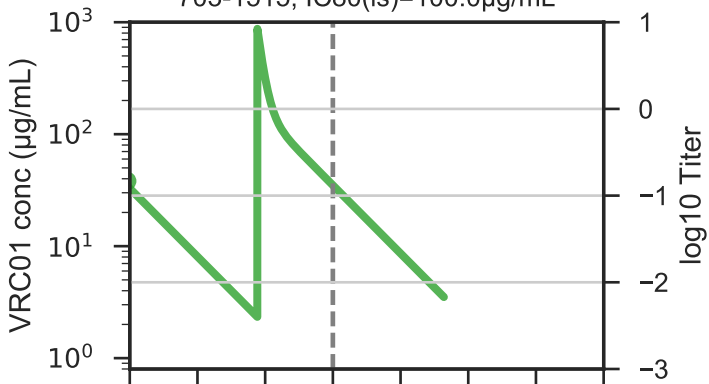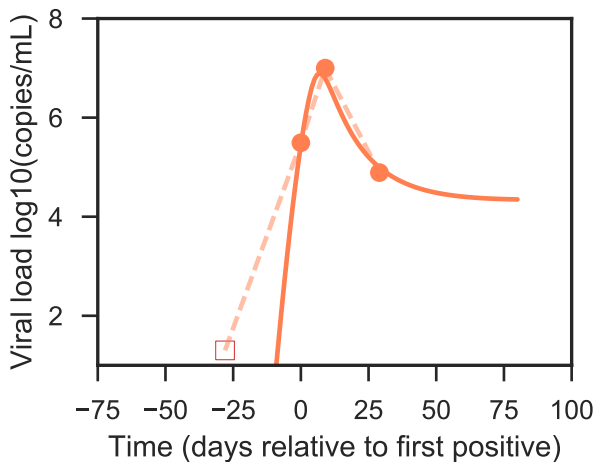



703-1586, IC80(Is)=100.0 $\mu$ g/mL

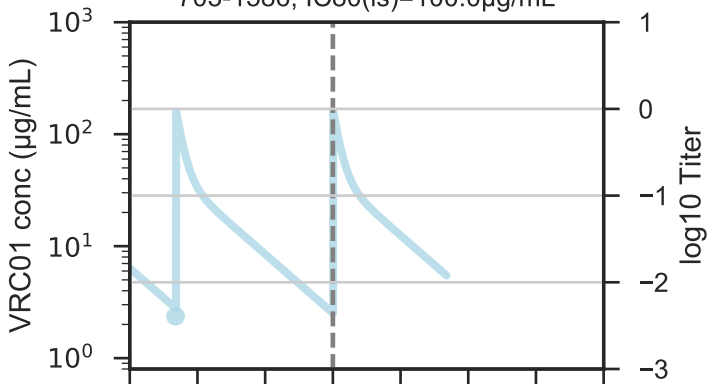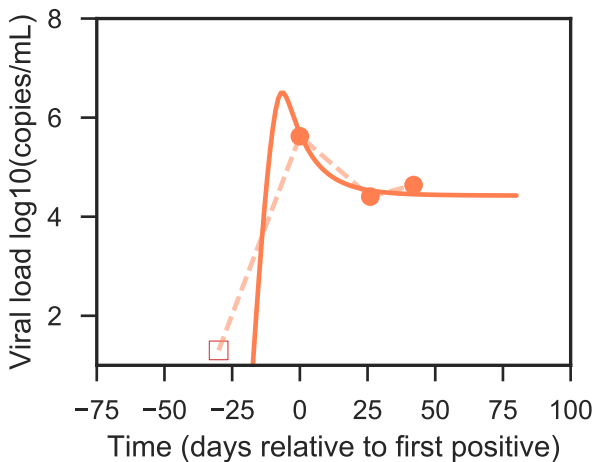

703-1670, IC80(Is)=100.0 $\mu$ g/mL

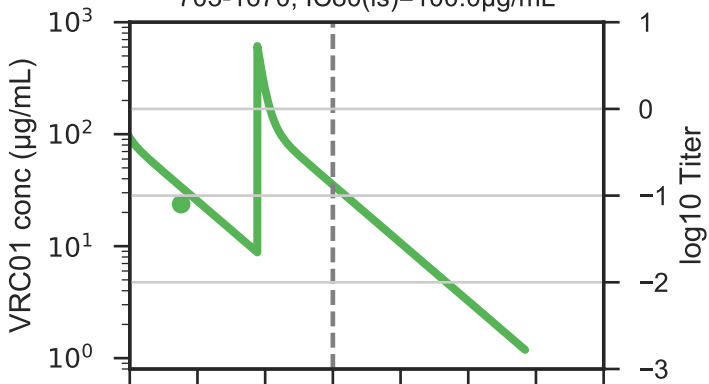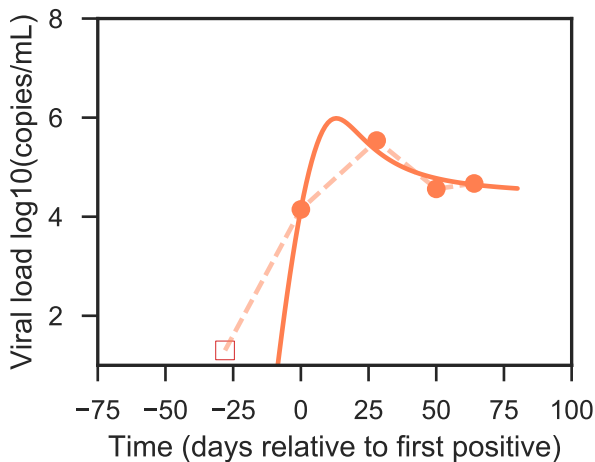

703-1687, IC80(Is)=3.18 $\mu$ mL

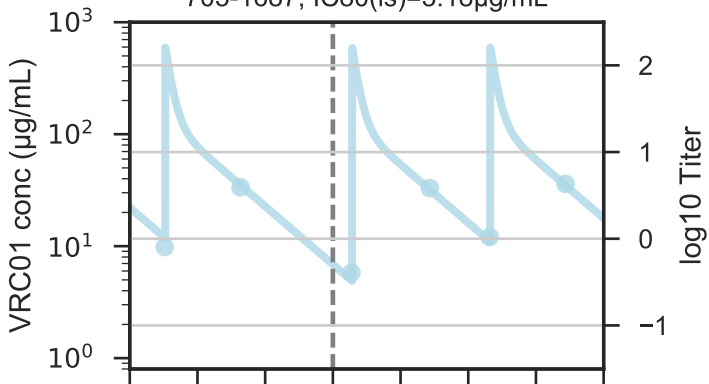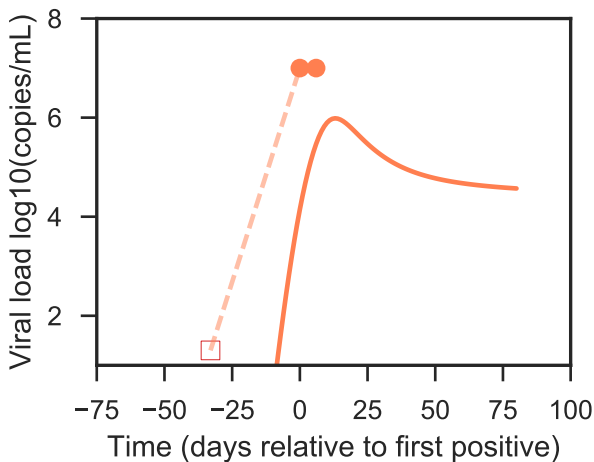

703-1689, IC80(Is)=31.36 $\mu$ g/mL

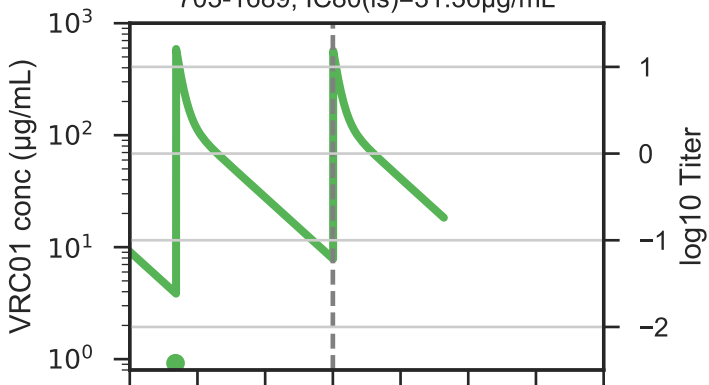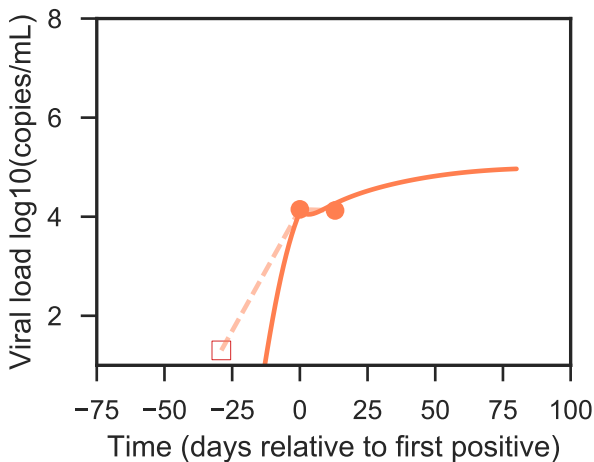

703-1714, IC80(Is)=100.0 $\mu$ g/mL

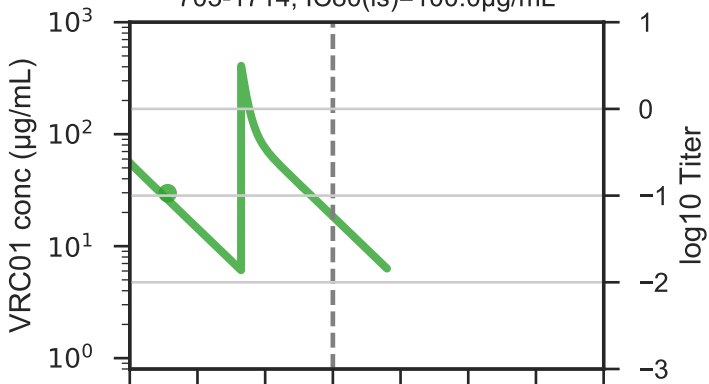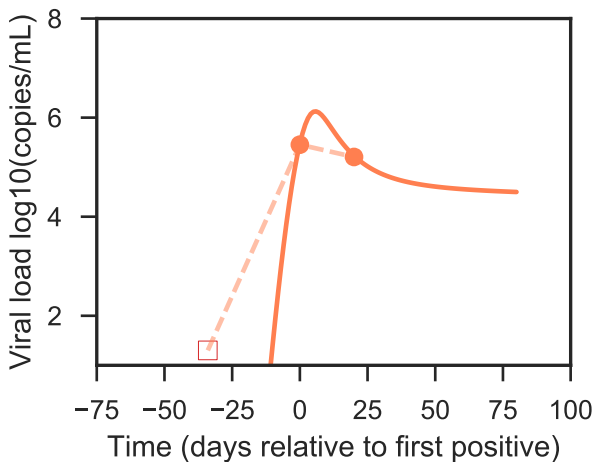

703-1783, IC80(Is)=2.06 $\mu$ g/mL

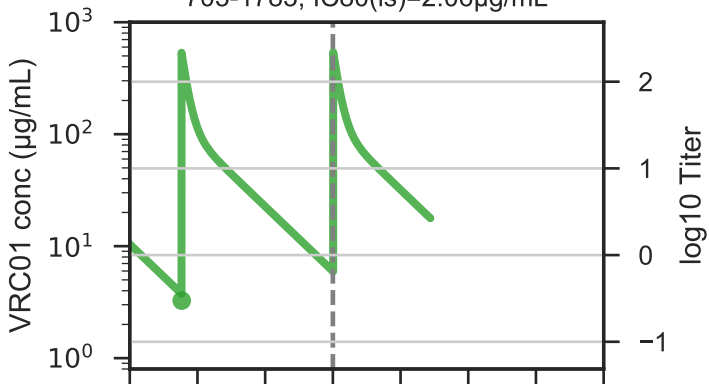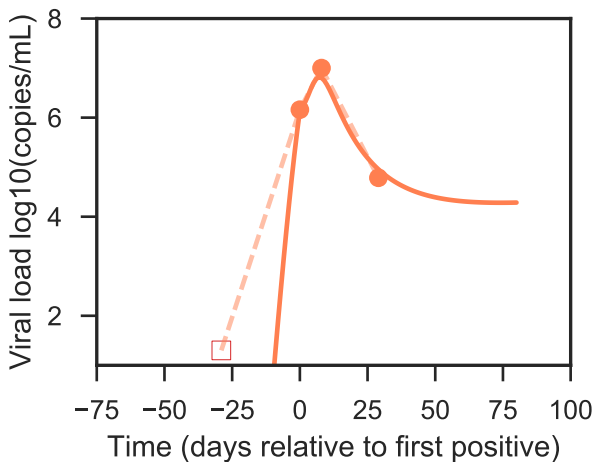

703-1798, IC80(Is)=100.0 $\mu$ g/mL

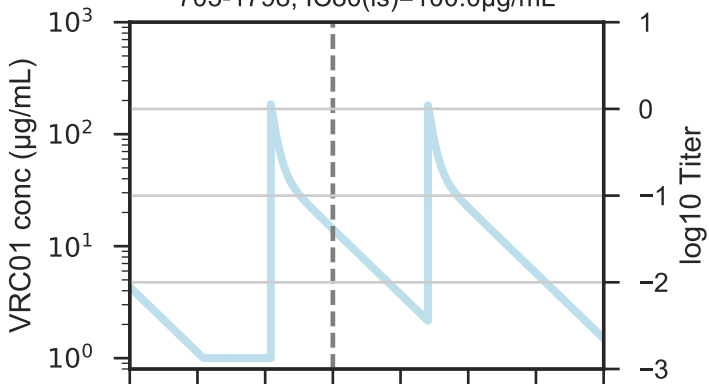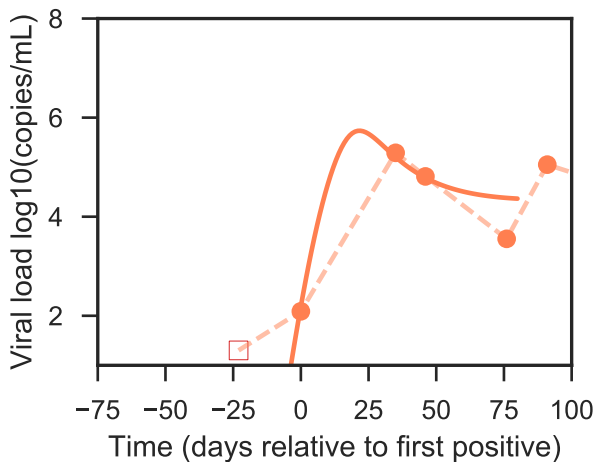

703-1828, IC80(Is)=1.08 $\mu$ g/mL

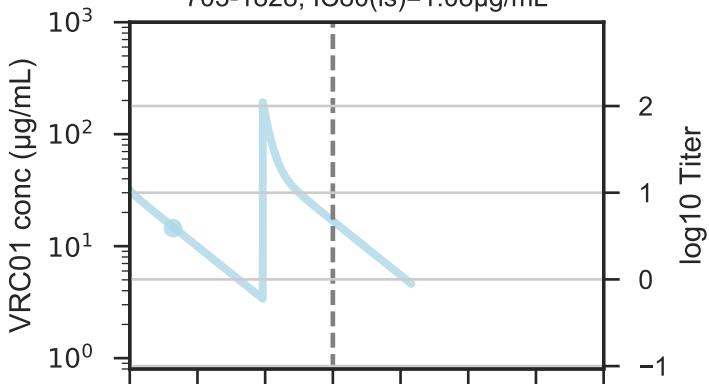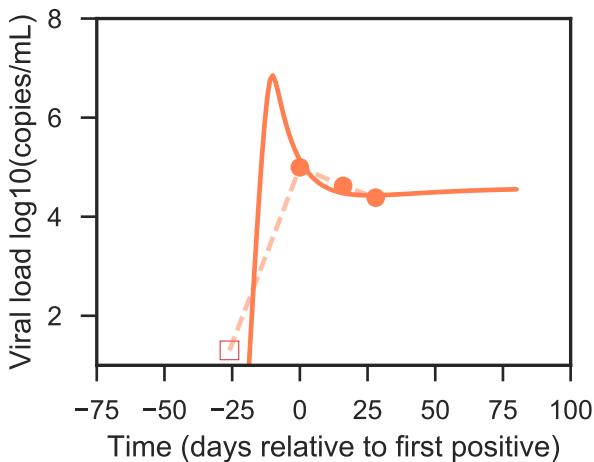



703-1855, IC80(Is)=6.83 $\mu$ g/mL

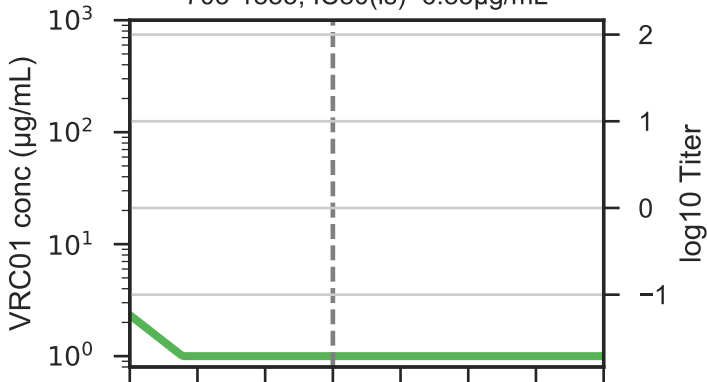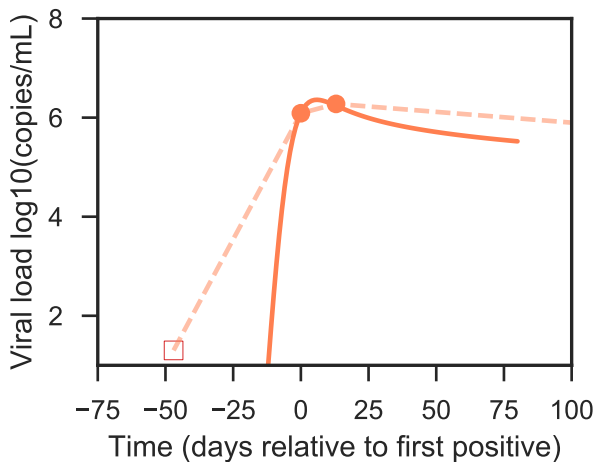

703-1945, IC80(Is)=3.64 $\mu$ g/mL

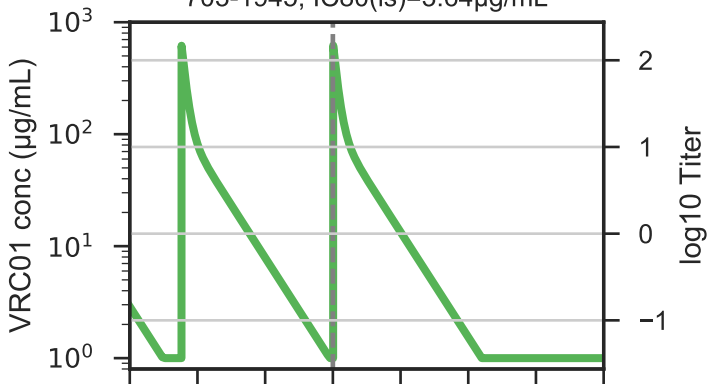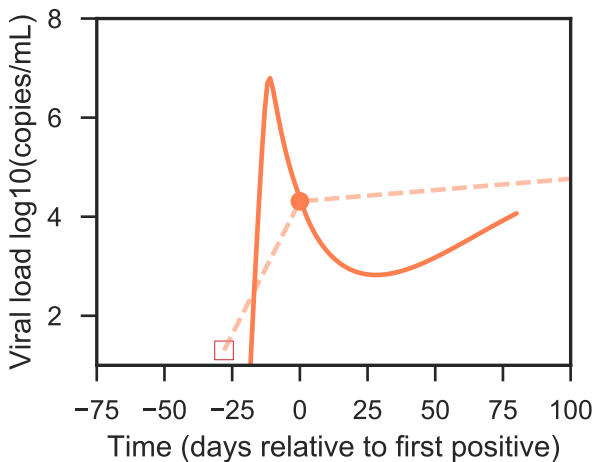

703-2141, IC80(Is)=2.89 $\mu$ g/mL

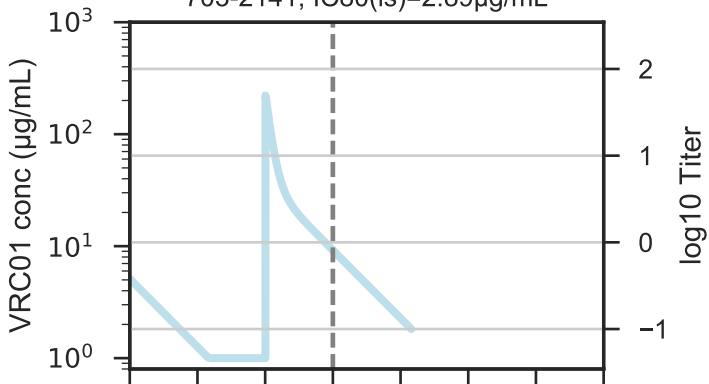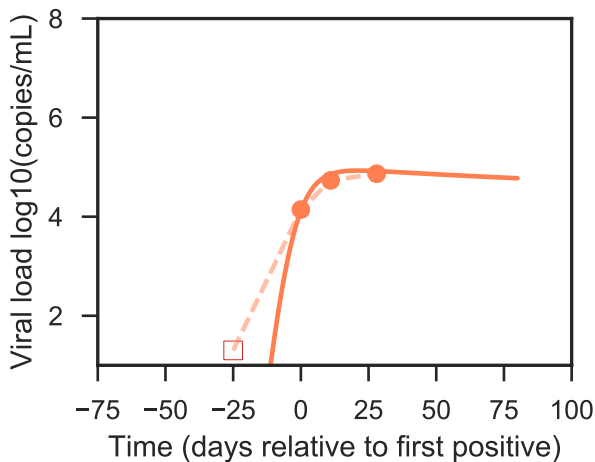

703-2372, IC80(Is)=3.28 $\mu$ g/mL

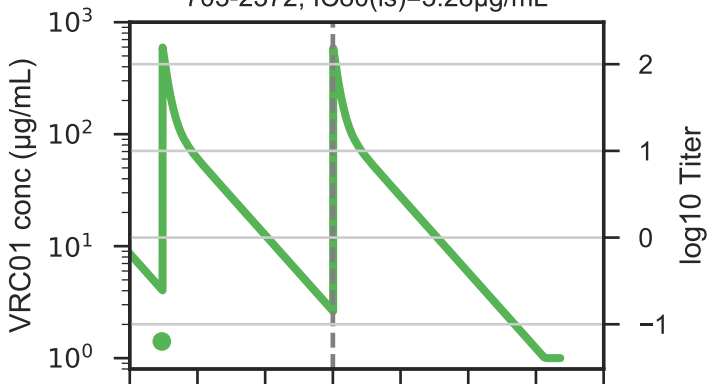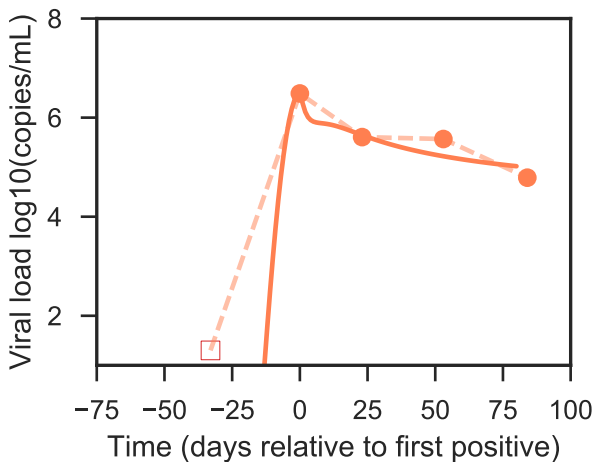

703-2769, IC80(Is)=77.56 $\mu$ g/mL

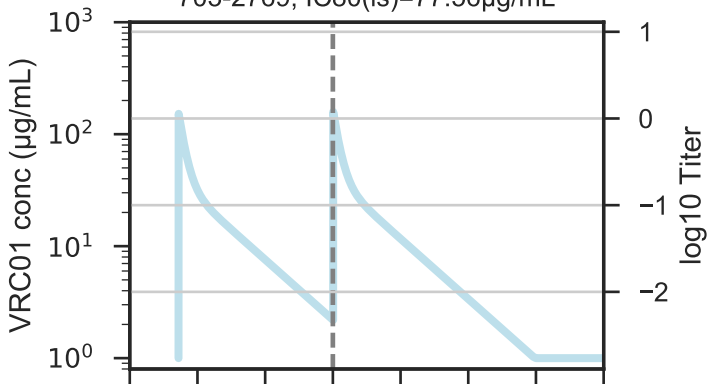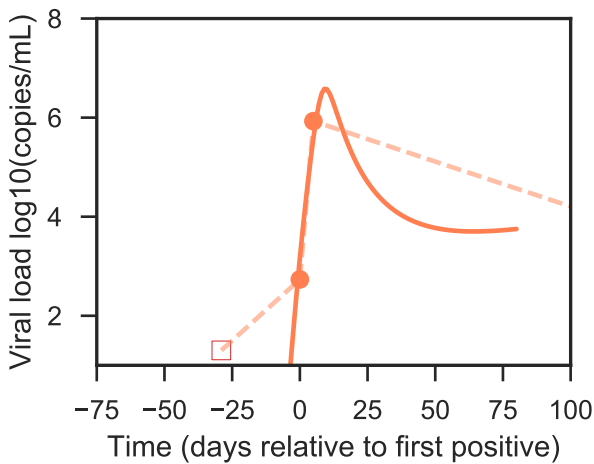

703-2934, IC80(Is)=23.96 $\mu$ g/mL

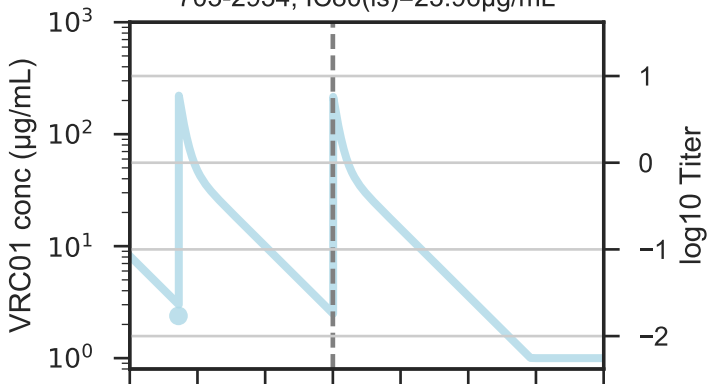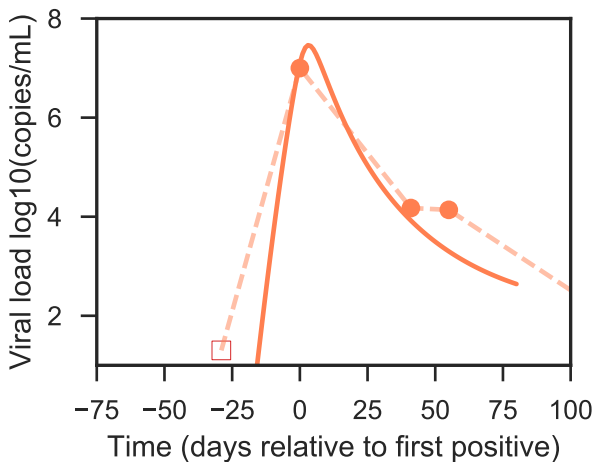

703-3000, IC80(Is)=3.04 $\mu$ g/mL

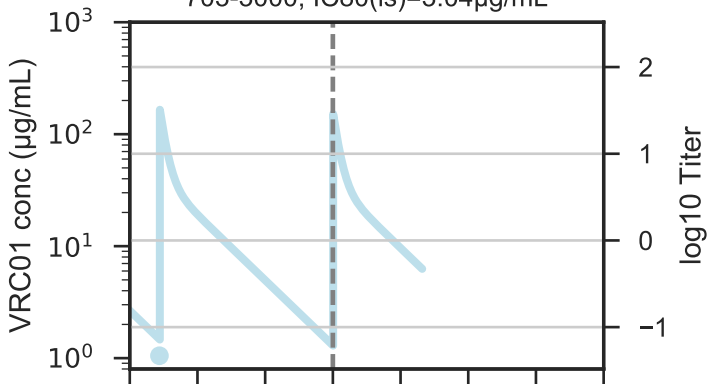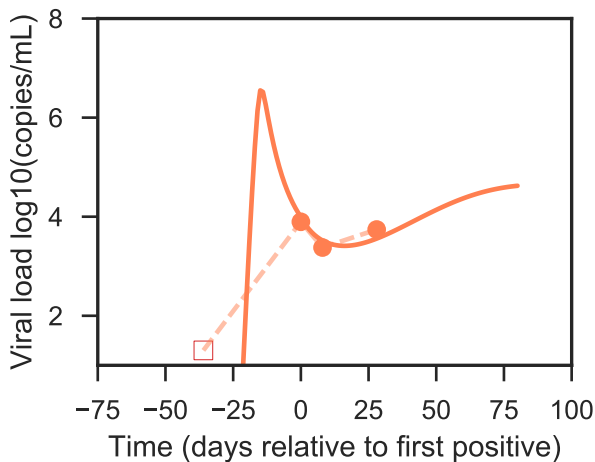

704-0029, IC80(Is)=3.72 $\mu$ g/mL

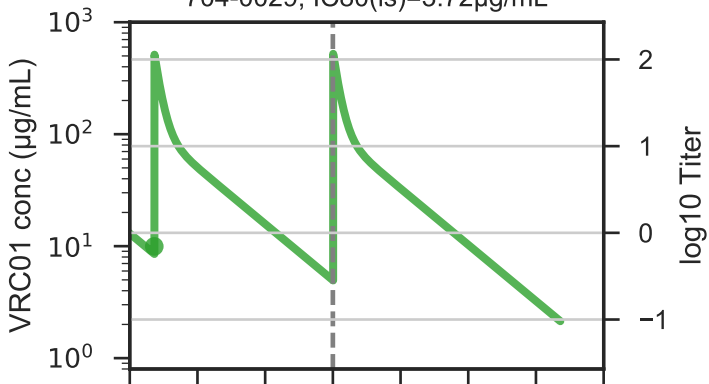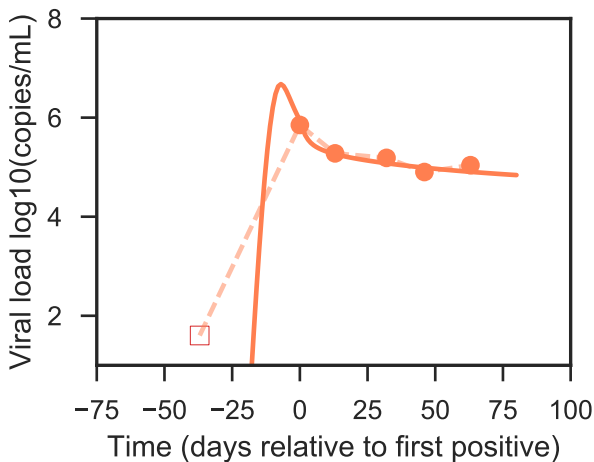



704-0175, IC80(Is)=3.03 $\mu$ g/mL

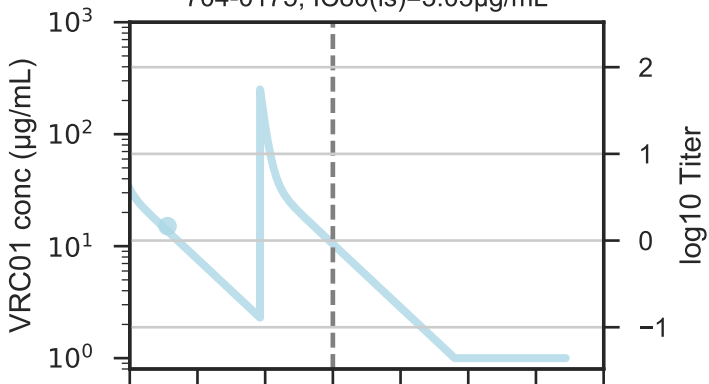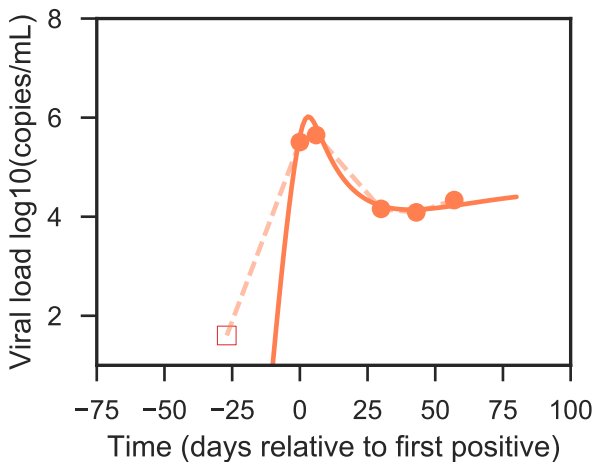

704-0218, IC80(Is)=5.78 $\mu$ g/mL

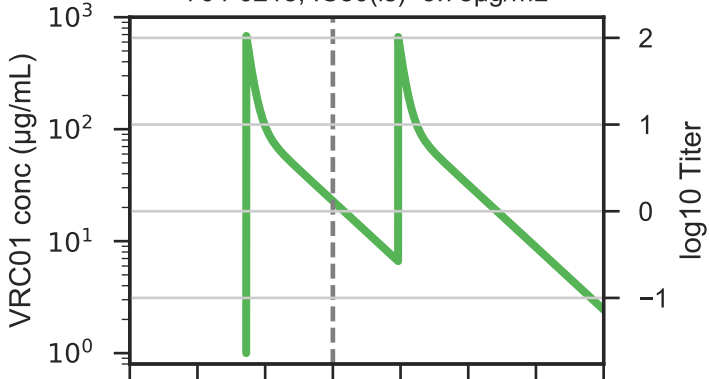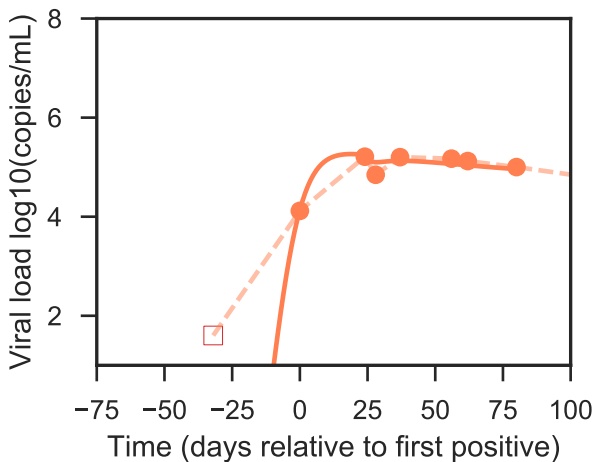

704-0298, IC80(Is)=4.97 $\mu$ g/mL

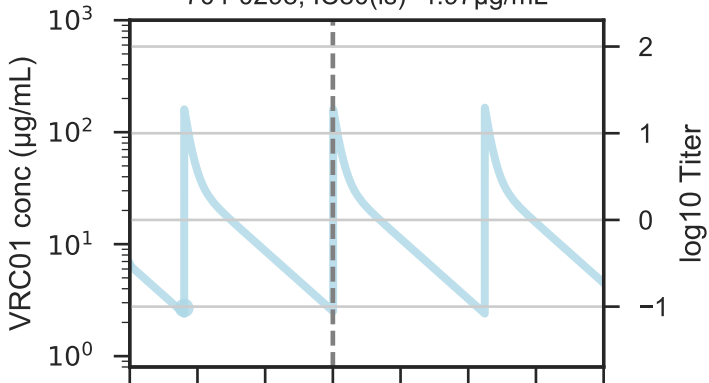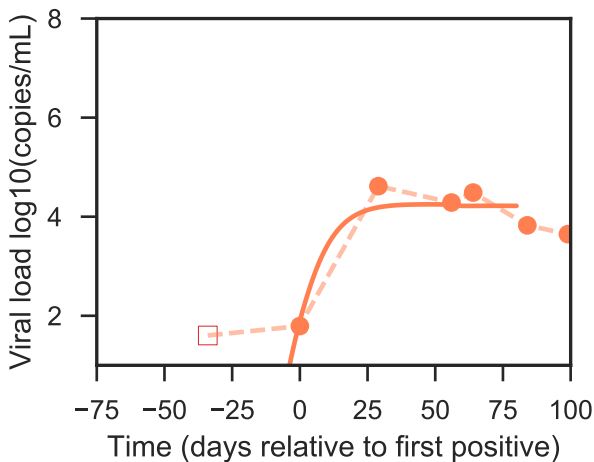

704-0340, IC80(Is)=11.32 $\mu$ g/mL

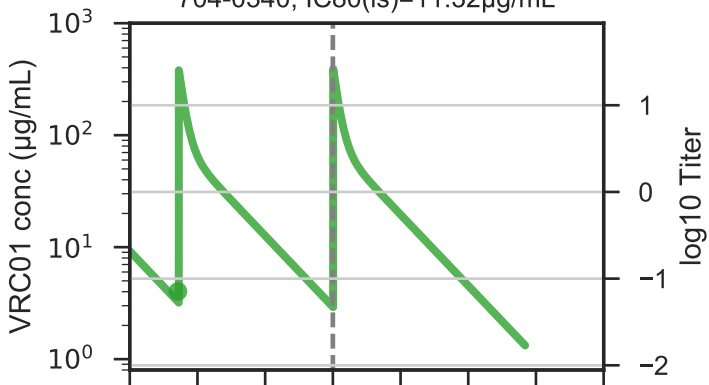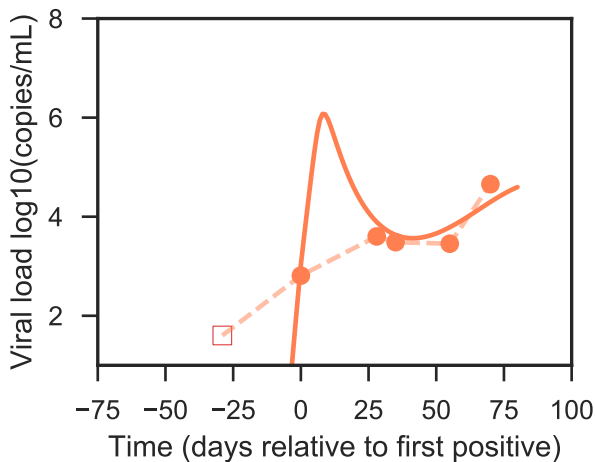

704-0478, IC80(Is)=37.85 $\mu$ g/mL

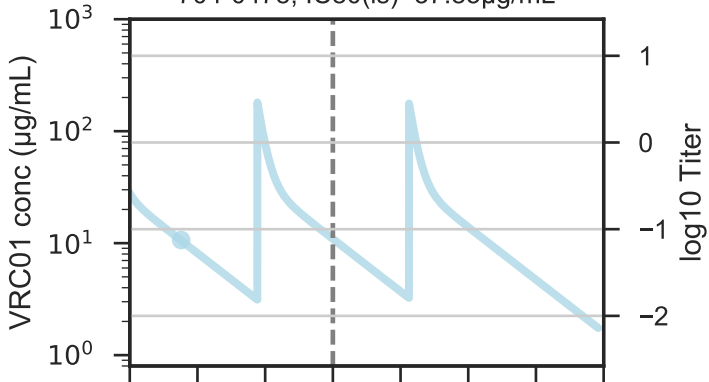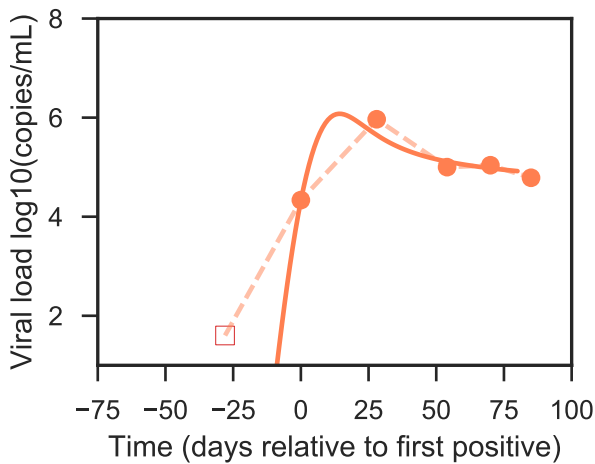

704-0562, IC80(Is)=23.01 $\mu$ g/mL

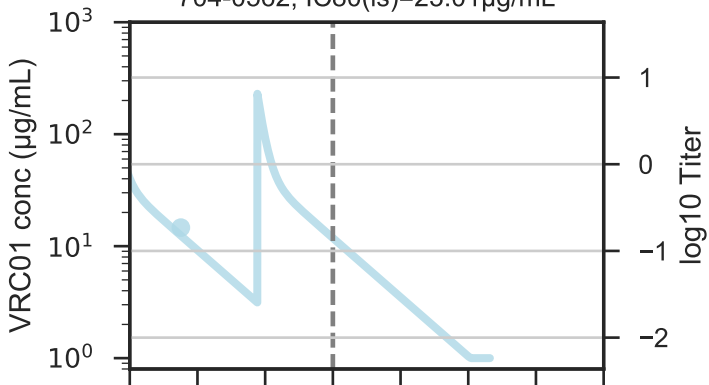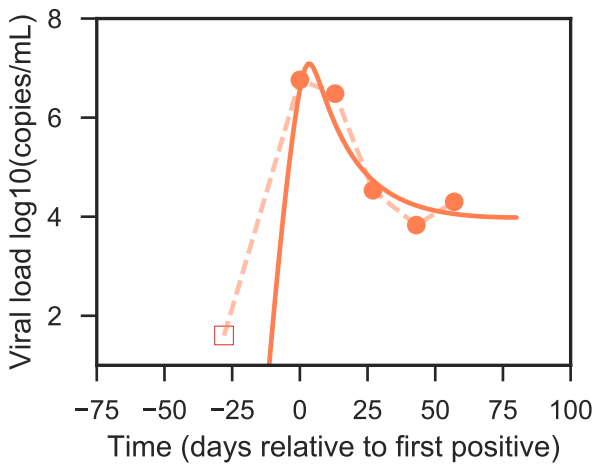

704-0601, IC80(Is)=1.26 $\mu$ g/mL

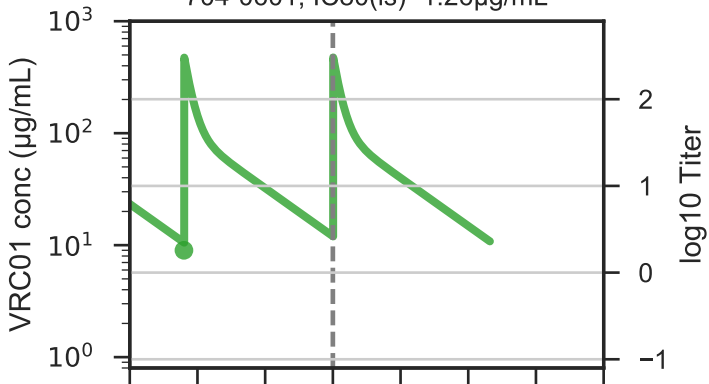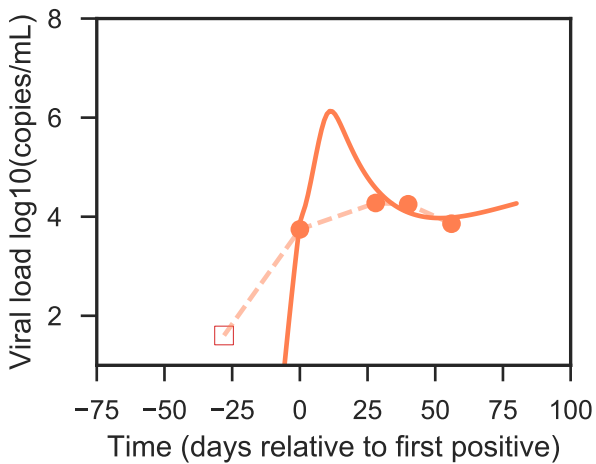

704-0652, IC80(Is)=3.49 $\mu$ g/mL

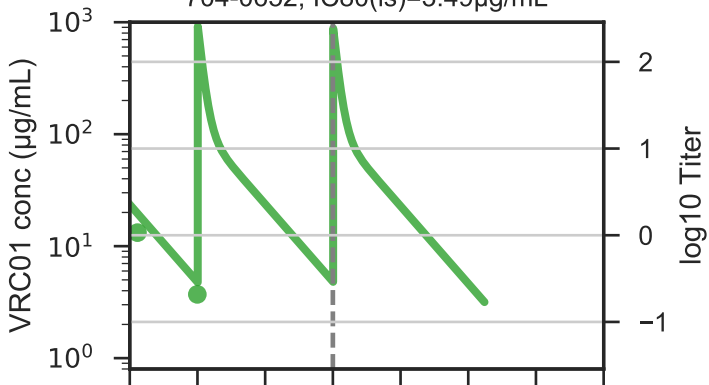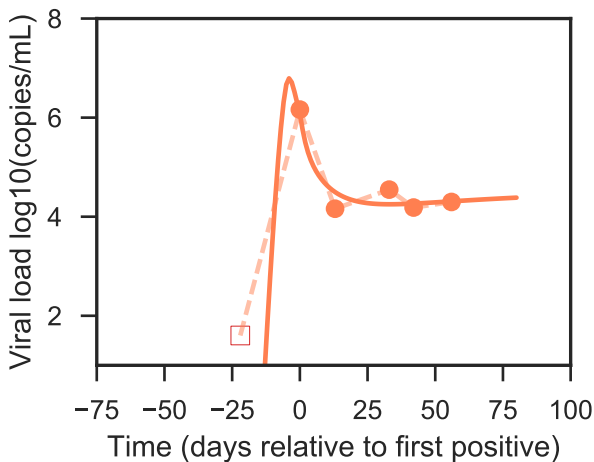



704-0662, IC80(Is)=12.37 $\mu$ g/mL

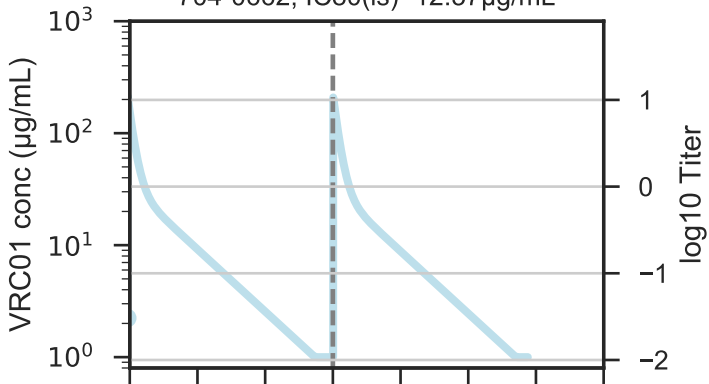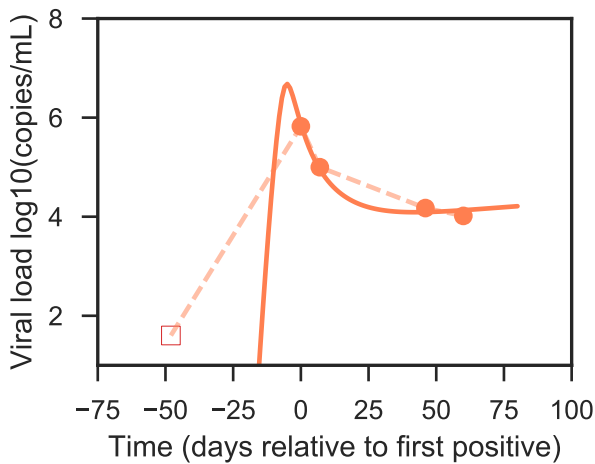

704-0714, IC80(Is)=2.2 $\mu$ g/mL

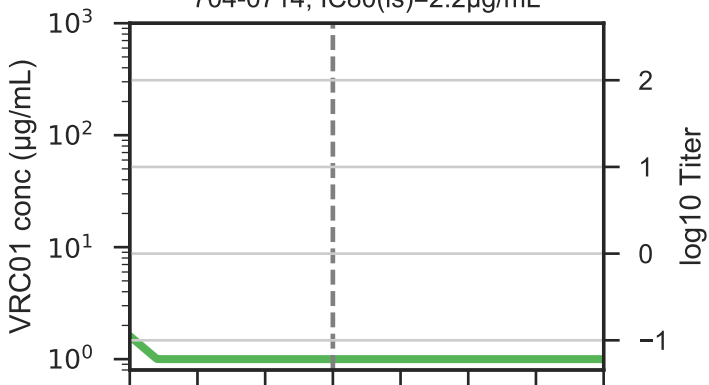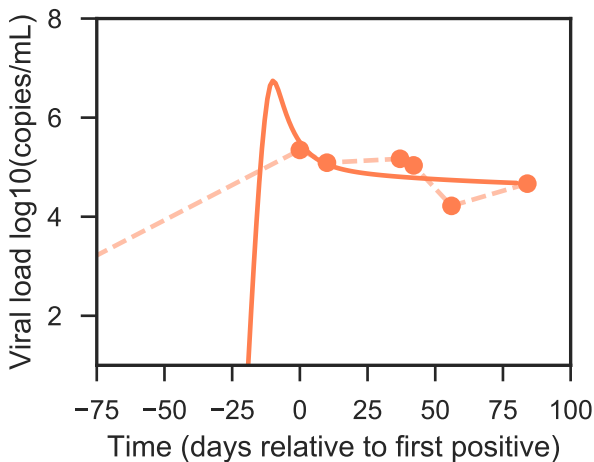

704-0751, IC80(Is)=2.21 $\mu$ g/mL

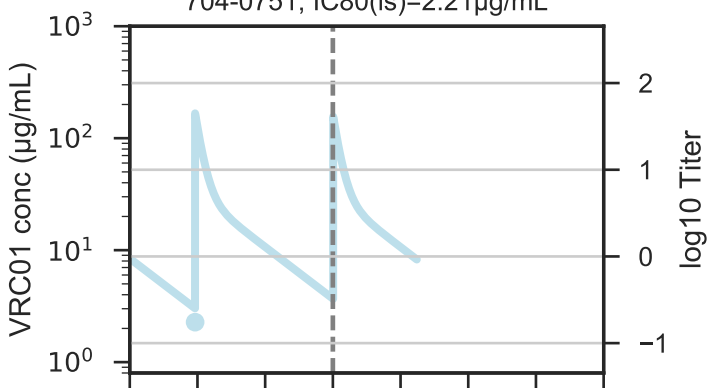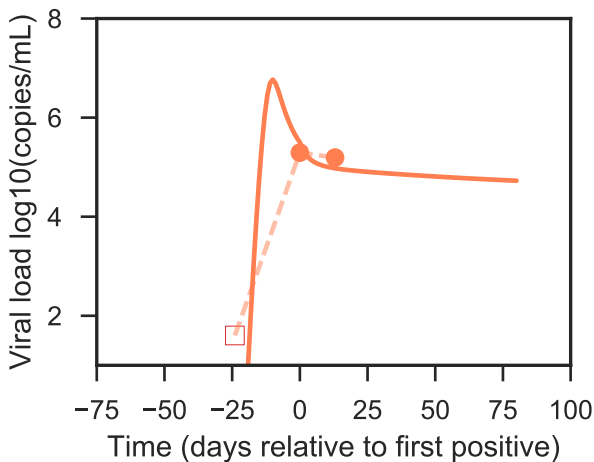

704-0826, IC80(Is)=4.65 $\mu$ g/mL

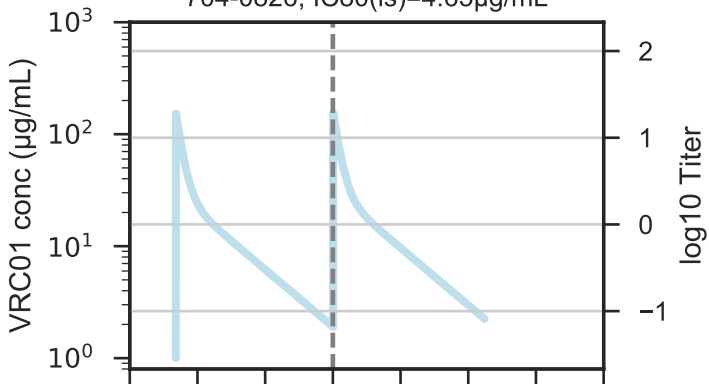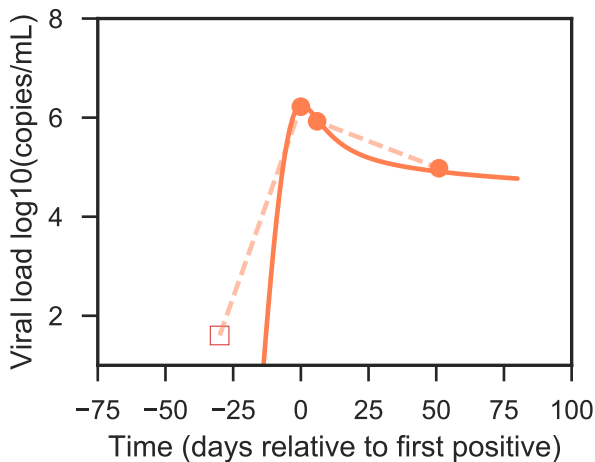

704-0892, IC80(Is)=5.4 $\mu$ g/mL

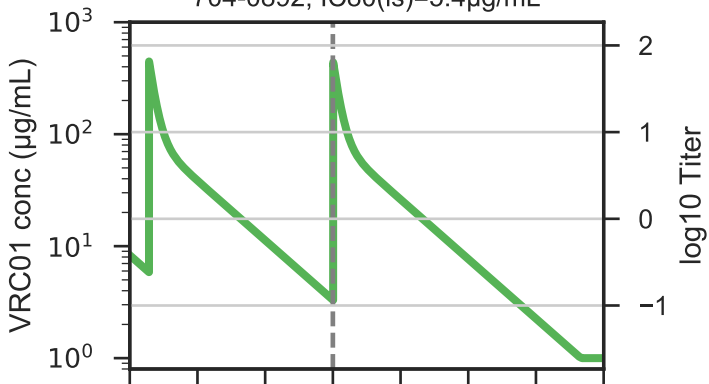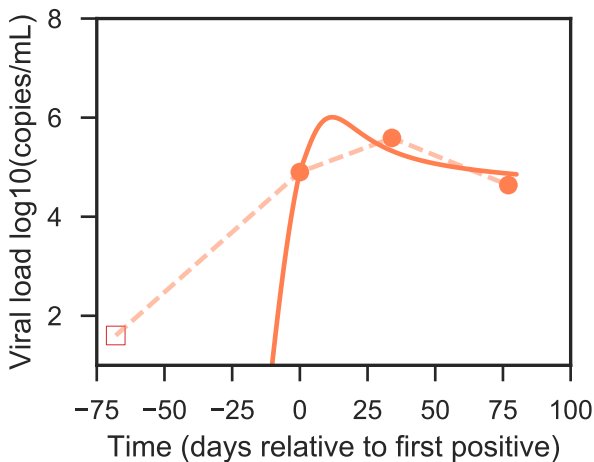

704-0893, IC80(Is)=3.58 $\mu$ g/mL

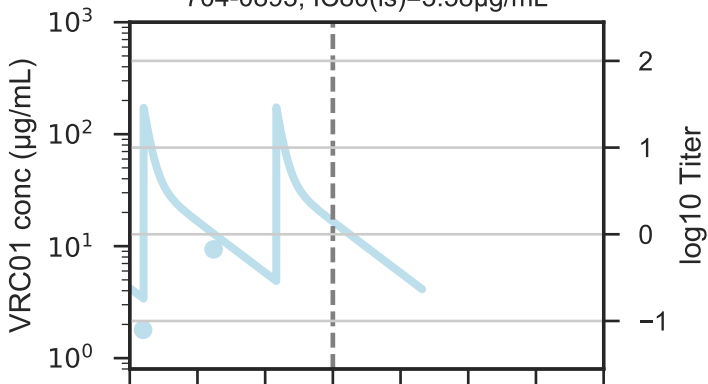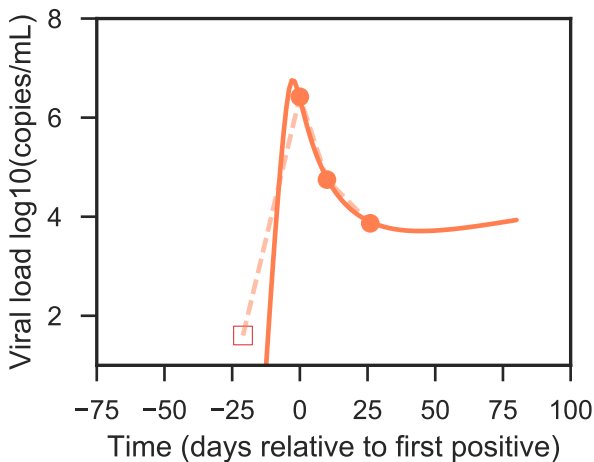

704-0925, IC80(Is)=2.97 $\mu$ g/mL

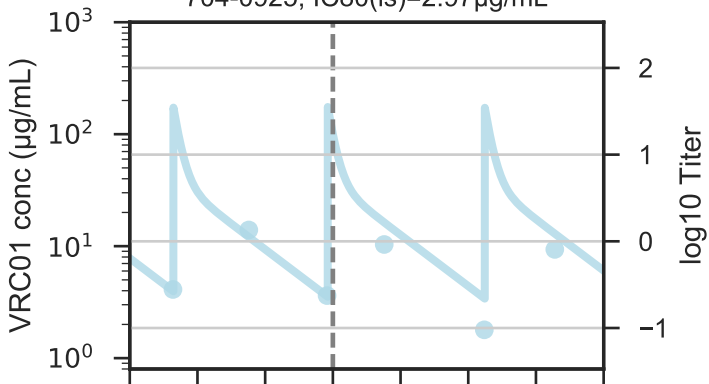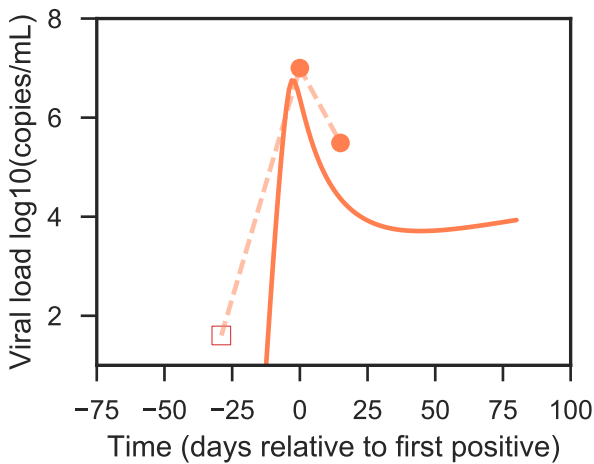

704-0941, IC80(Is)=4.53 $\mu$ g/mL

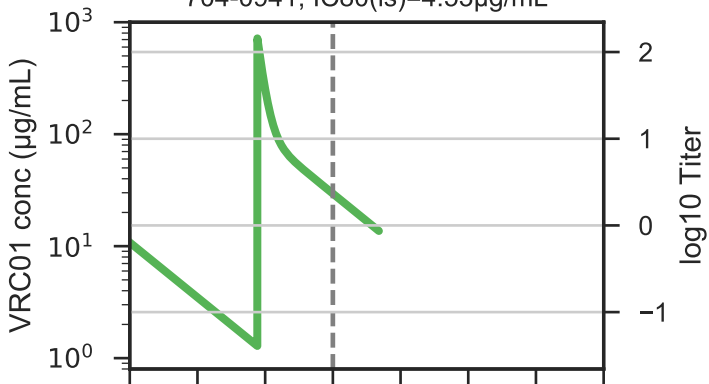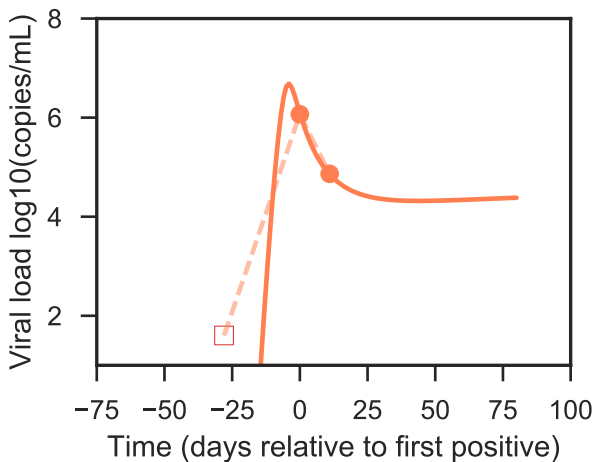



704-0985, IC80(Is)=100.0 $\mu$ g/mL

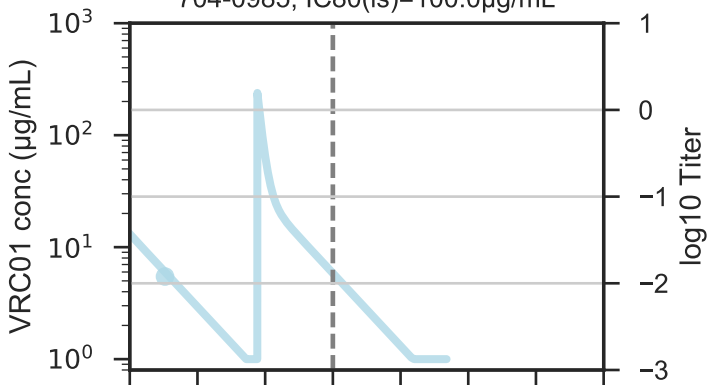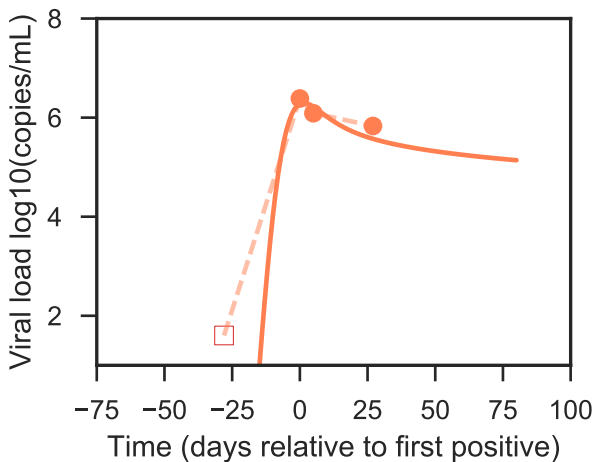

704-1168, IC80(Is)=100.0 $\mu$ g/mL

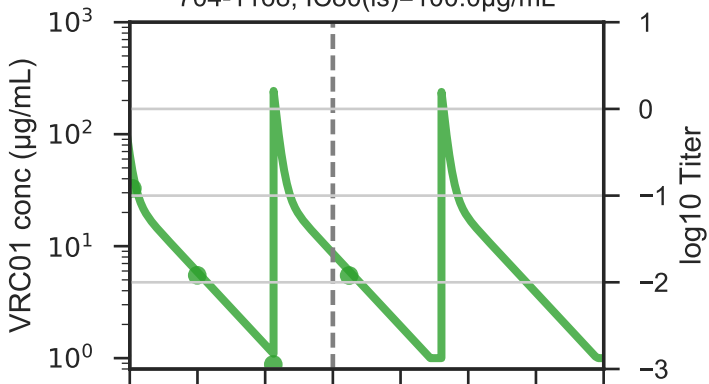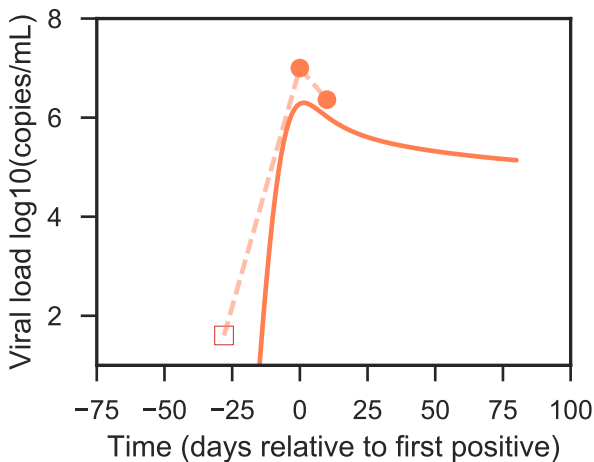

704-1225, IC80(Is)=9.59 $\mu$ g/mL

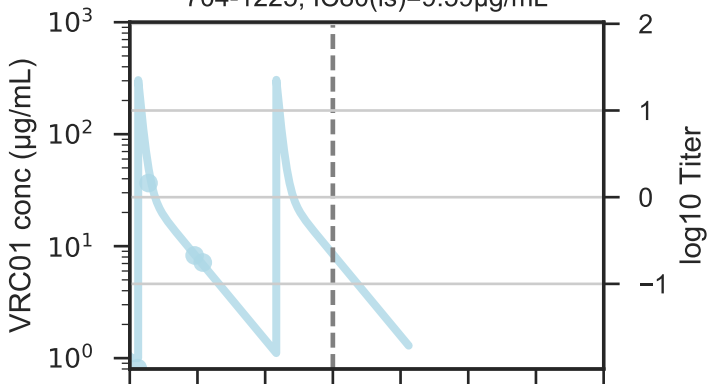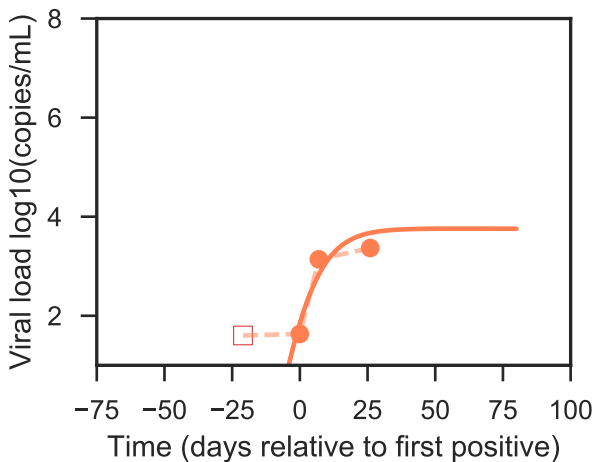

704-1236, IC80(Is)=6.38 $\mu$ g/mL

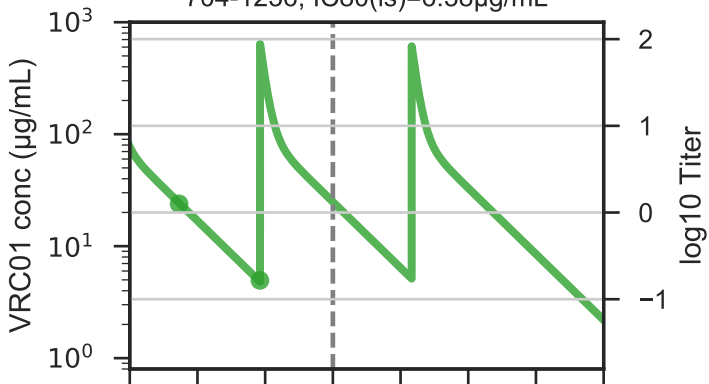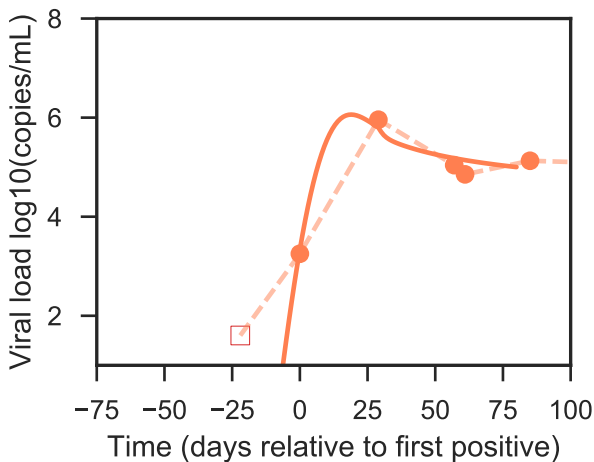

704-1328, IC80(Is)=9.73 $\mu$ g/mL

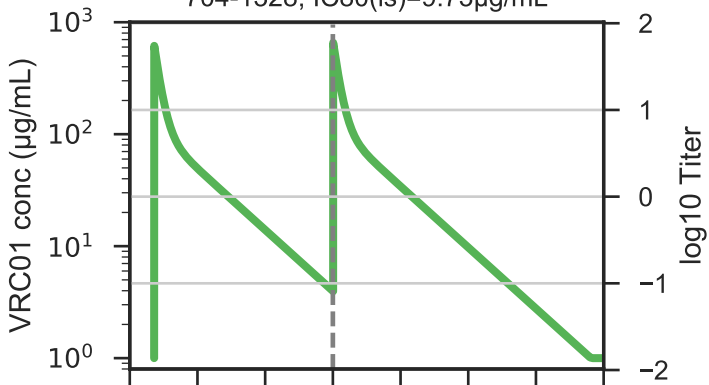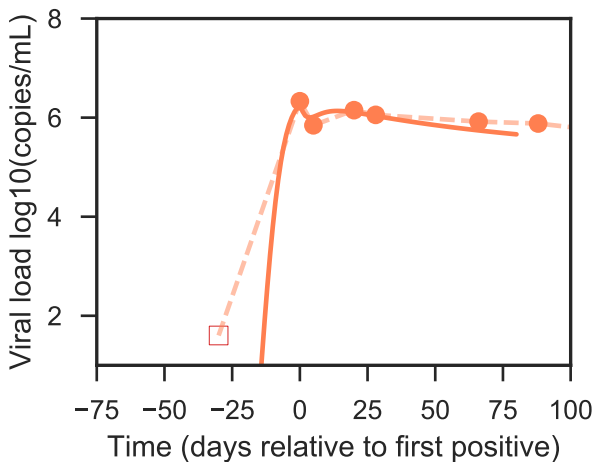

704-1332, IC80(Is)=2.42 $\mu$ g/mL

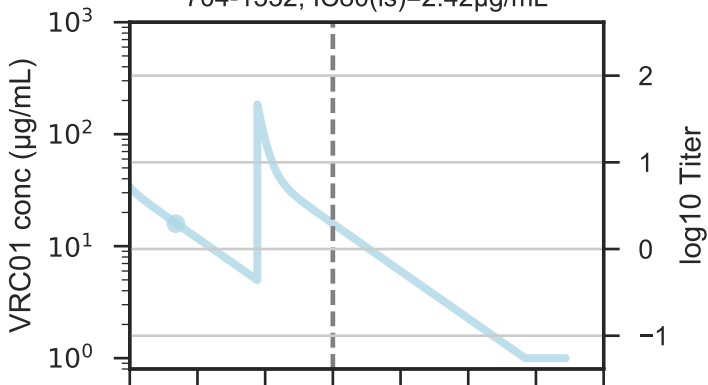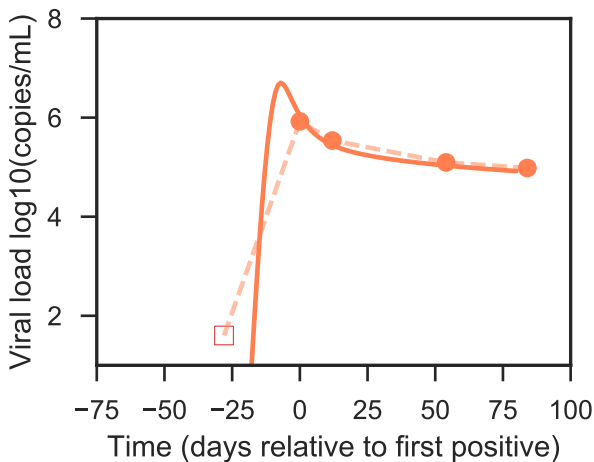

704-1481, IC80(Is)=100.0 $\mu$ g/mL

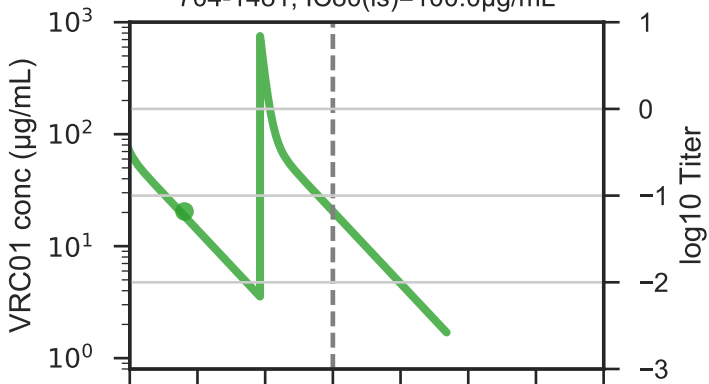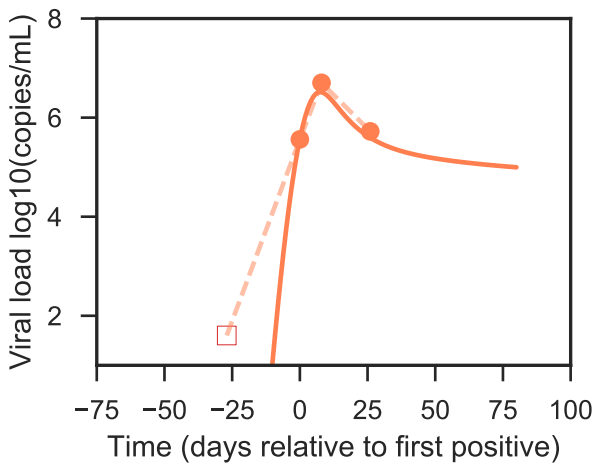

704-1551, IC80(Is)=2.28 $\mu$ g/mL

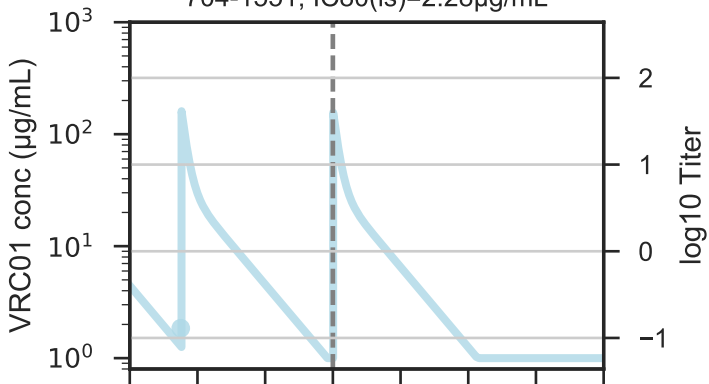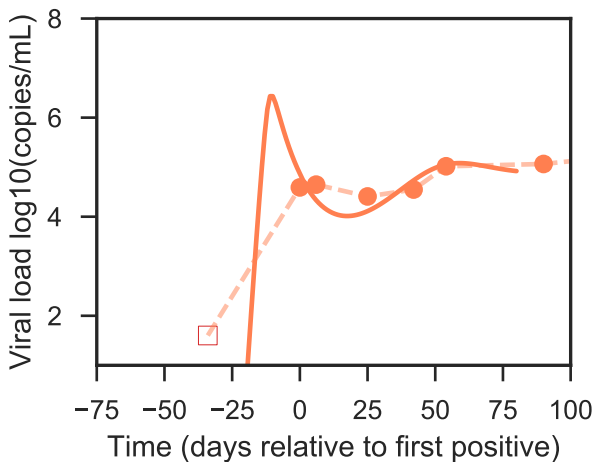



704-1651, IC80(Is)=4.58 $\mu$ g/mL

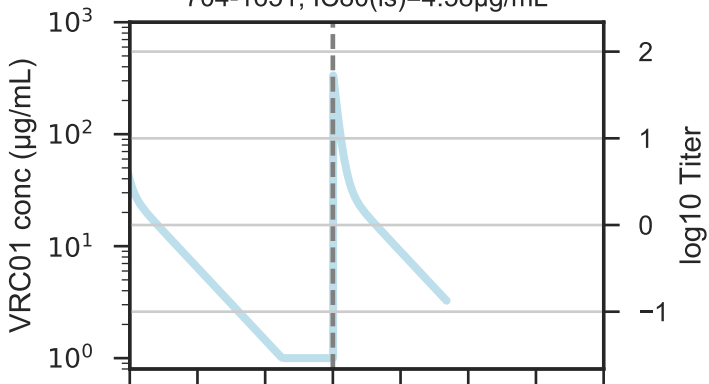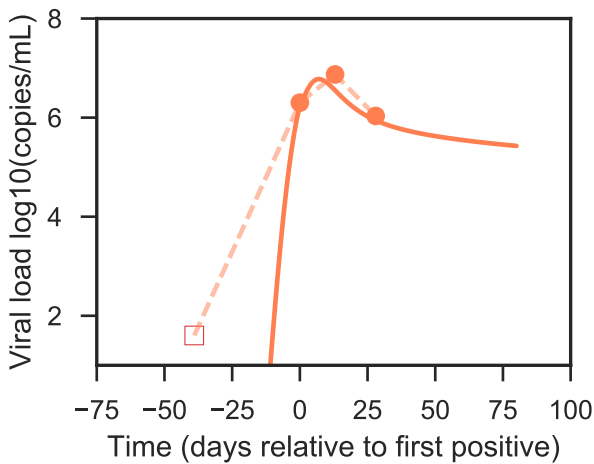

704-1654, IC80(Is)=100.0 $\mu$ g/mL

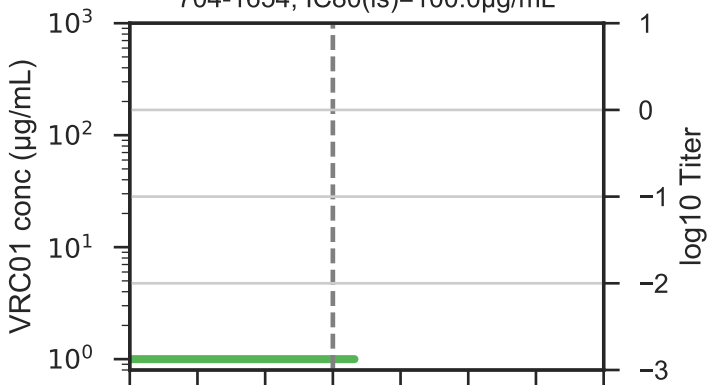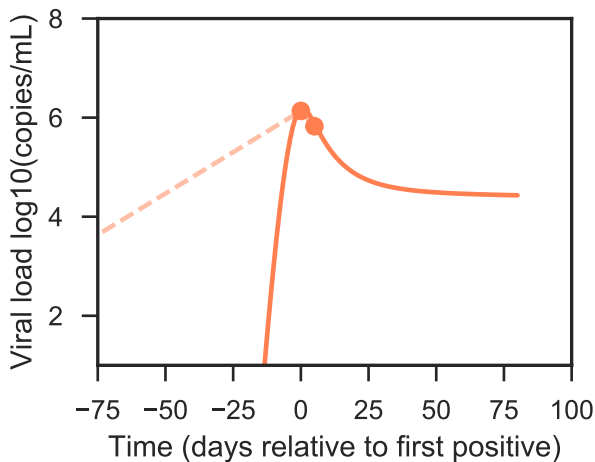

704-1712, IC80(Is)=39.24 $\mu$ g/mL

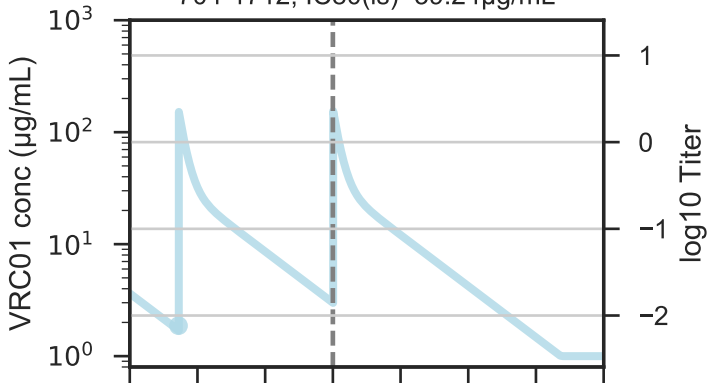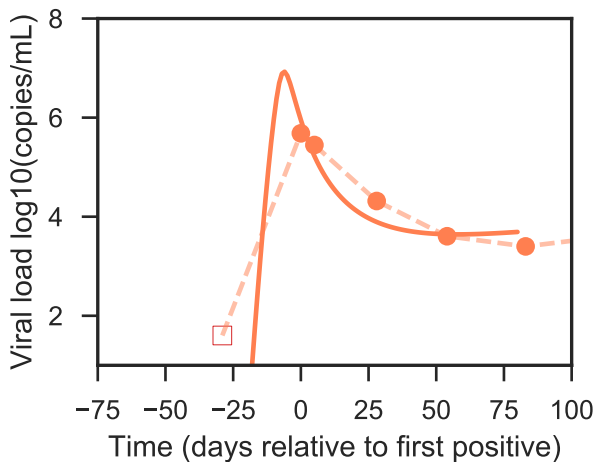

704-1716, IC80(Is)=4.78 $\mu$ g/mL

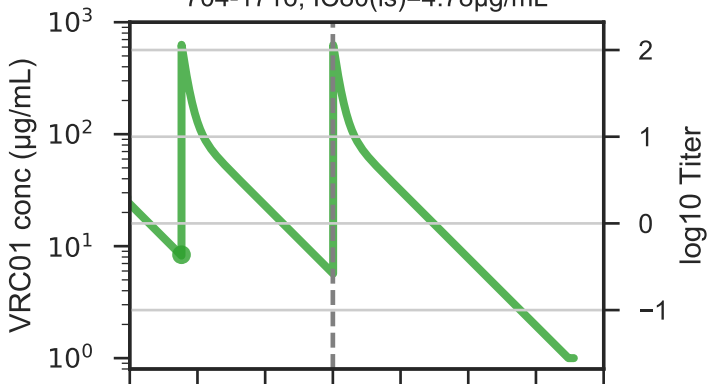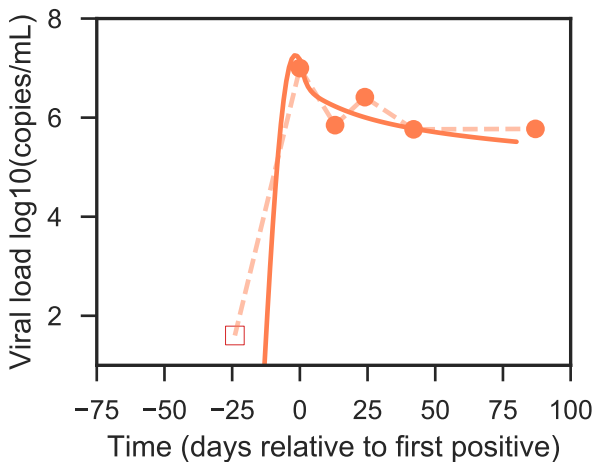

704-1731, IC80(Is)=1.0 $\mu$ g/mL

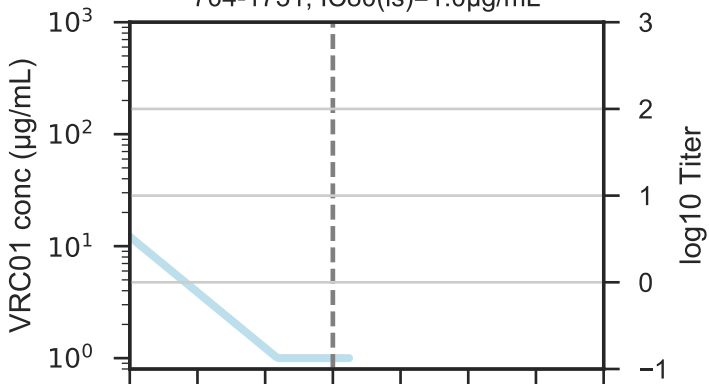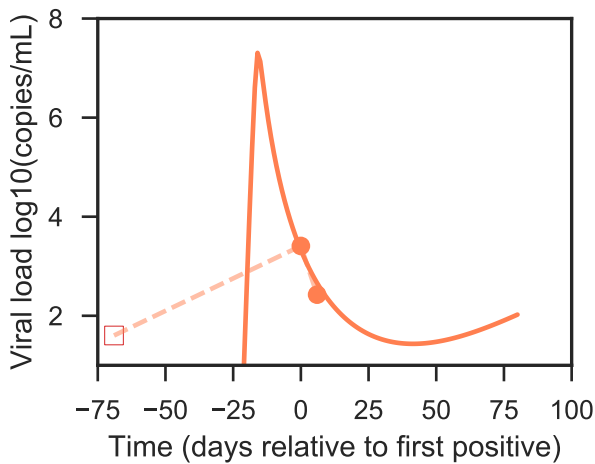

704-1739, IC80(Is)=32.11 $\mu$ g/mL

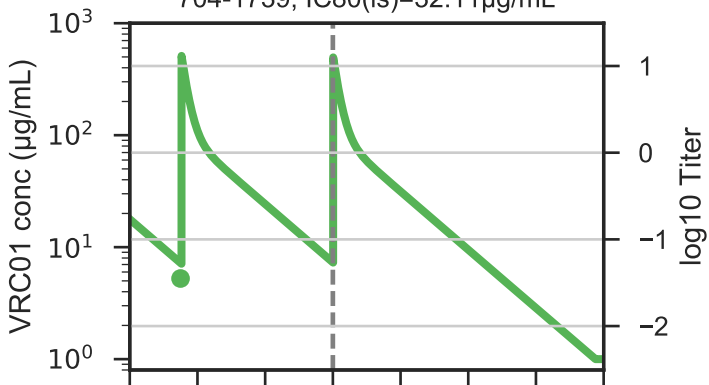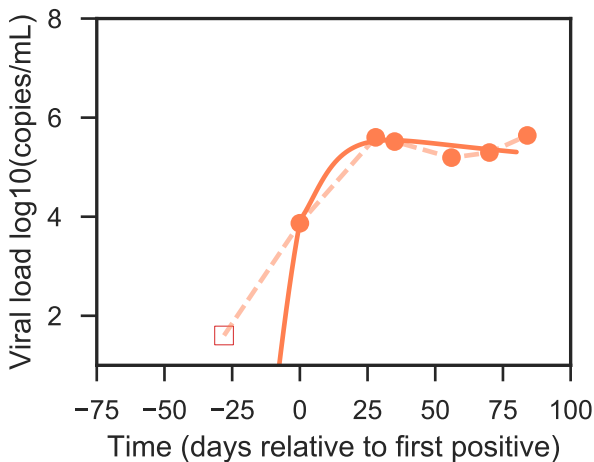

704-1802, IC80(Is)=2.39 $\mu$ g/mL

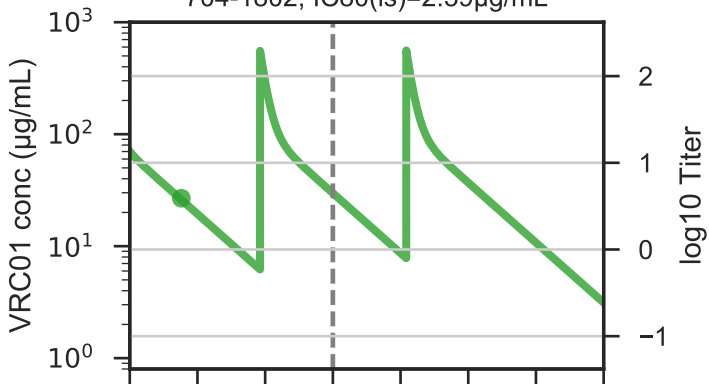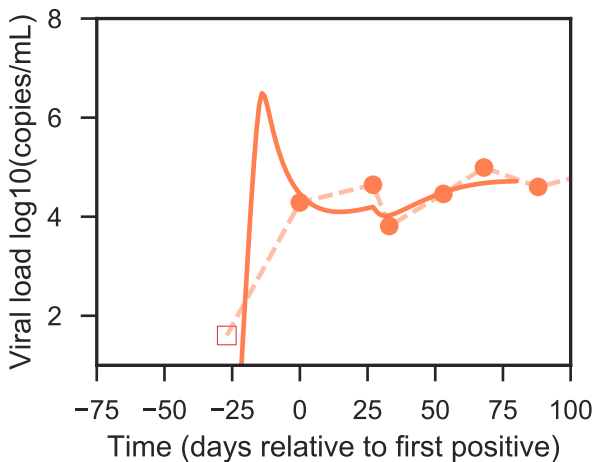

704-1941, IC80(Is)=6.91 $\mu$ g/mL

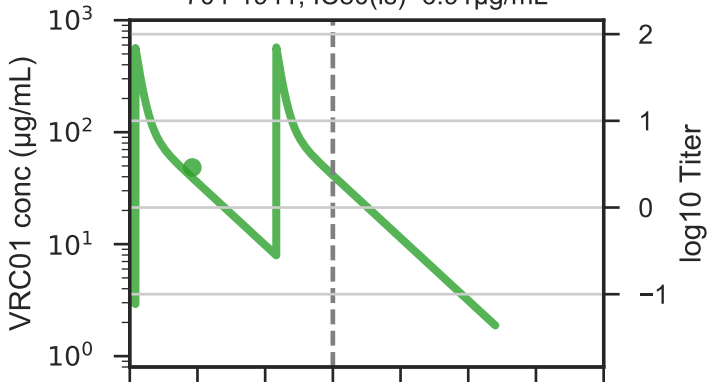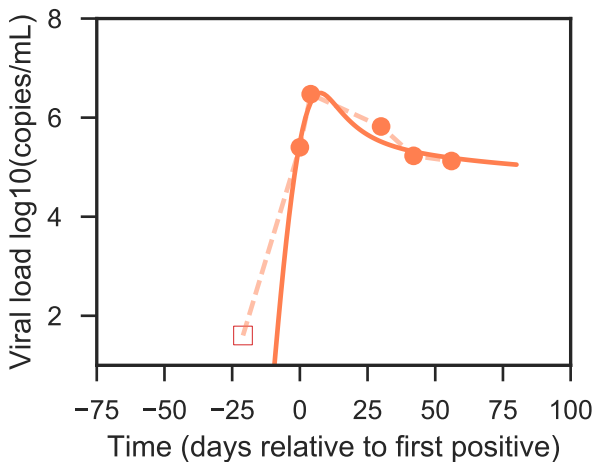



704-2061, IC80(Is)=1.44 $\mu$ g/mL

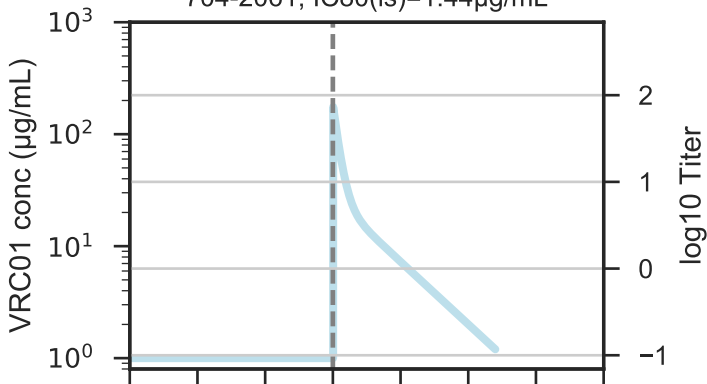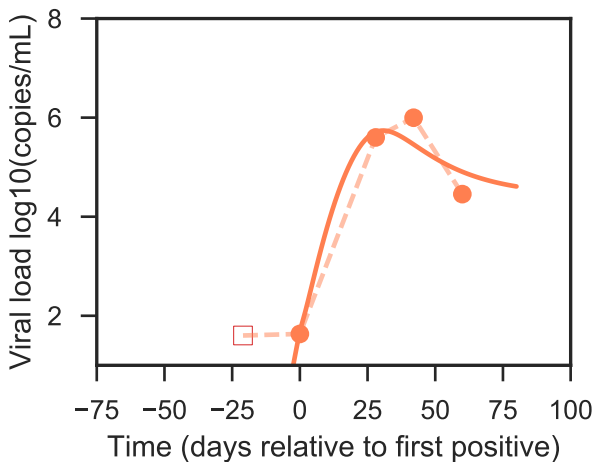

704-2150, IC80(Is)=18.23 $\mu$ g/mL

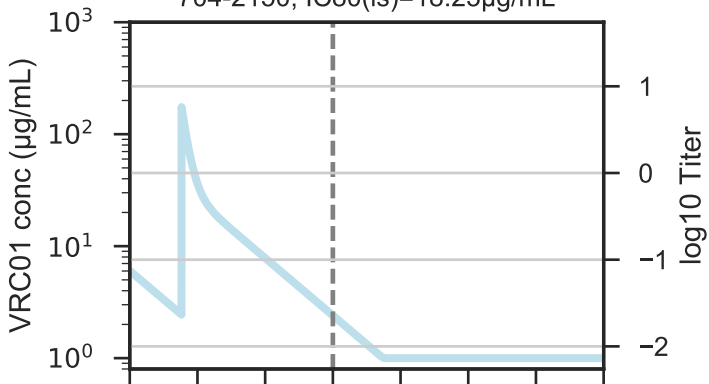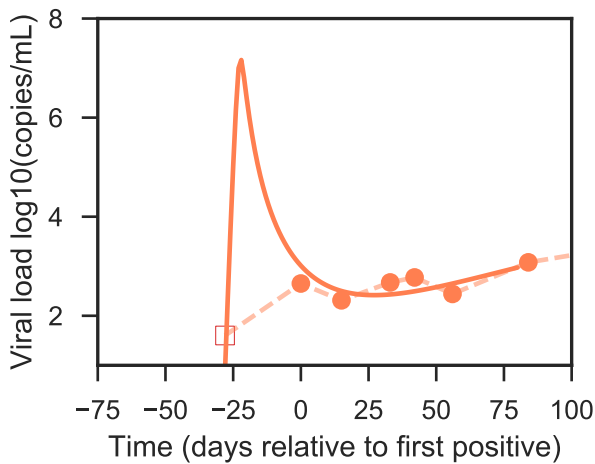

704-2164, IC80(Is)=11.65 $\mu$ g/mL

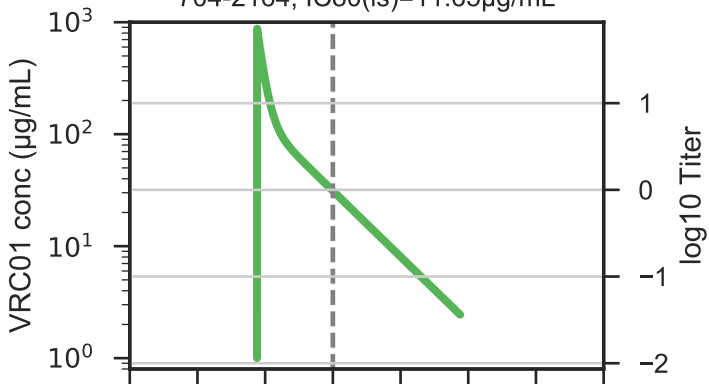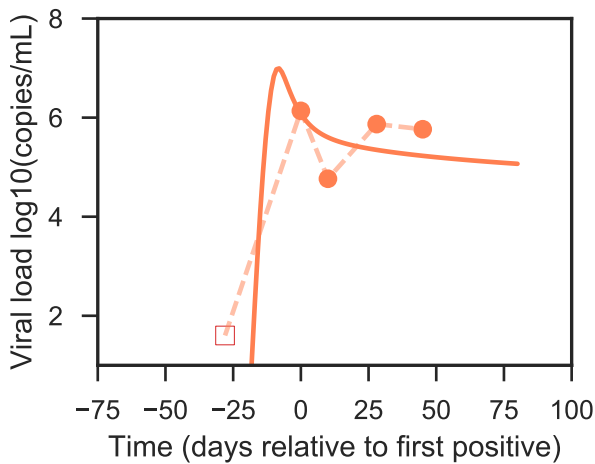

704-2189, IC80(Is)=1.69 $\mu$ g/mL

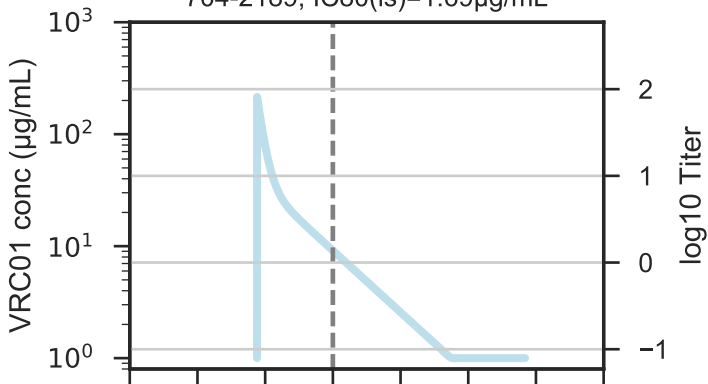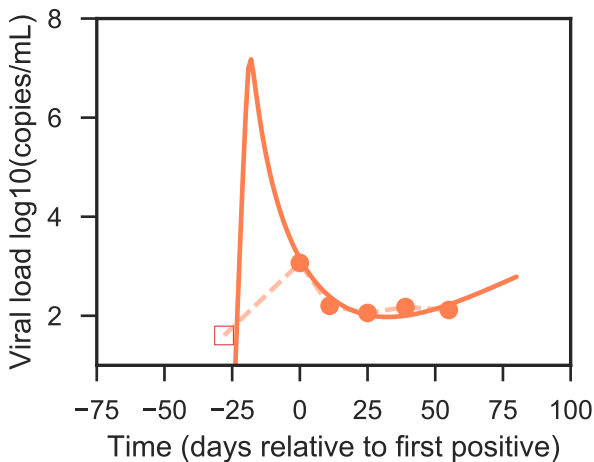

704-2315, IC80(Is)=3.42 $\mu$ g/mL

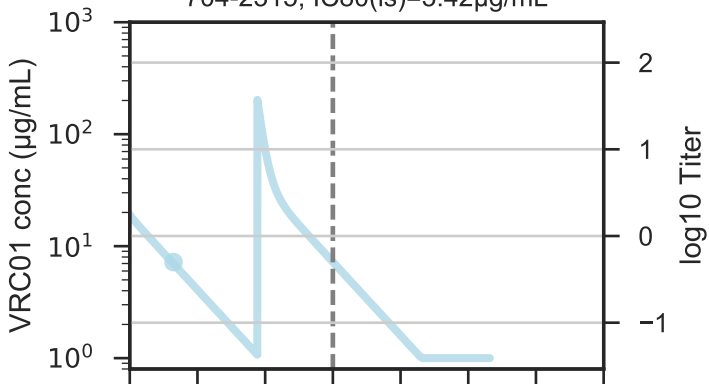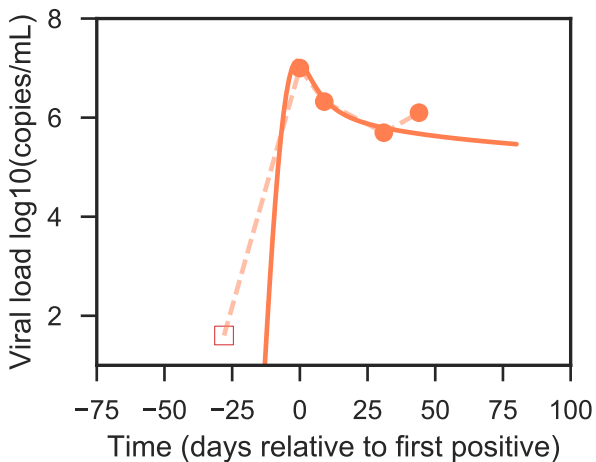

704-2407, IC80(Is)=1.44 $\mu$ g/mL

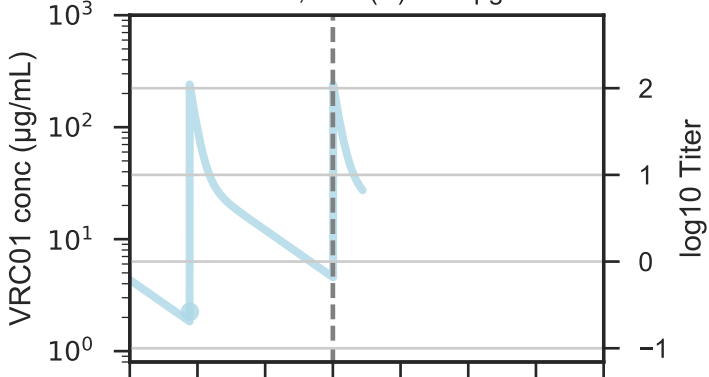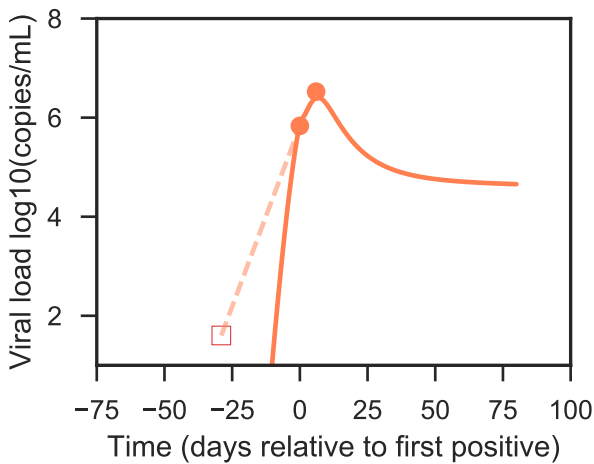

704-2408, IC80(Is)=1.53 $\mu$ mL

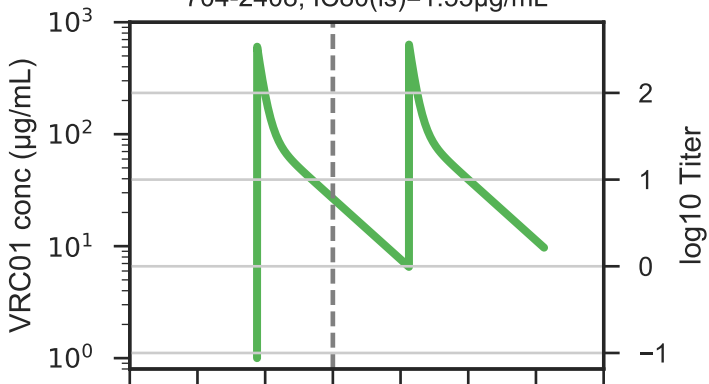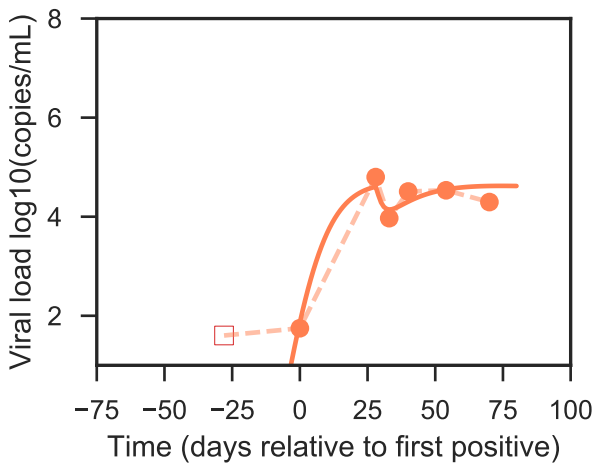

704-2495, IC80(Is)=7.4 $\mu$ g/mL

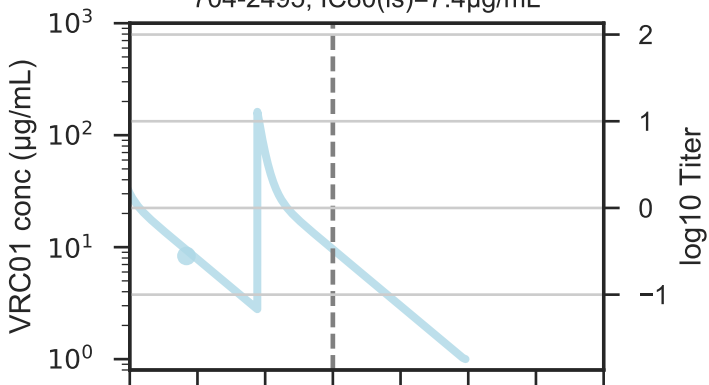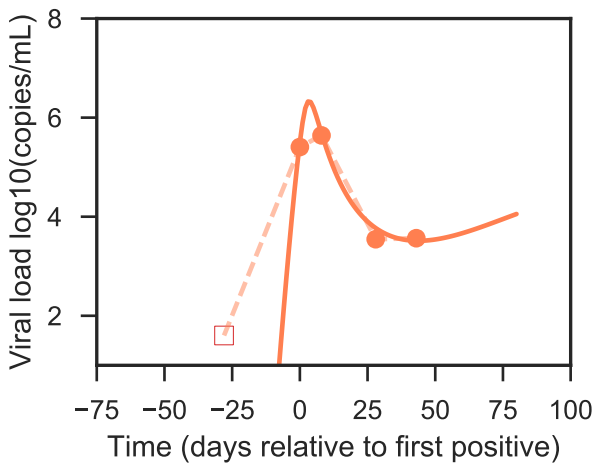



704-2531, IC80(Is)=4.75 $\mu$ g/mL

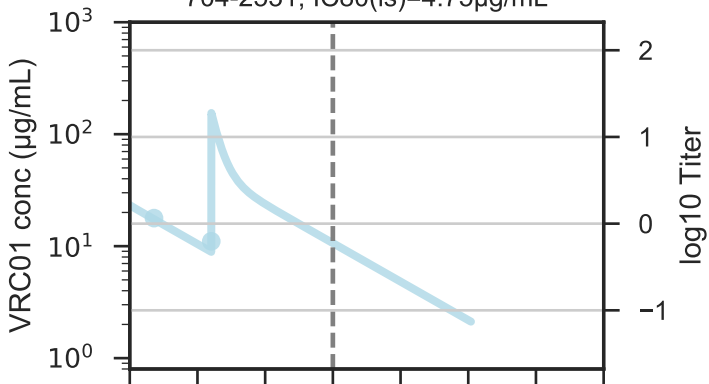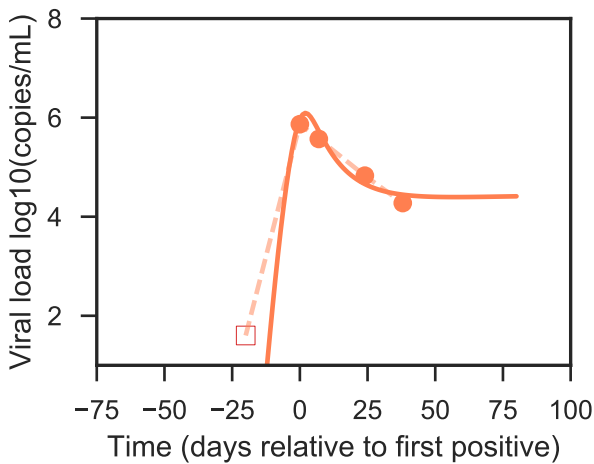

704-2624, IC80(Is)=100.0 $\mu$ g/mL

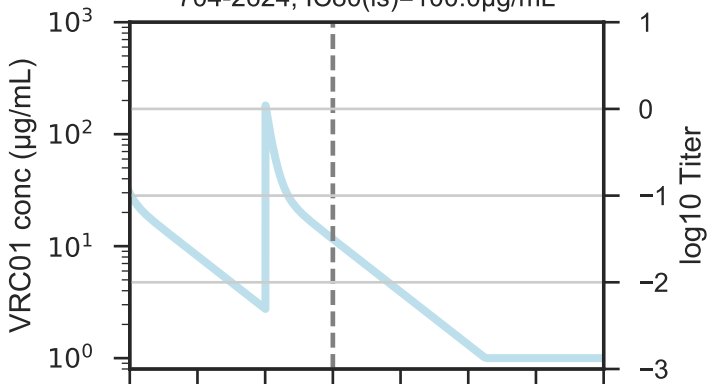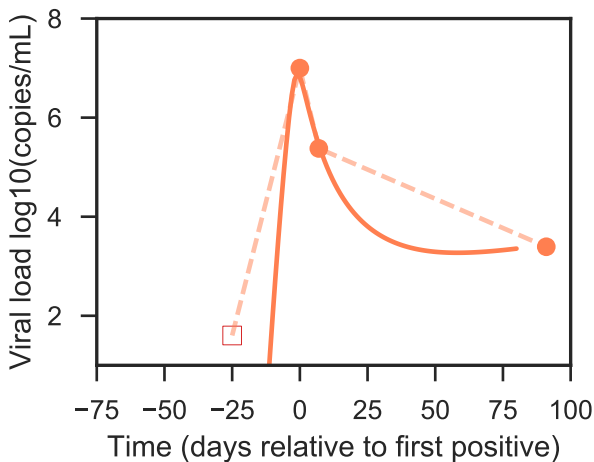

704-2625, IC80(Is)=100.0 $\mu$ g/mL

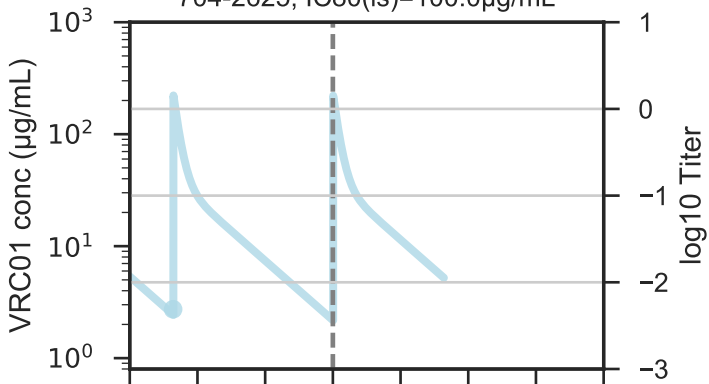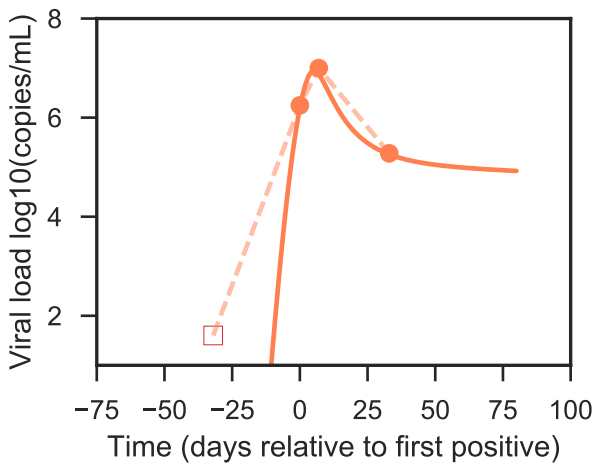

704-2643, IC80(Is)=100.0 $\mu$ g/mL

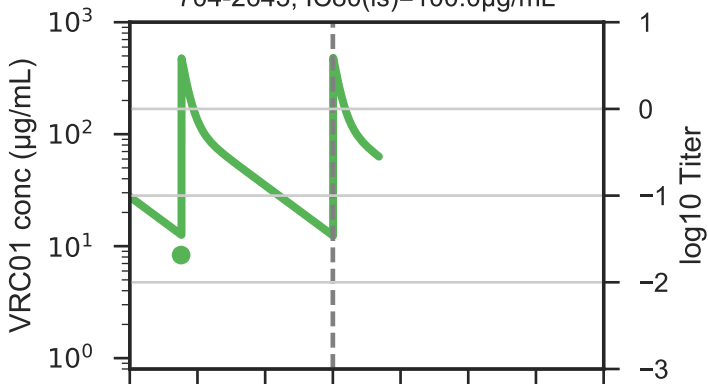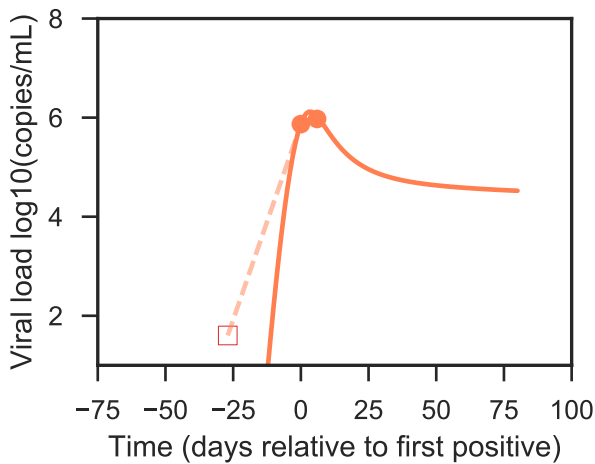

704-2685, IC80(Is)=7.83 $\mu$ g/mL

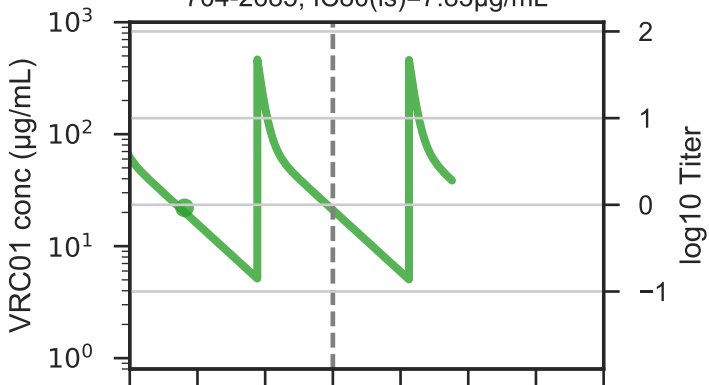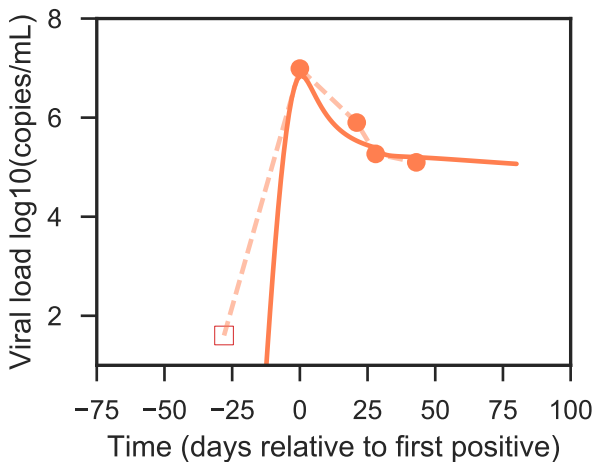

704-2777, IC80(Is)=31.97 $\mu$ g/mL

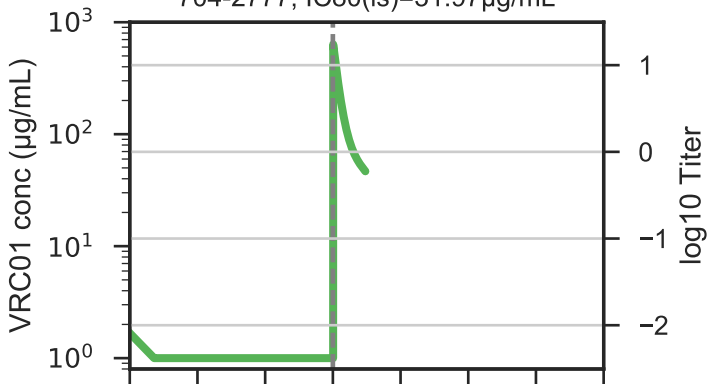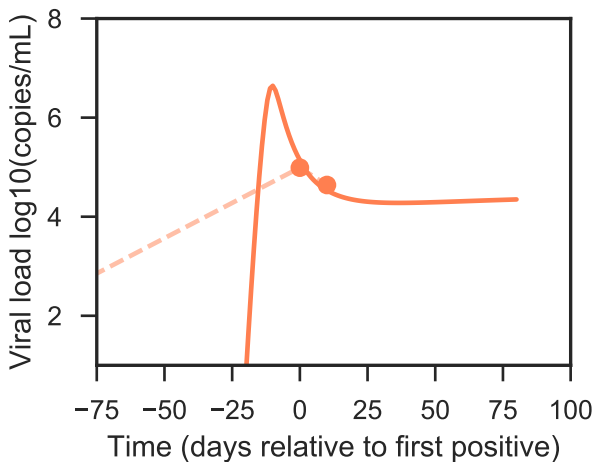

704-2901, IC80(Is)=13.48 $\mu$ g/mL

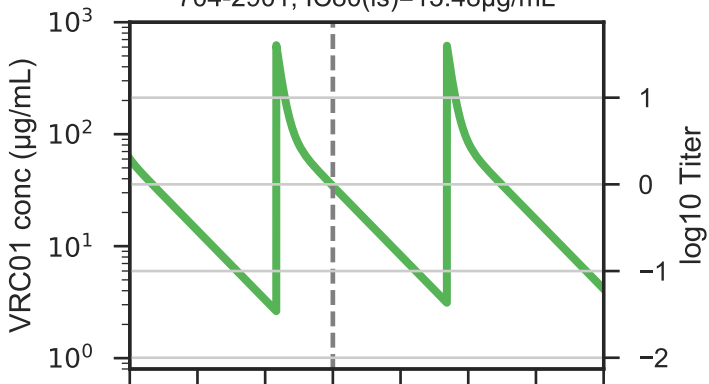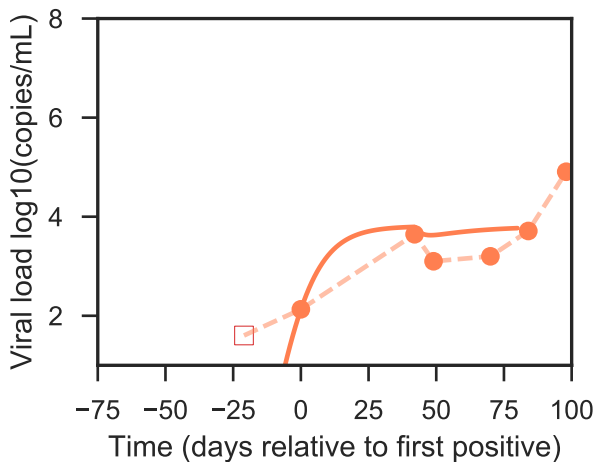

704-3039, IC80(Is)=8.5 $\mu$ g/mL

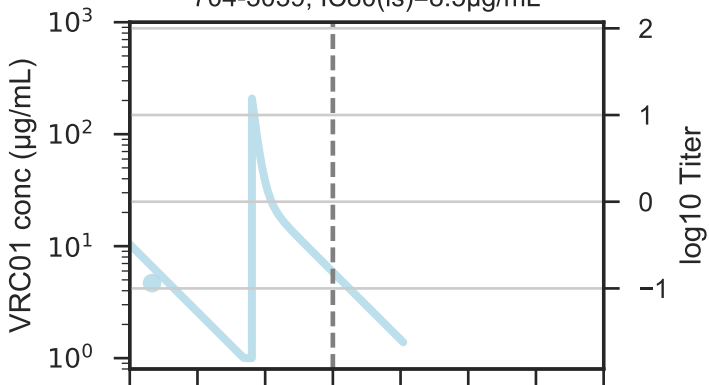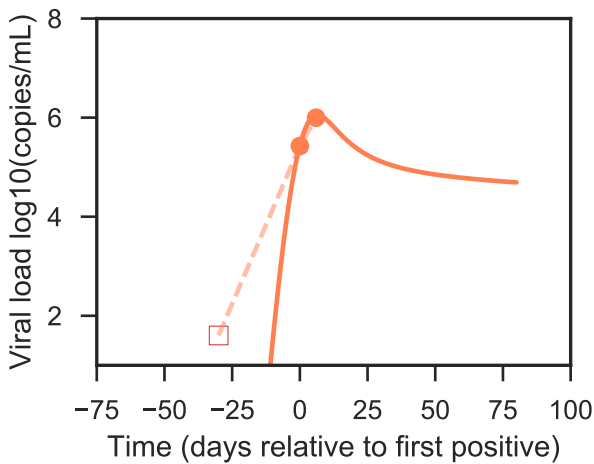



704-3083, IC80(Is)=100.0 $\mu$ g/mL

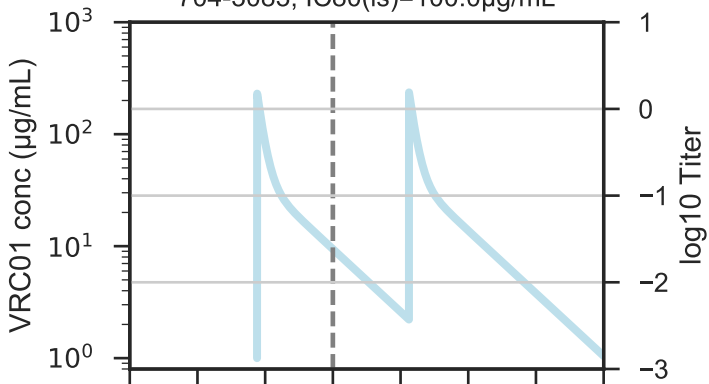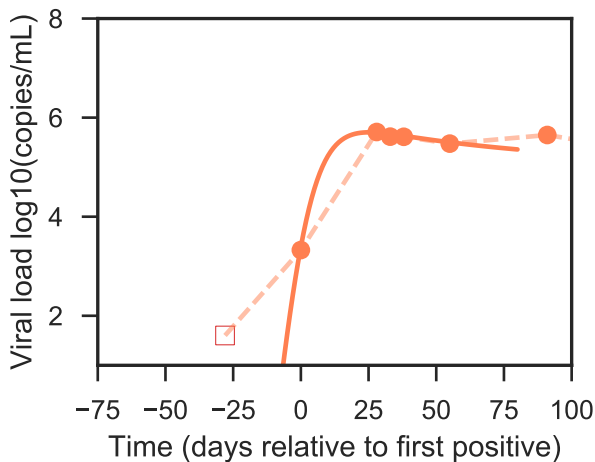

703-0520, IC80(Is)=0.43 $\mu$ g/mL

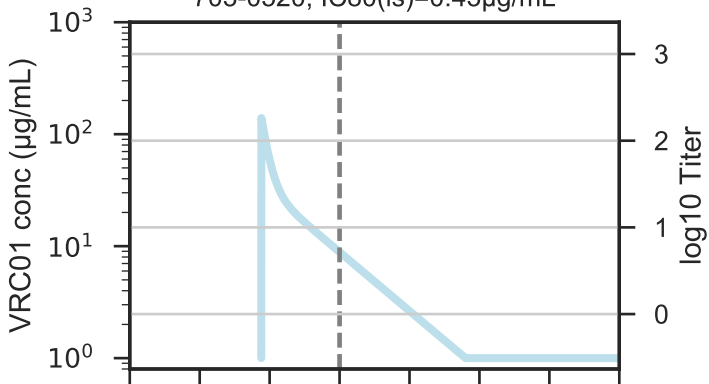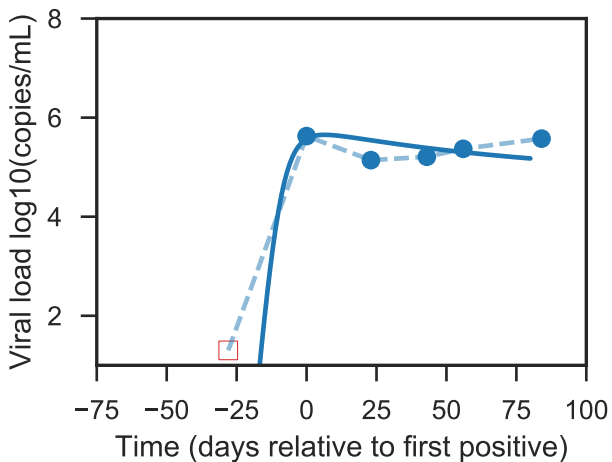

703-0578, IC80(Is)=0.69 $\mu$ g/mL

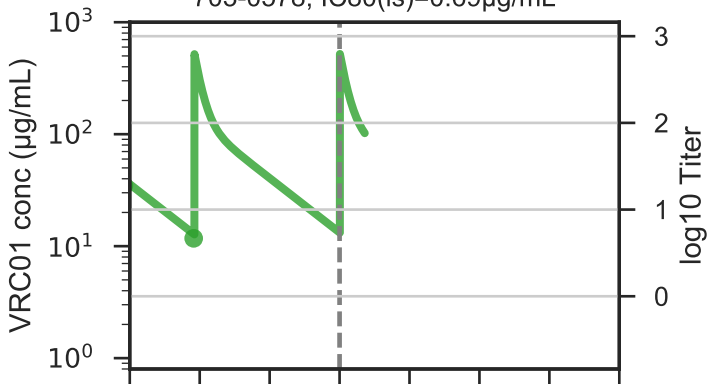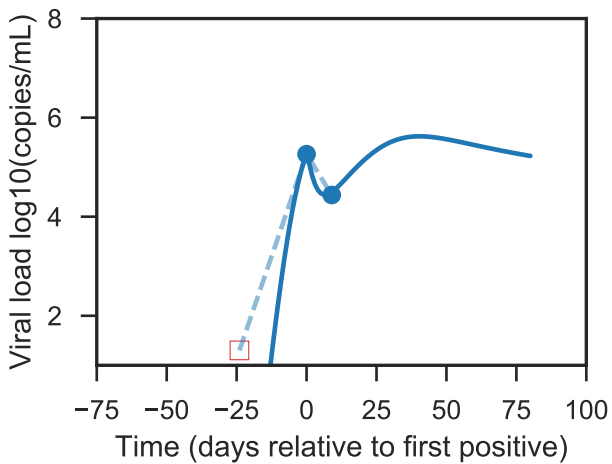

703-1551, IC80(Is)=0.82 $\mu$ g/mL

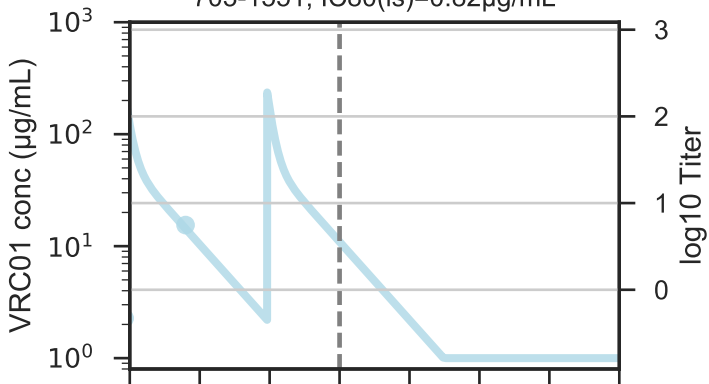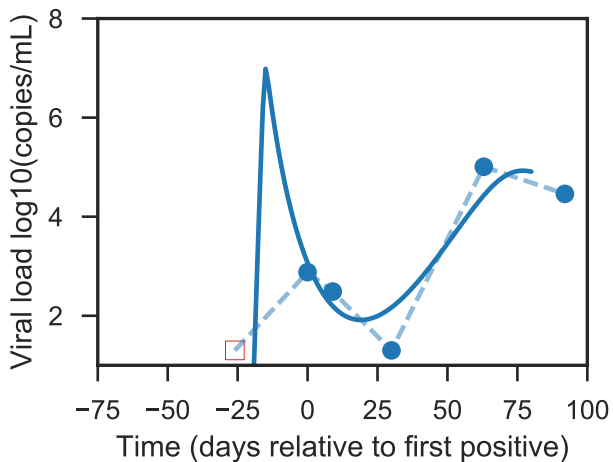

704-0592, IC80(Is)=0.98 $\mu$ g/mL

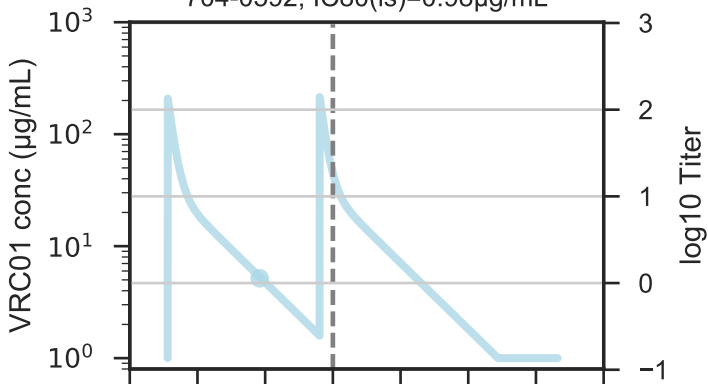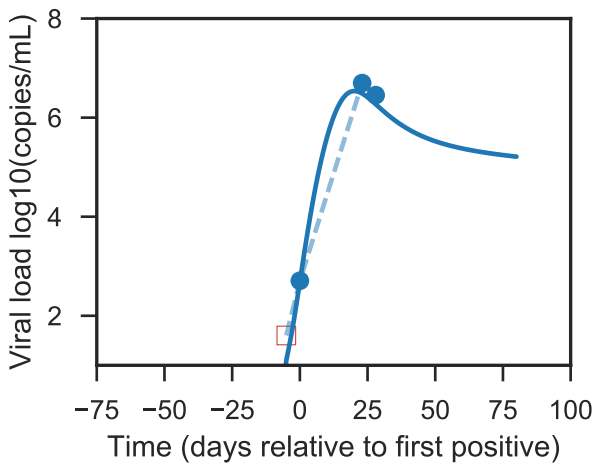

704-1350, IC80(Is)=0.7 $\mu$ g/mL

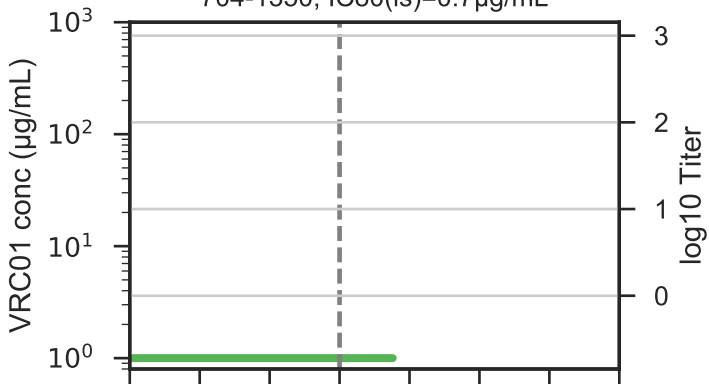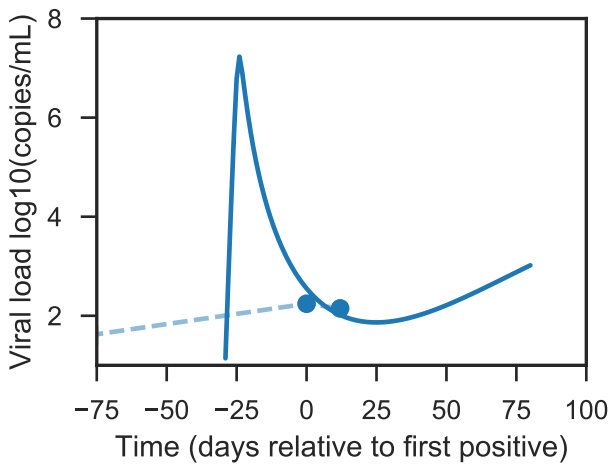

704-1747, IC80(Is)=0.4 $\mu$ g/mL

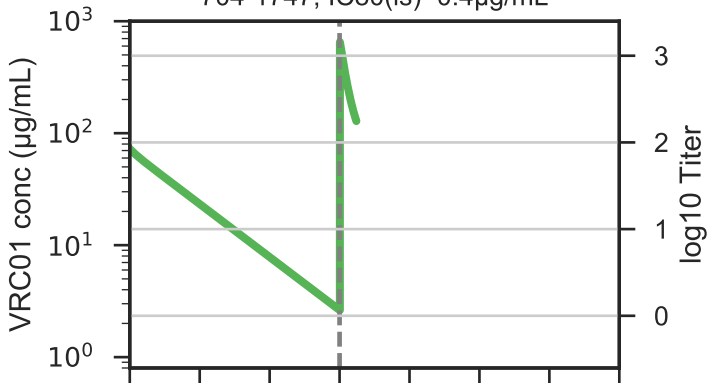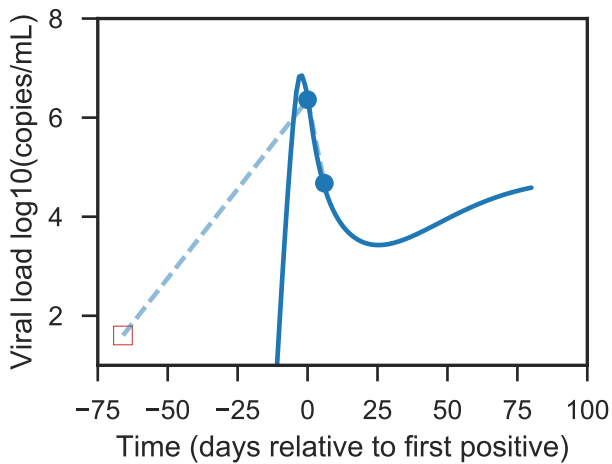

704-1969, IC80(Is)=0.47 $\mu$ g/mL

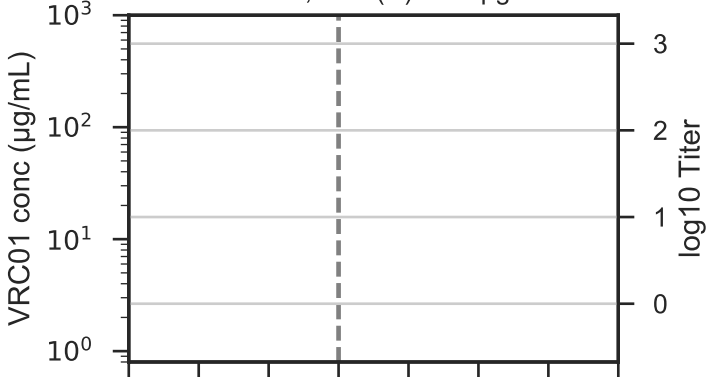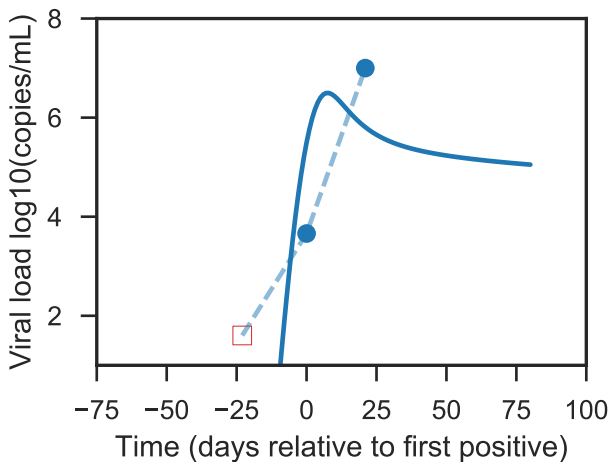



704-2536, IC80(Is)=0.77 $\mu$ g/mL

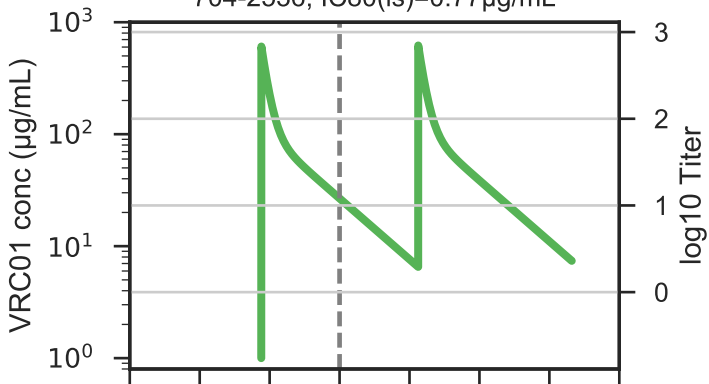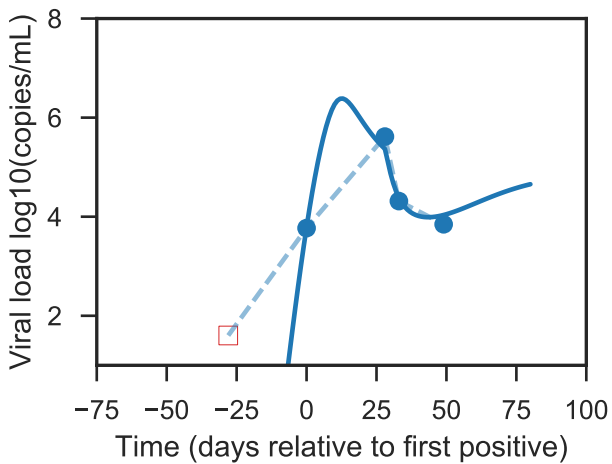

Supplement: 41467_2023_43384_MOESM4_ESM.pdf [file 41467_2023_43384_MOESM4_ESM.pdf]
