# Supplementary material for: High monoclonal neutralization titers reduced breakthrough HIV-1 viral loads in the Antibody Mediated Prevention trials
Source: PubMed Central journal article supplement (PMC10721814; doi:10.1038/s41467-023-43384-y), 2023-12-14

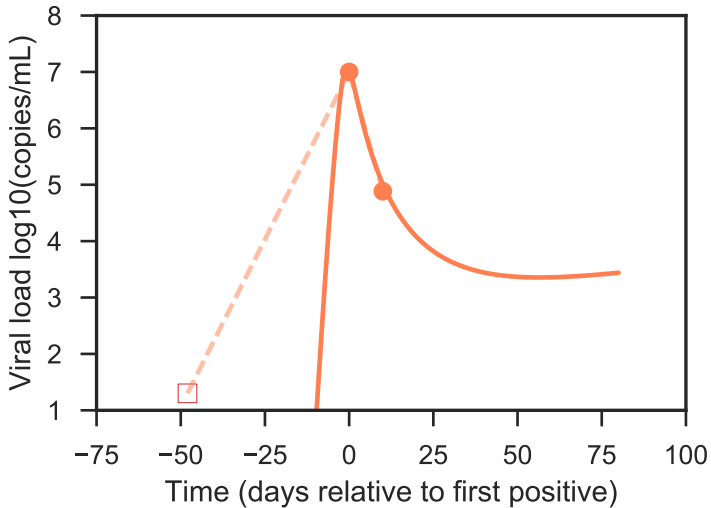

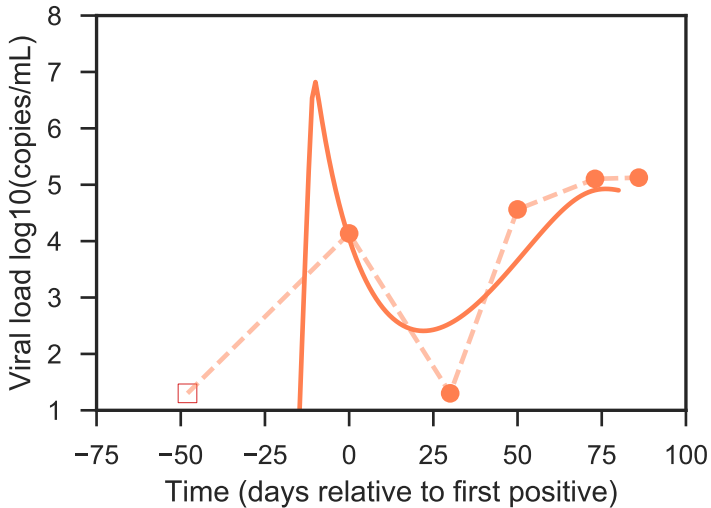

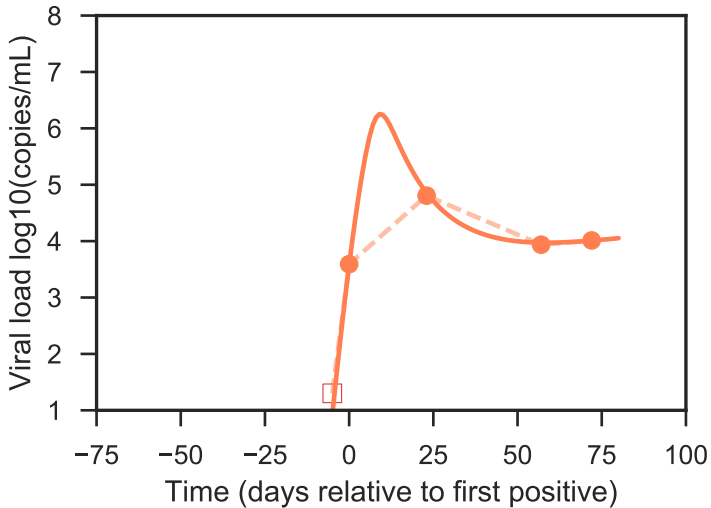

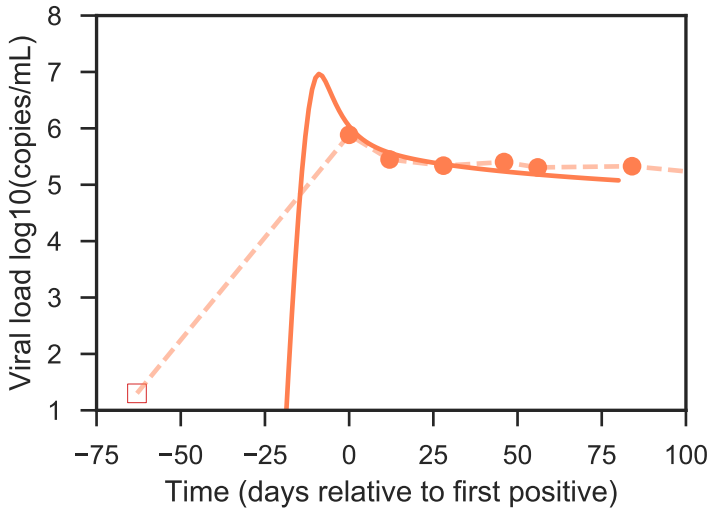

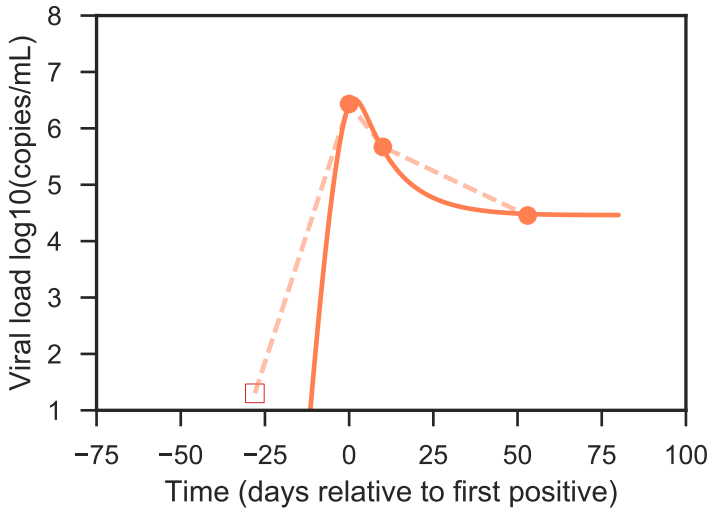

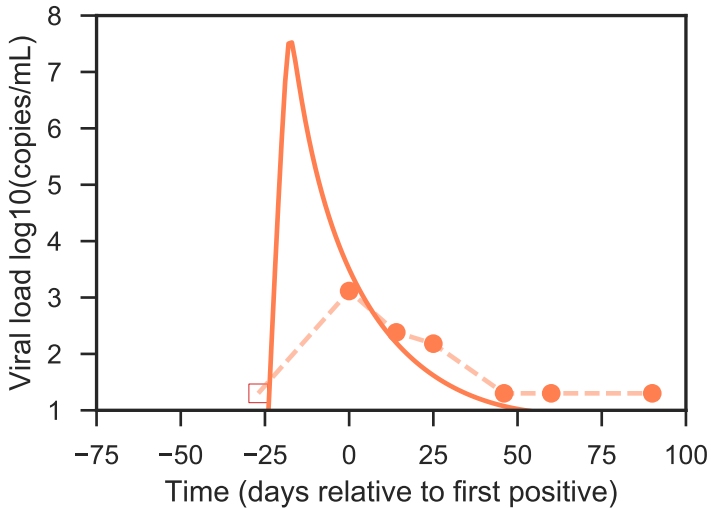

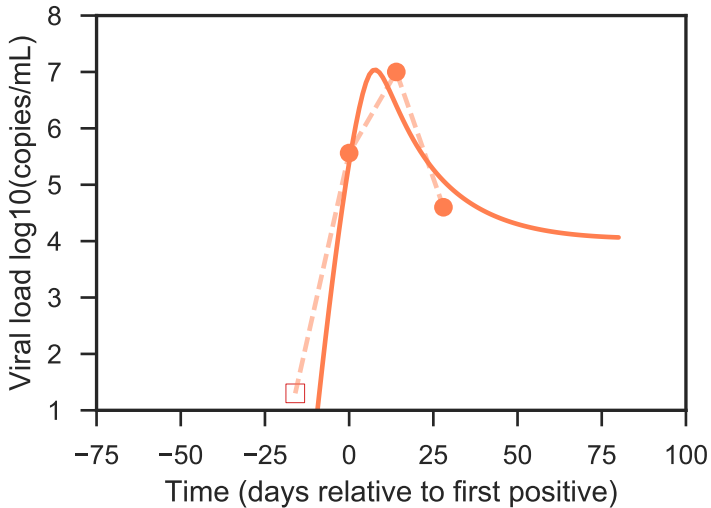

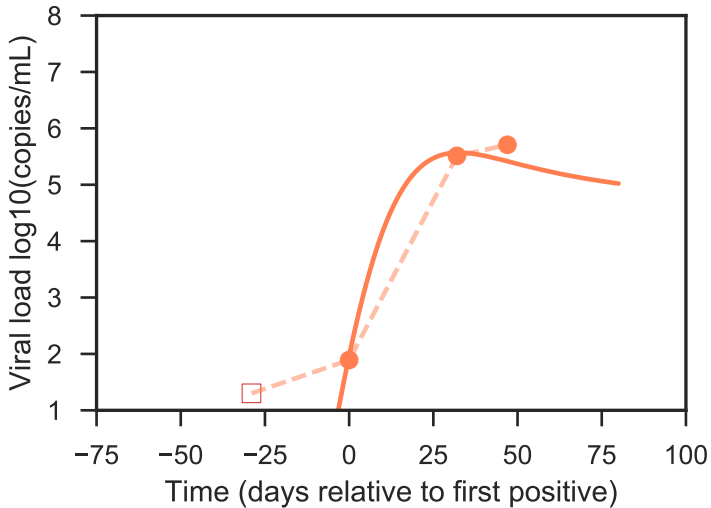



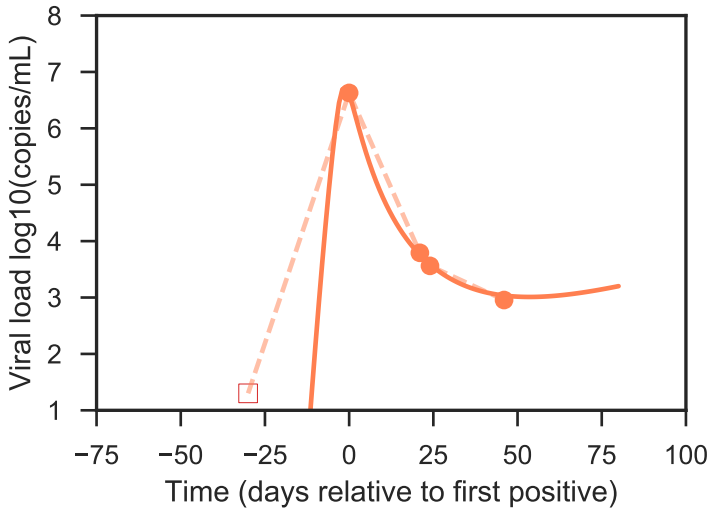

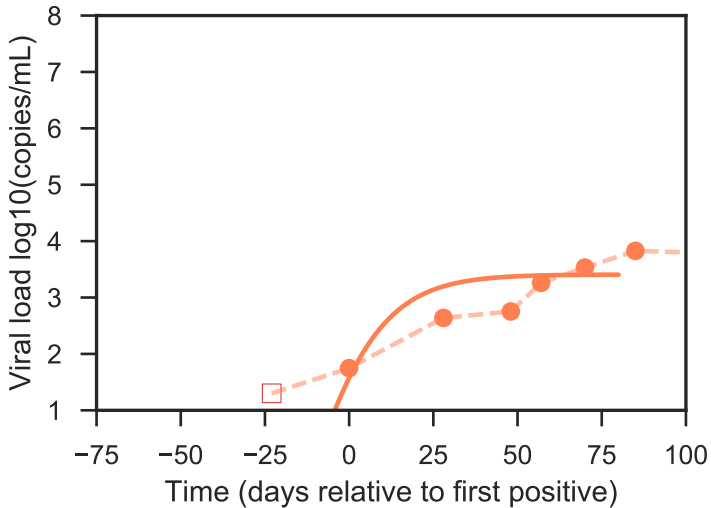

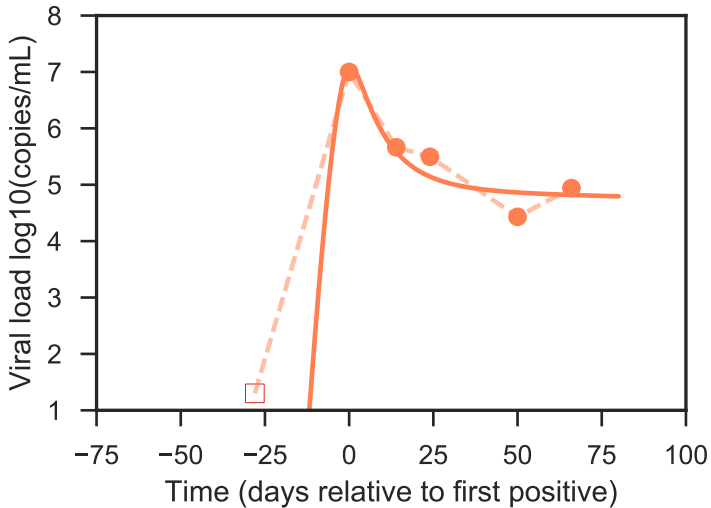

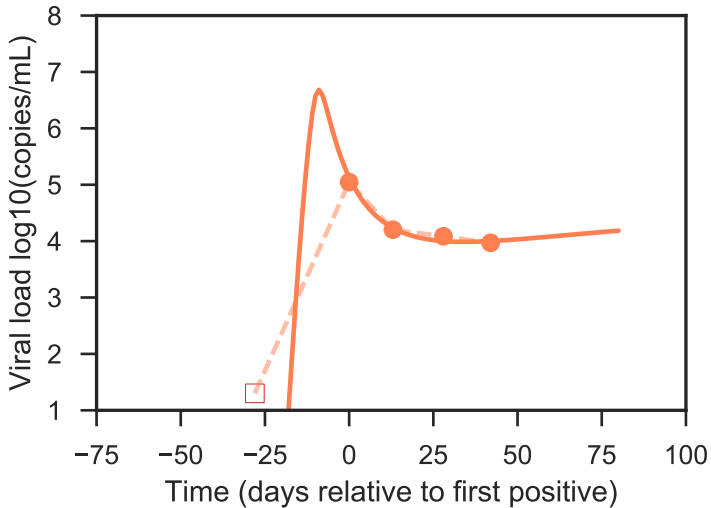

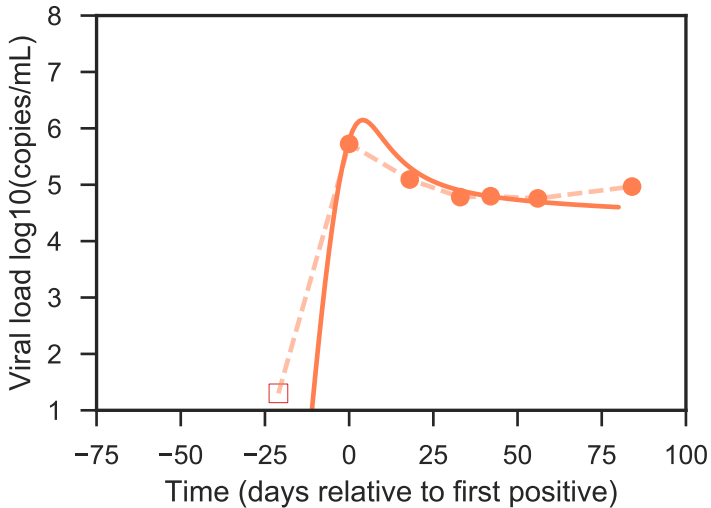

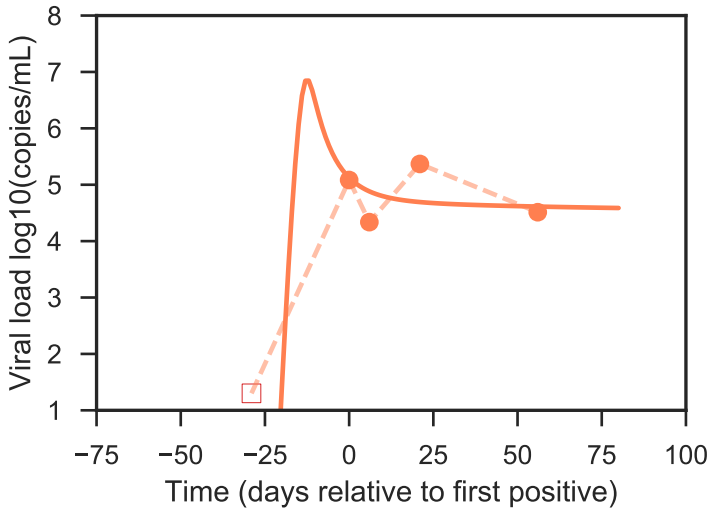

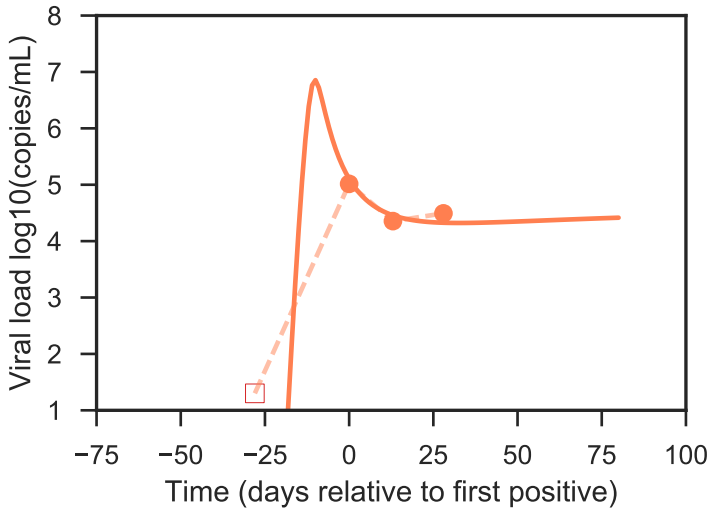

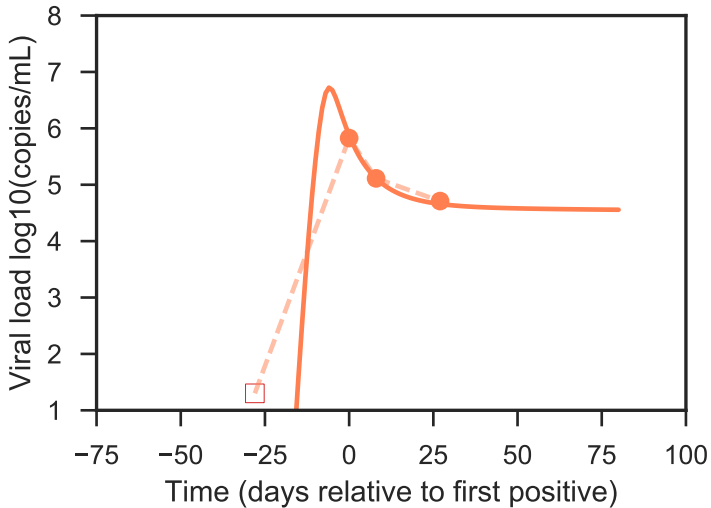



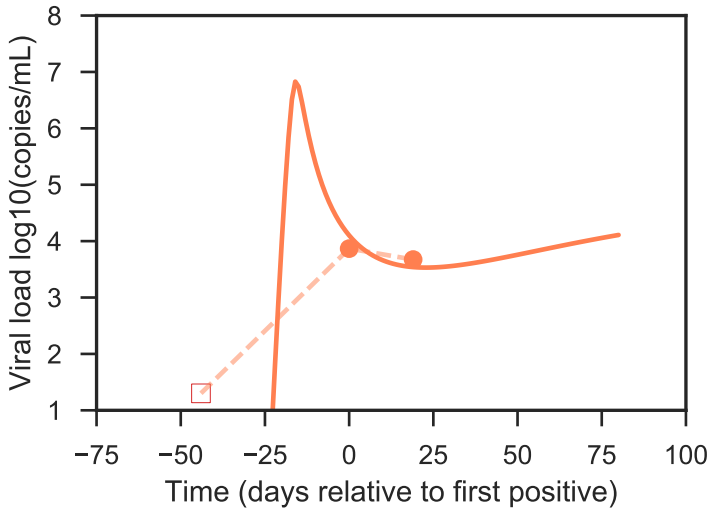

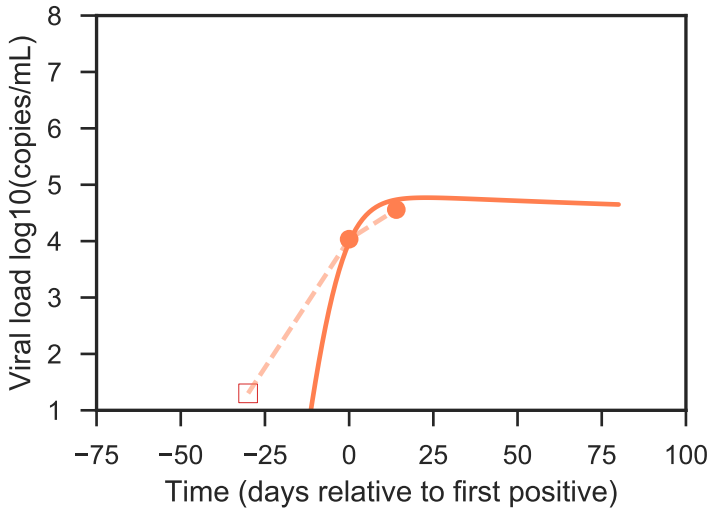

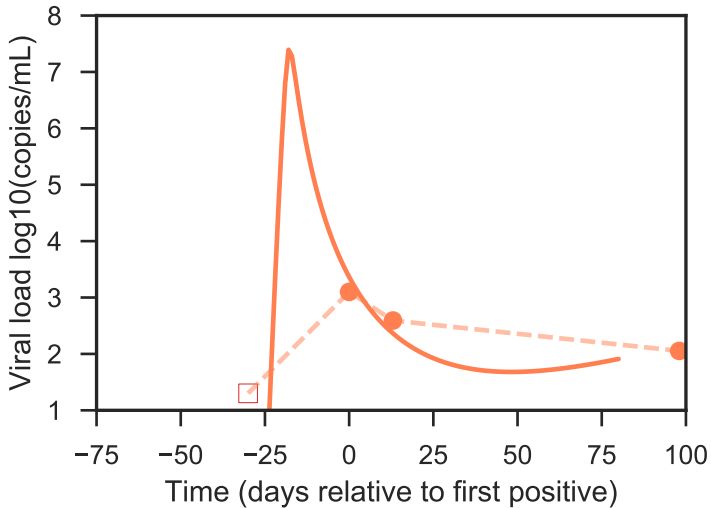

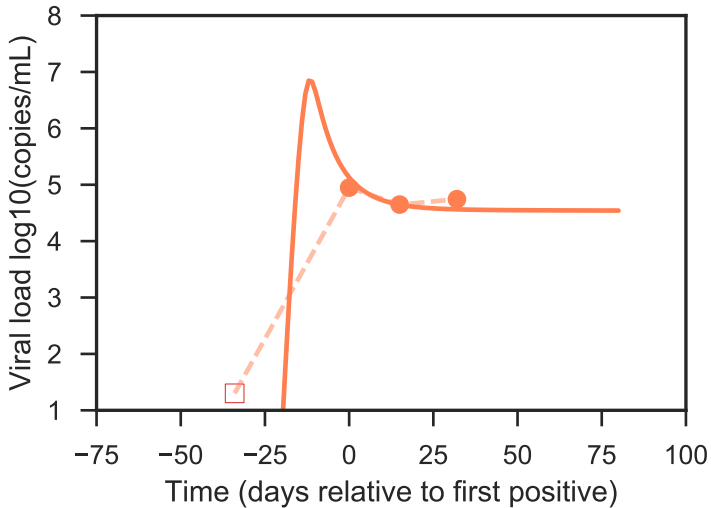

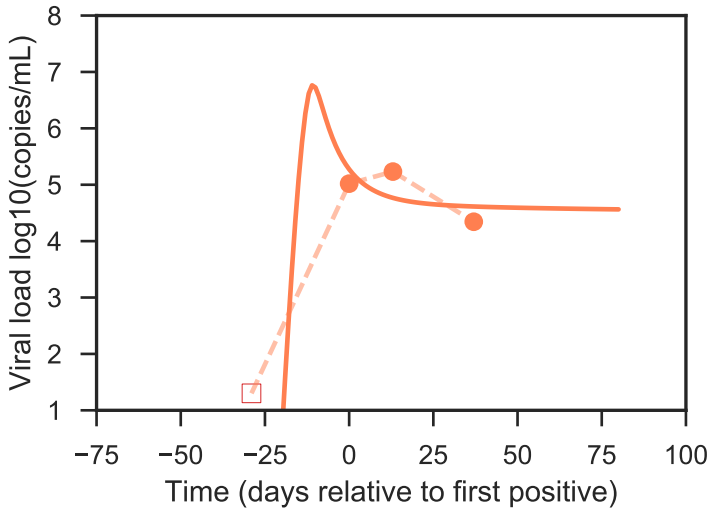

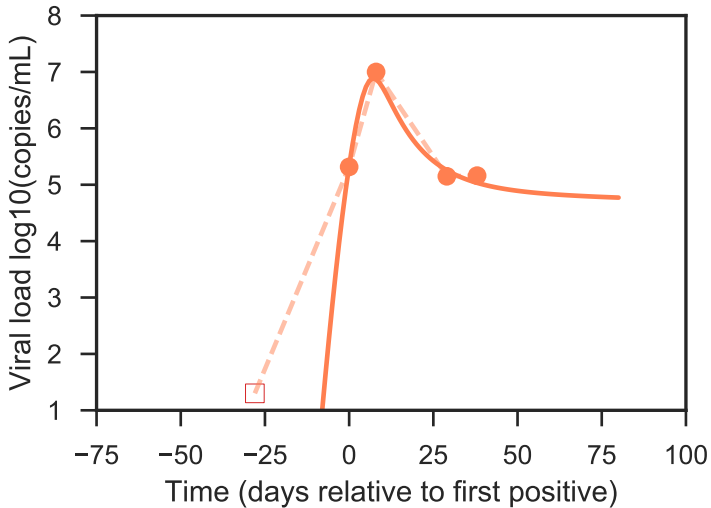

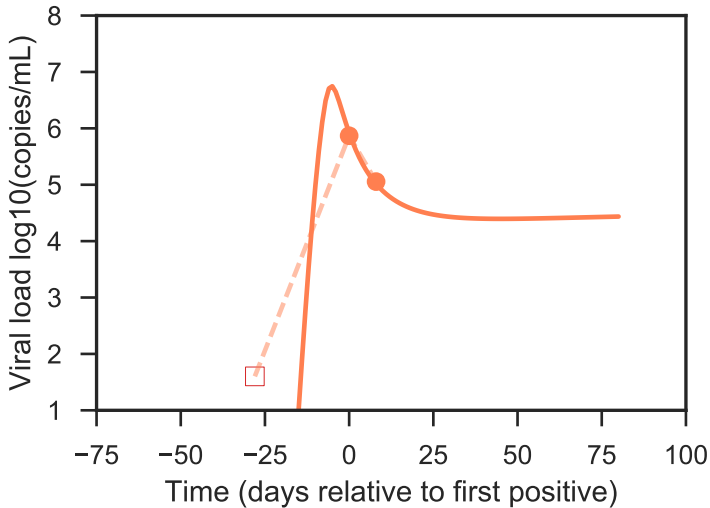

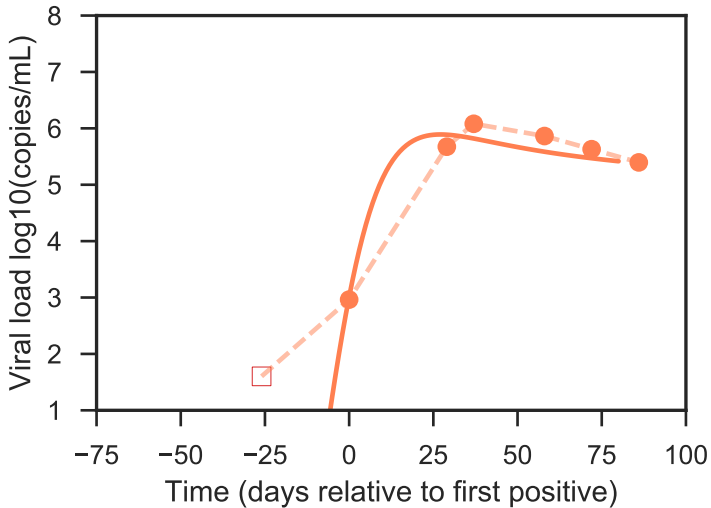



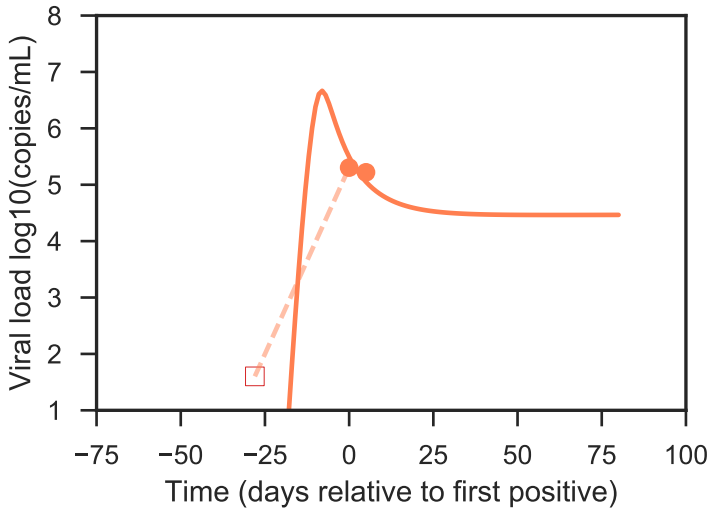

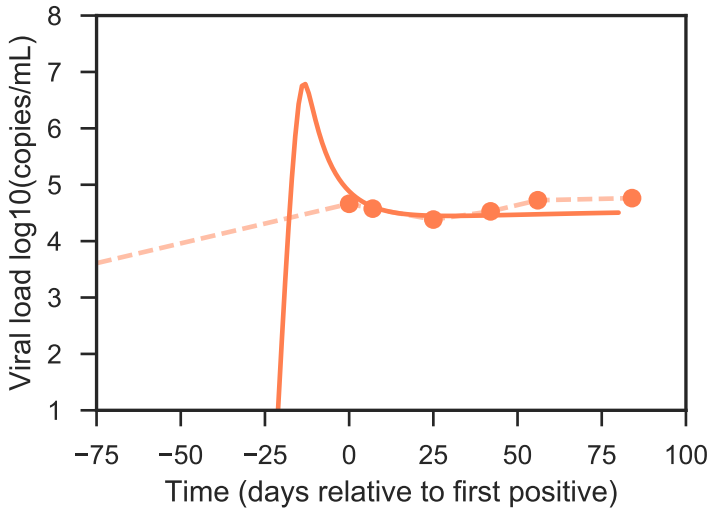

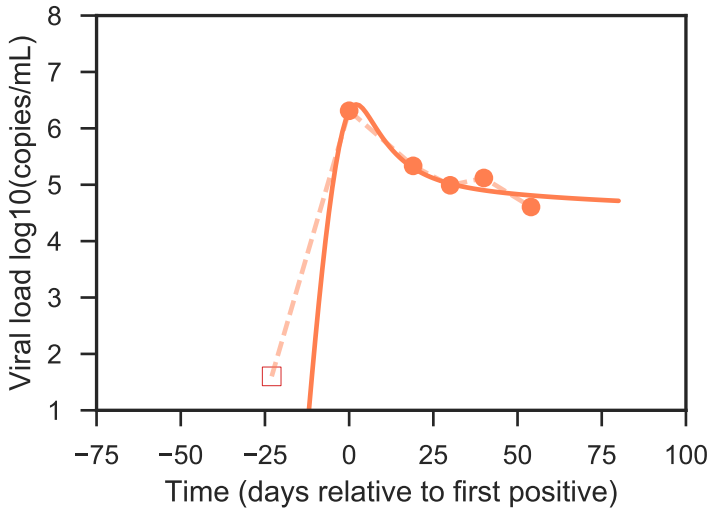

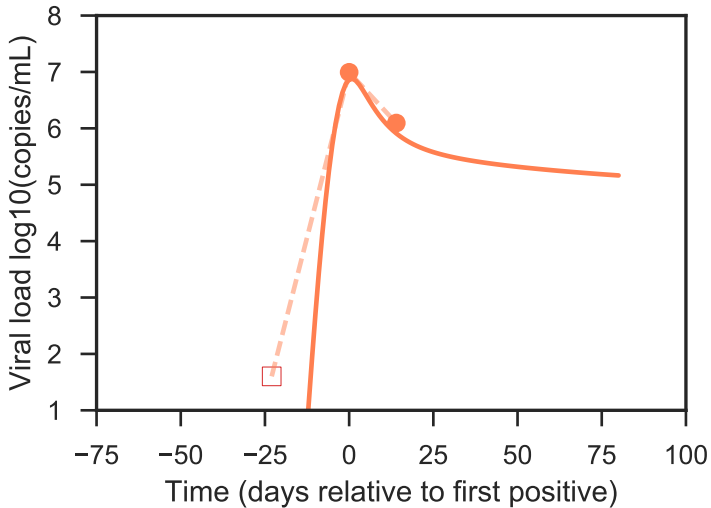

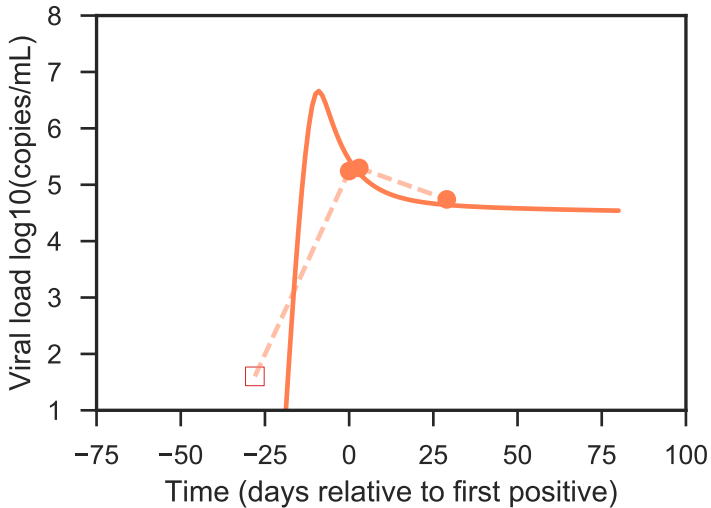

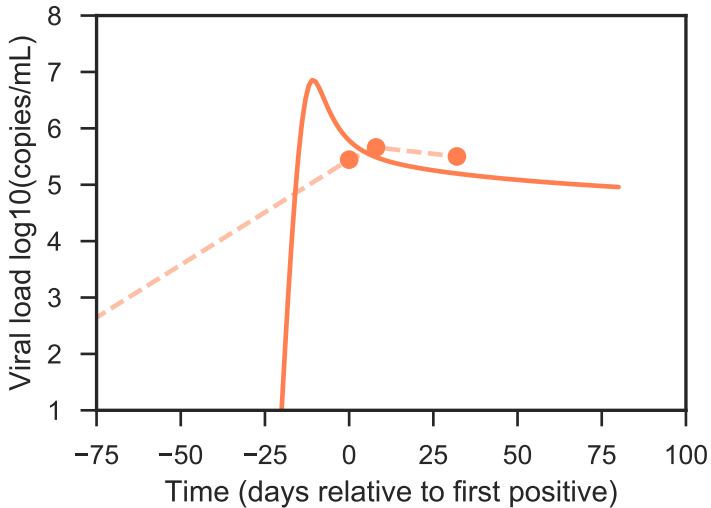

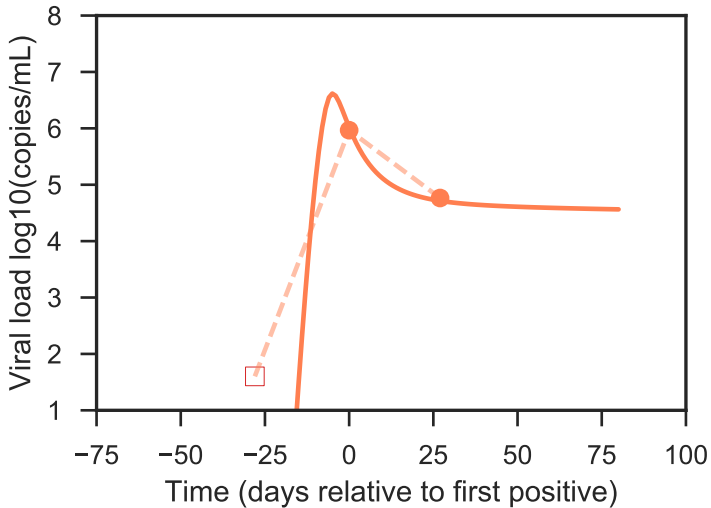

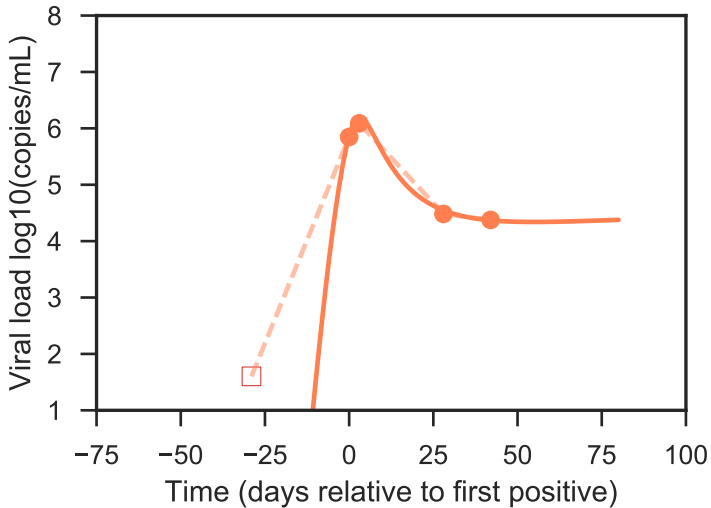



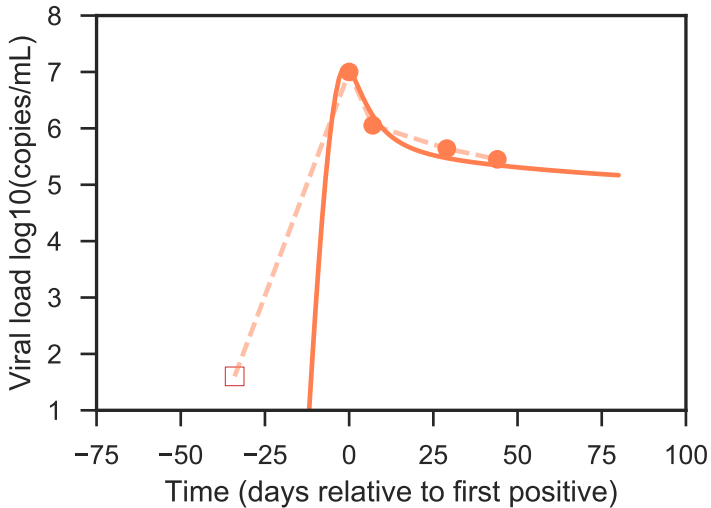

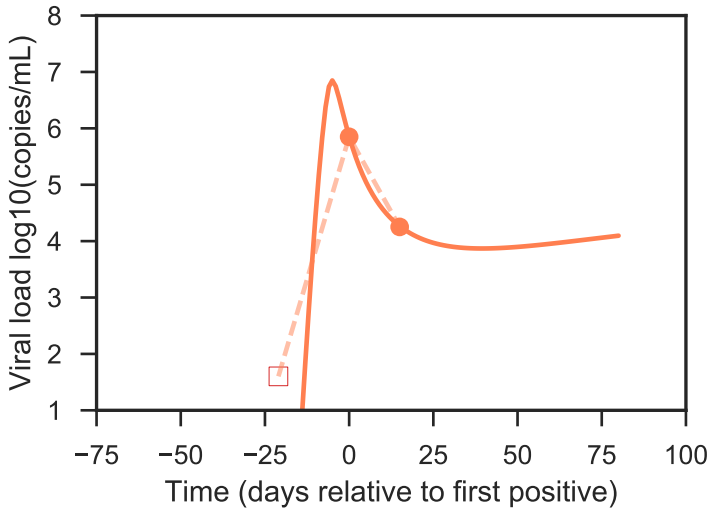

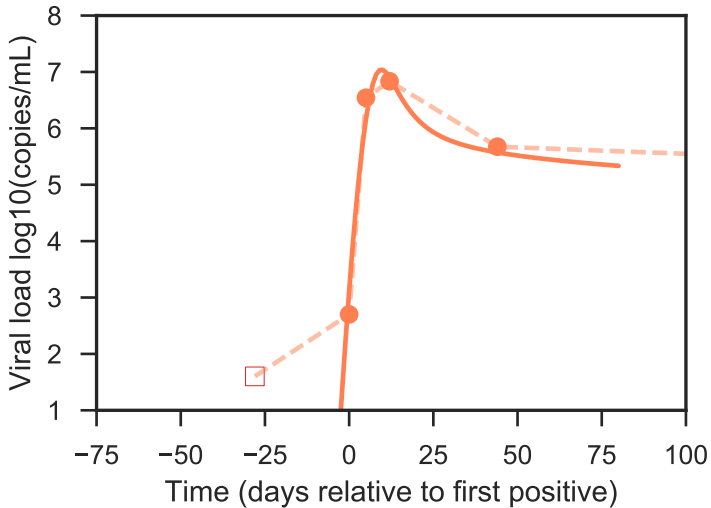

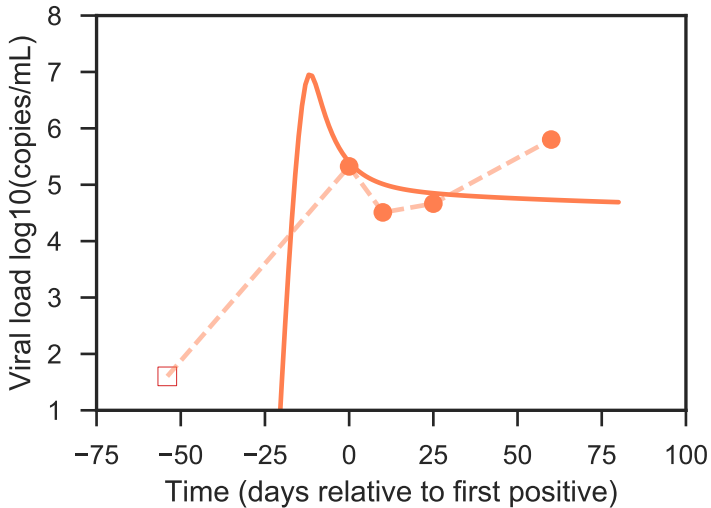

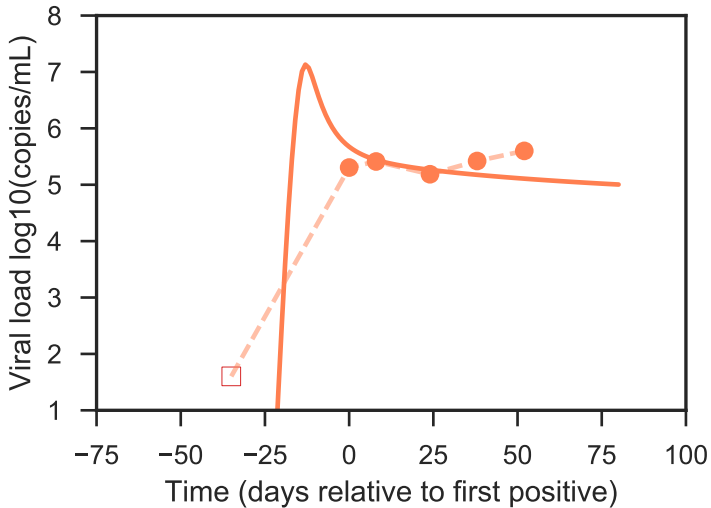

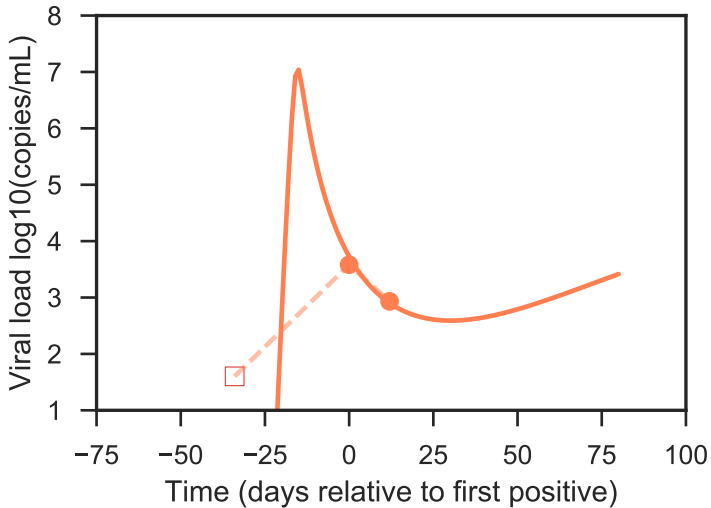

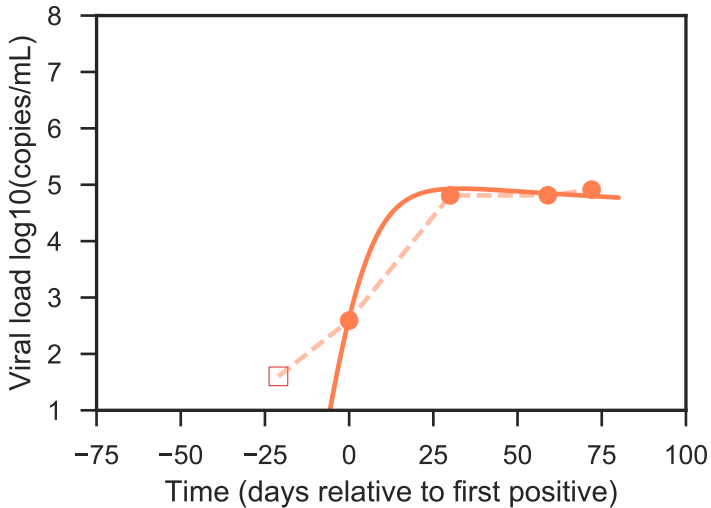

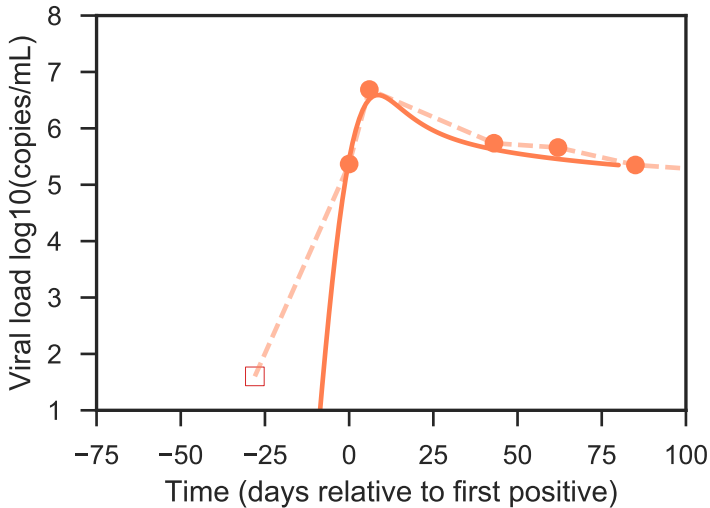



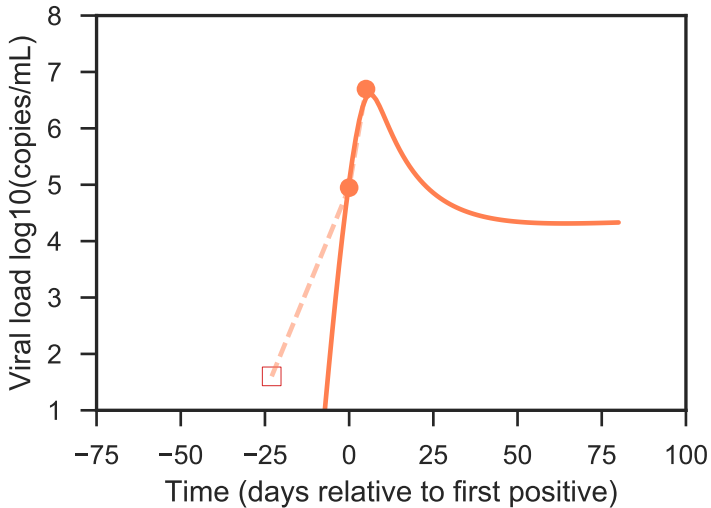

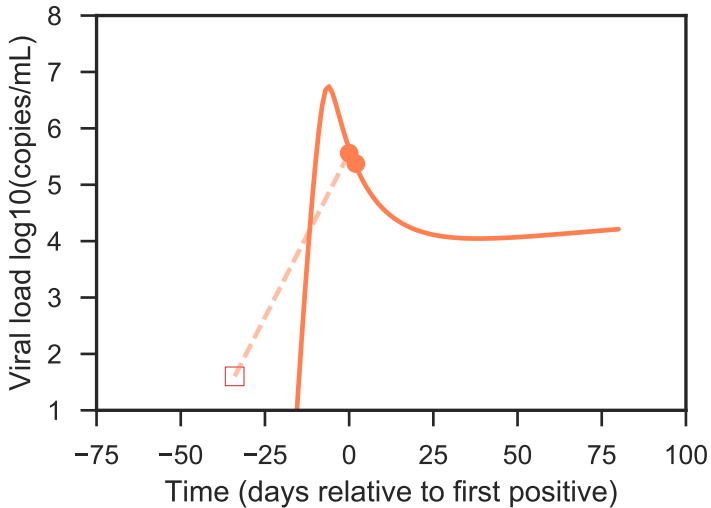

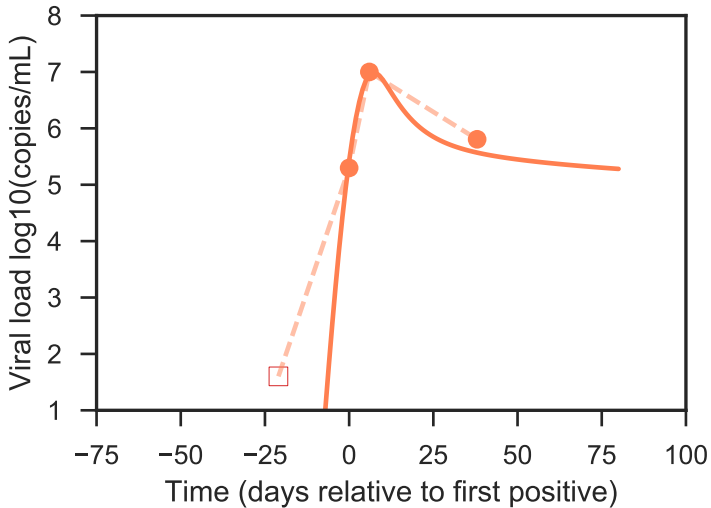

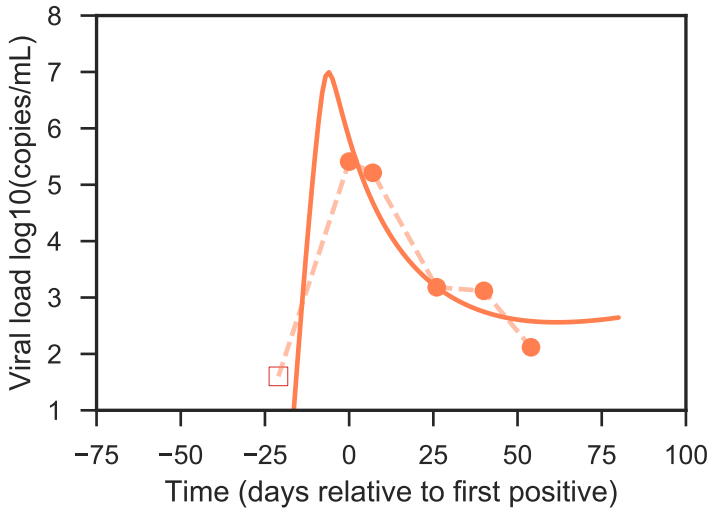

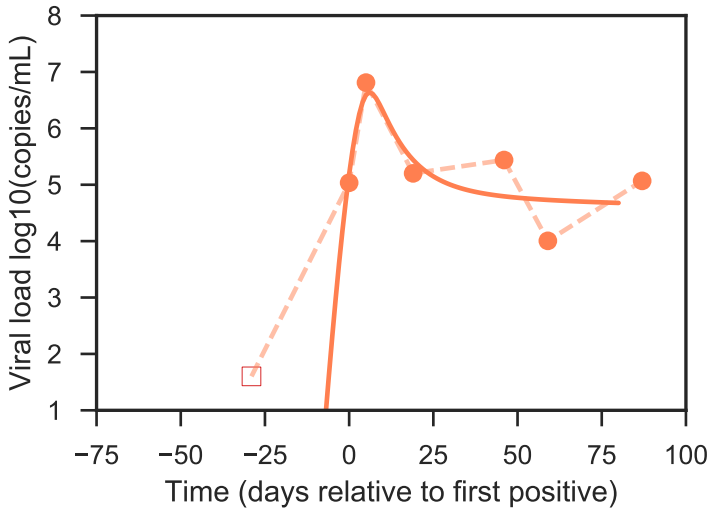

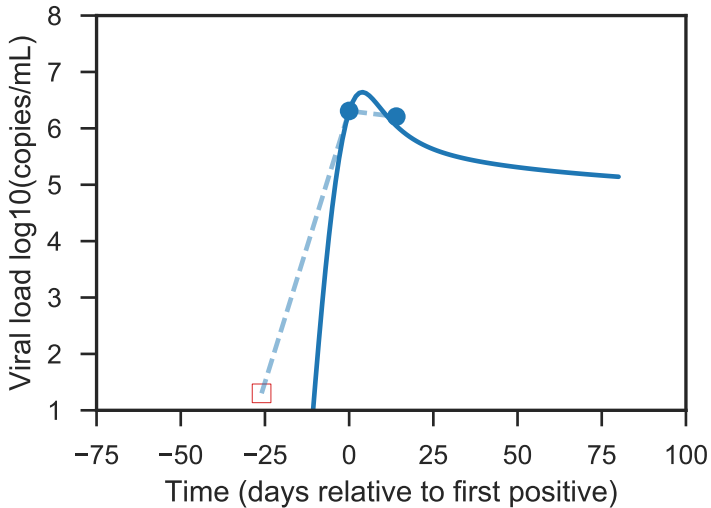

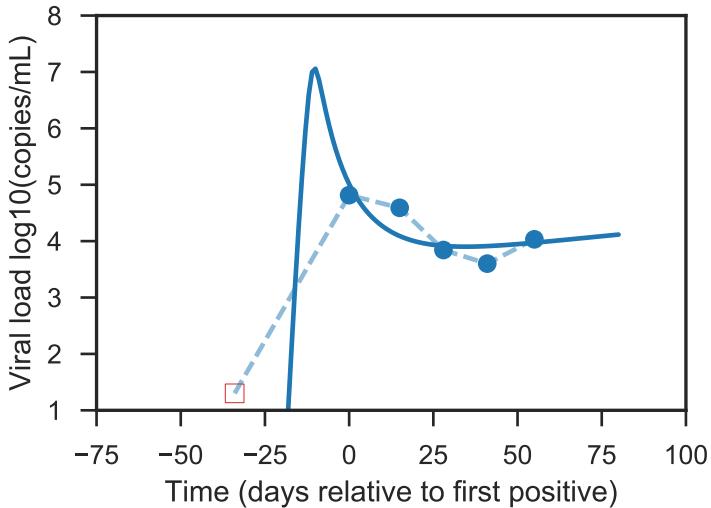

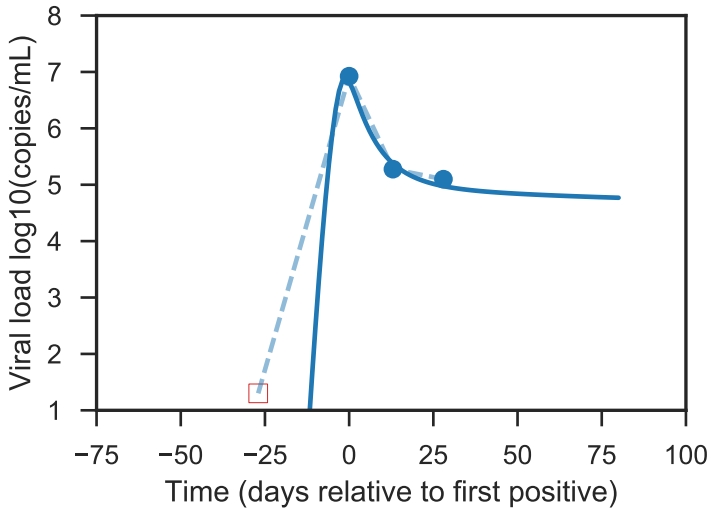



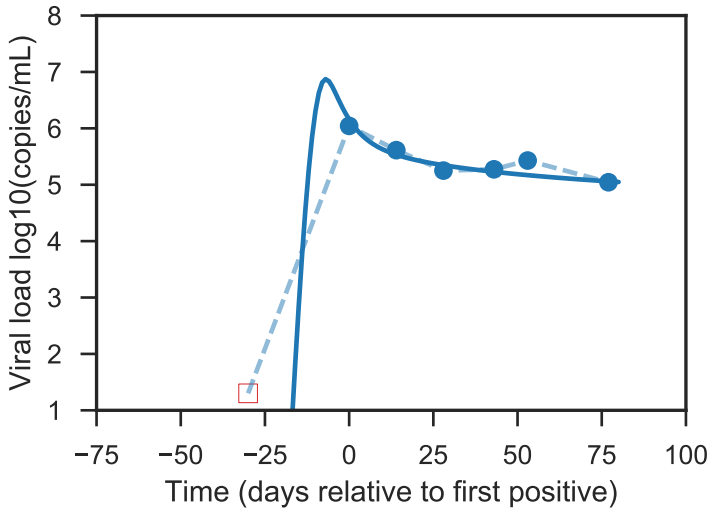

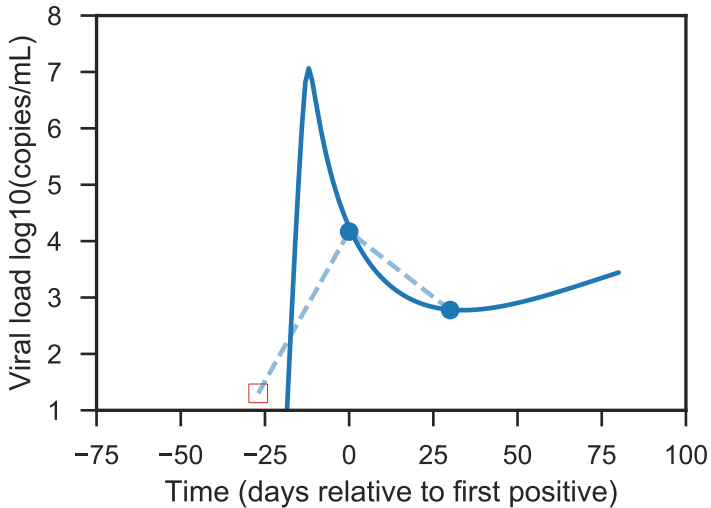

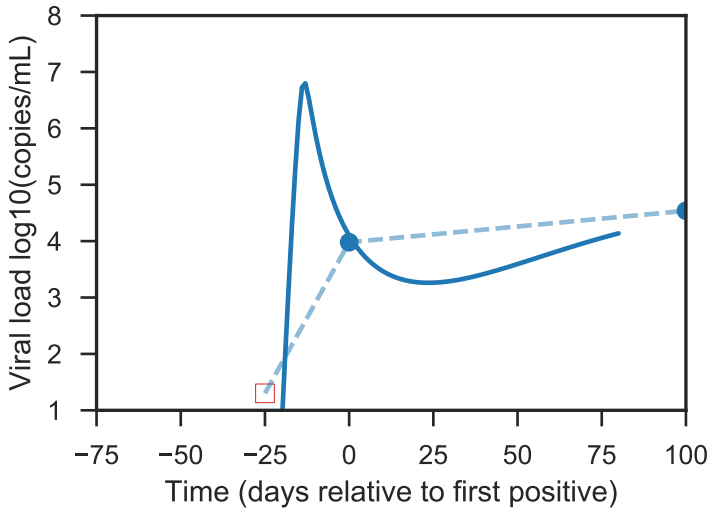

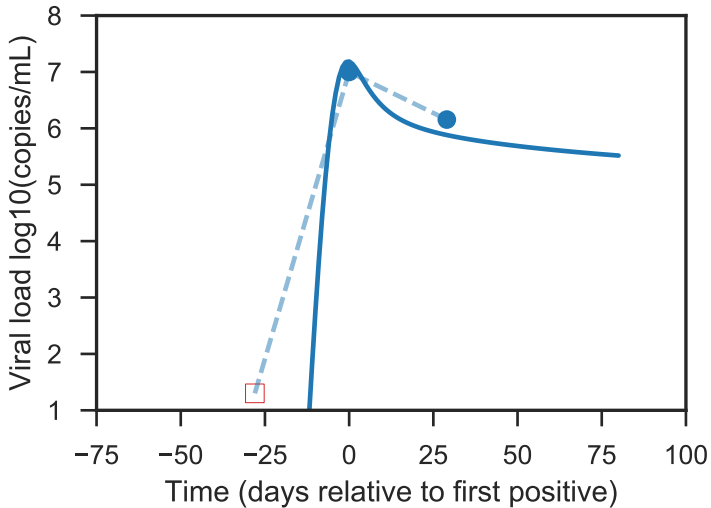

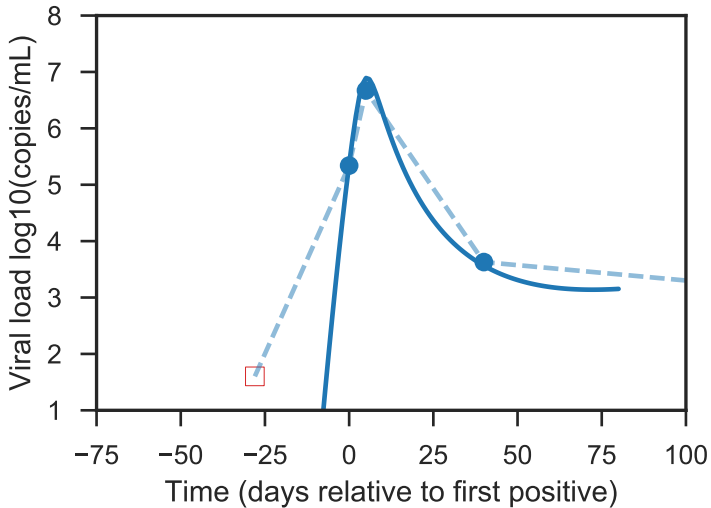

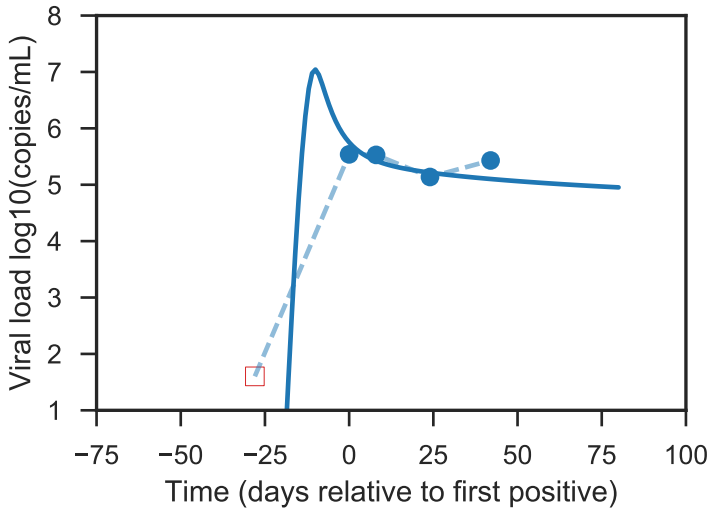

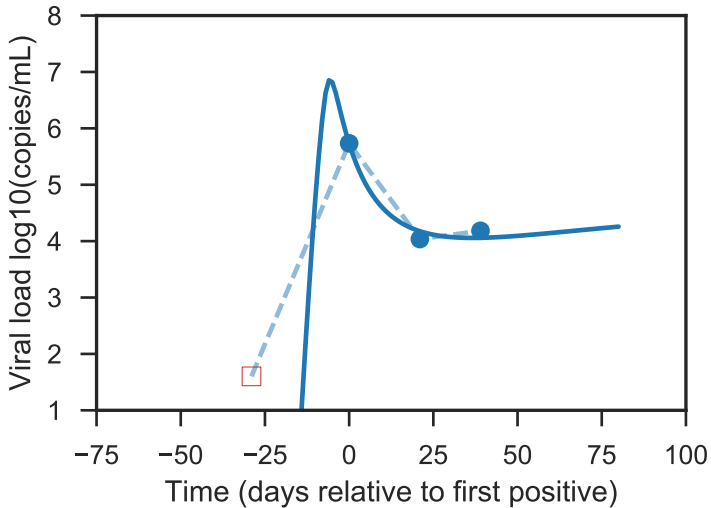

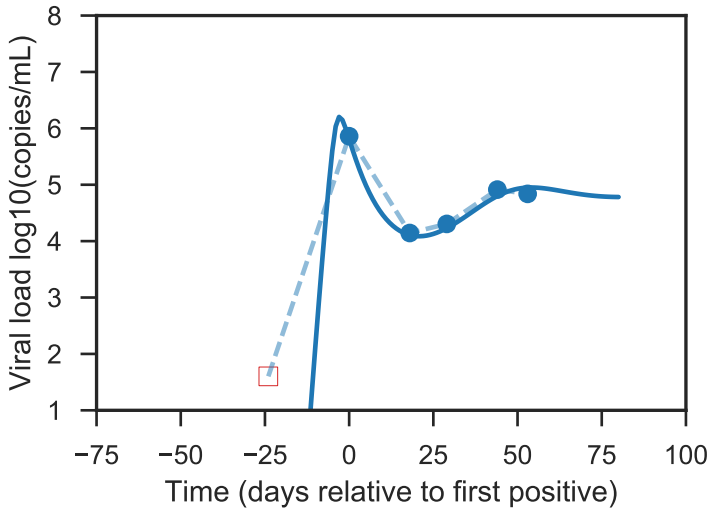



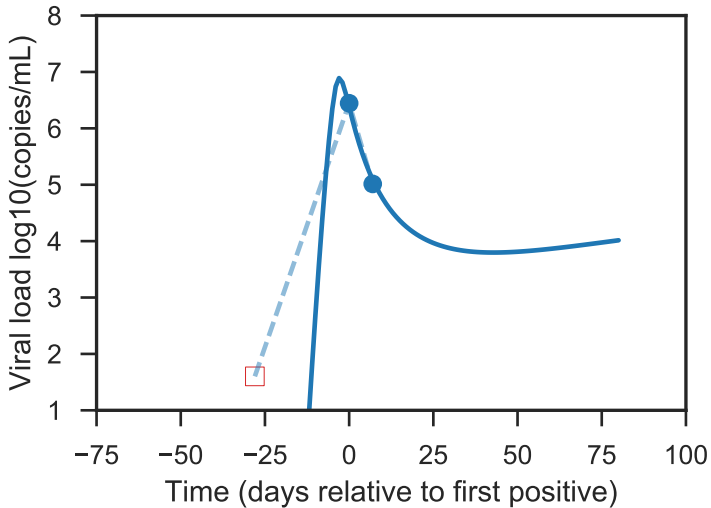

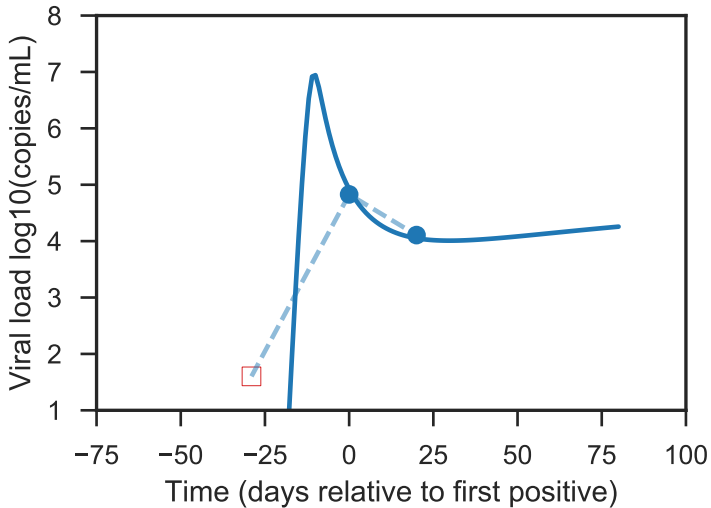

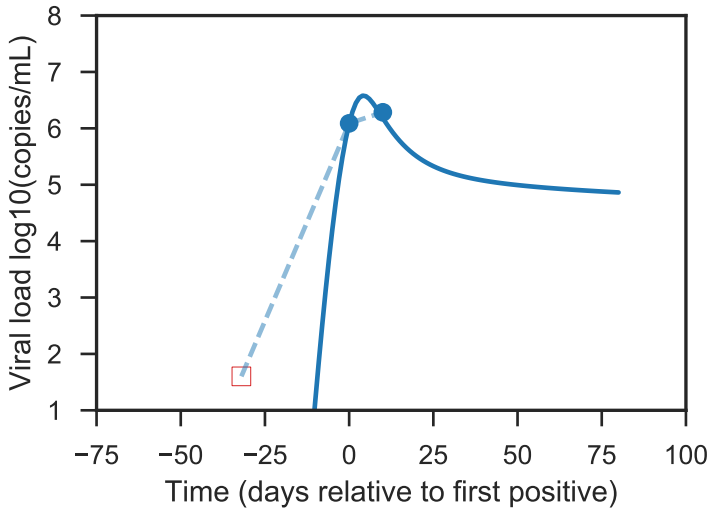

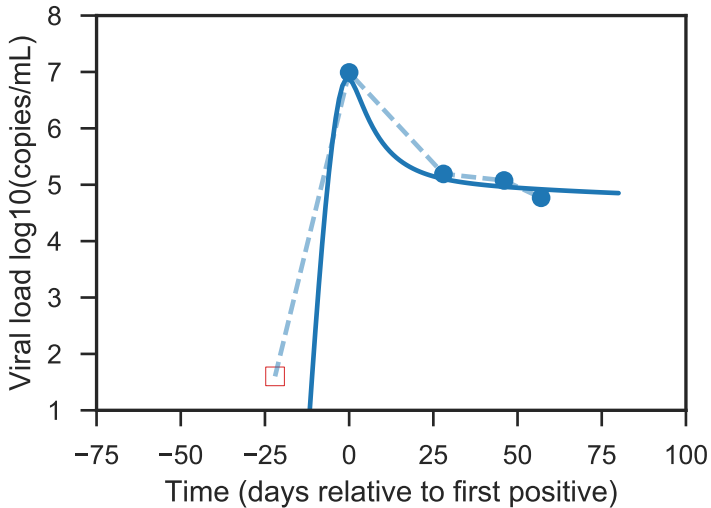

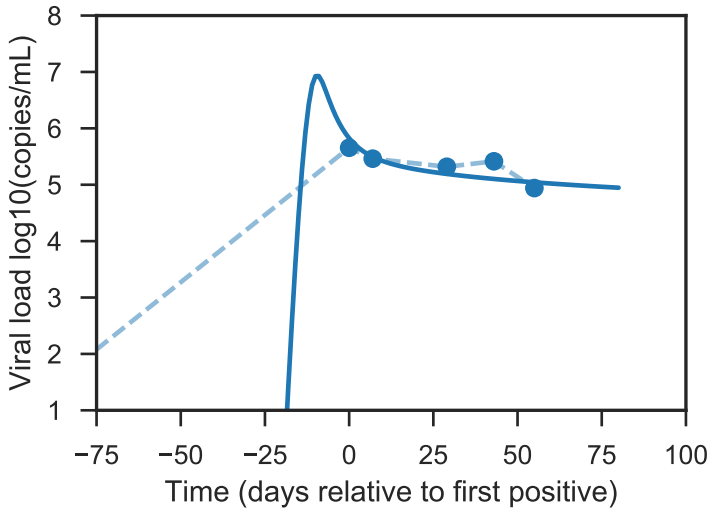

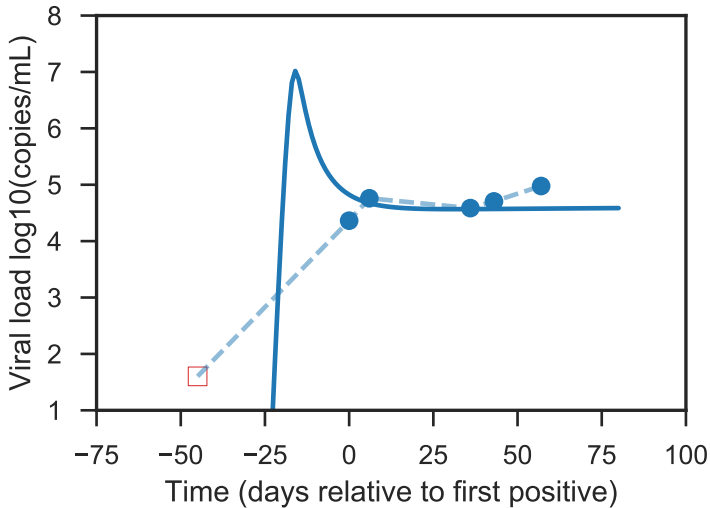

Supplement: 41467_2023_43384_MOESM5_ESM.pdf [file 41467_2023_43384_MOESM5_ESM.pdf]
