# Supplementary material for: High monoclonal neutralization titers reduced breakthrough HIV-1 viral loads in the Antibody Mediated Prevention trials
Source: PubMed Central journal article supplement (PMC10721814; doi:10.1038/s41467-023-43384-y), 2023-12-14
Supplement: 41467_2023_43384_MOESM1_ESM.pdf [file 41467_2023_43384_MOESM1_ESM.pdf]

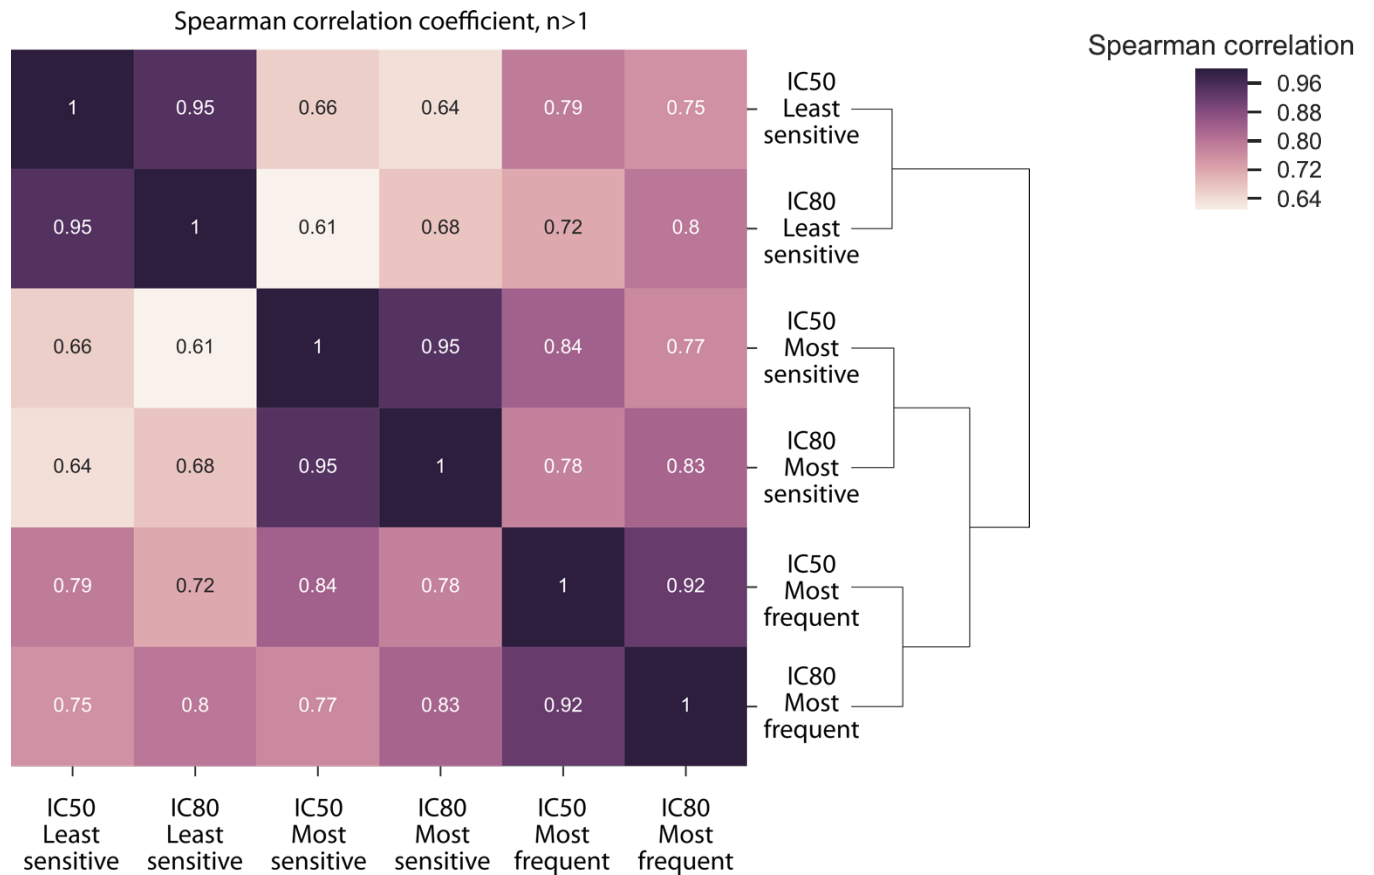

**Supplementary Fig. 1. Correlation of sensitivity within host.** Spearman correlation coefficient values for 6 acquired virus sensitivity measures for the 64 participants from whom more than 1 viral isolate was identified. Values are geometric means across experiments.

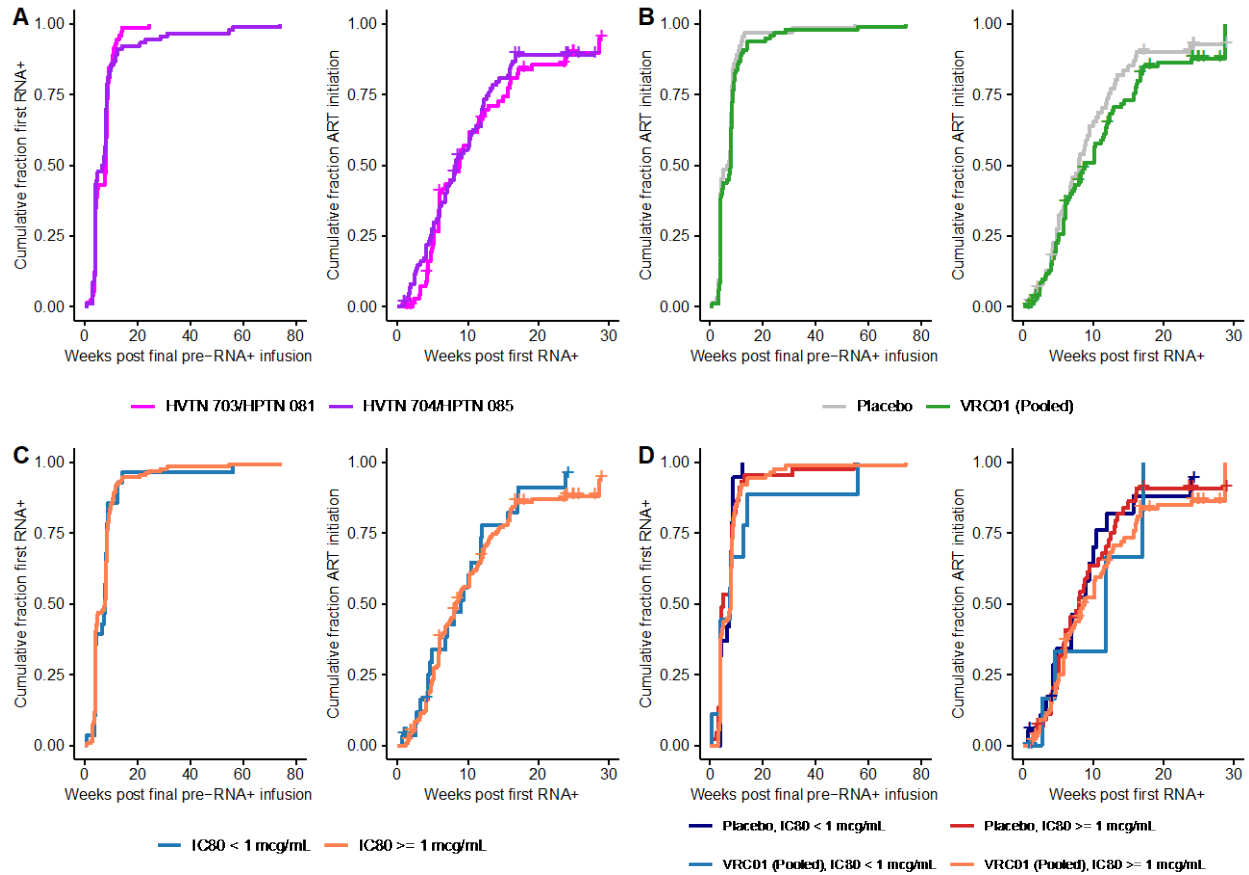

**Supplementary Fig. 2. Cumulative incidence curves by groups for times between last negative, first positive, and ART initiation.** The cumulative fraction of participants with a first RNA positive measurement by weeks post final pre-RNA+ infusion (left within each panel) and cumulative fraction of participants who had initiated ART by weeks post first RNA positive measurement (right within each panel) stratified by (A) trial, (B) treatment assignment, (C) VRC01 sensitivity category of acquired isolate with least sensitive IC80, and (D) the combination of treatment assignment and VRC01 sensitivity. Incidence curves were compared between strata using log-rank tests with all unadjusted p-values > 0.1. Statistics were calculated on the following numbers of participants: A) HVTN 703/HPTN 081 N=72, HVTN 704/HPTN 085 N=90; B) Placebo N=64, VRC01 Pooled = 98; C) IC80 < 1  $\mu\text{g/ml}$  = 28, IC80  $\geq$  1  $\mu\text{g/ml}$  = 134, D) Placebo, IC80 < 1  $\mu\text{g/ml}$  = 19; Placebo, IC80  $\geq$  1  $\mu\text{g/ml}$  = 45, VRC01 Pooled, IC80 < 1  $\mu\text{g/ml}$  = 9; VRC01 Pooled, IC80  $\geq$  1  $\mu\text{g/ml}$  = 89.

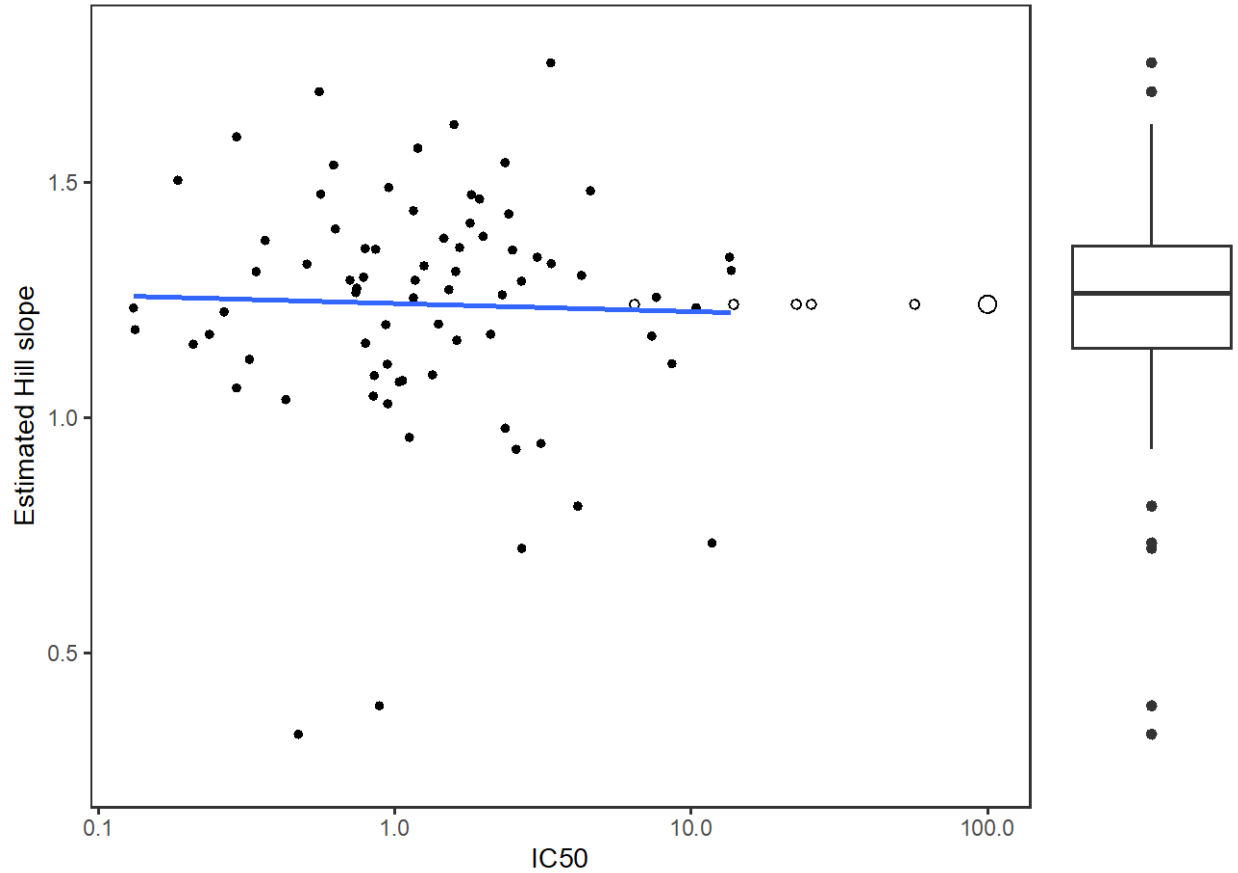

**Supplementary Fig. 3. Estimated Hill slope for AMP viruses.** The Hill slope was calculated from least sensitive viral IC50 and IC80 values using equation (3):  $h = -\ln(4) / \ln(\text{IC50}/\text{IC80})$ . Box plot indicates median  $\sim 1.3$  with IQR  $\sim 1.1$ - $1.4$ . Regression line depicts predicted mean Hill slope given IC50 values among sensitive viruses without IC80 censoring ( $\text{IC50} < 100$  and  $\text{IC80} < 100$ ). The 95% confidence interval of the predicted mean is depicted as the shaded region and the distribution of Hill slopes are depicted as a box plot on the right. As the regression line exhibited no trend, the overall mean of the Hill slope was used to impute Hill slopes for sensitive viruses with censored IC80 ( $\text{IC50} < 100$  and  $\text{IC80} > 100$ , open circles) and resistant viruses ( $\text{IC50} > 100$ , large open circle).

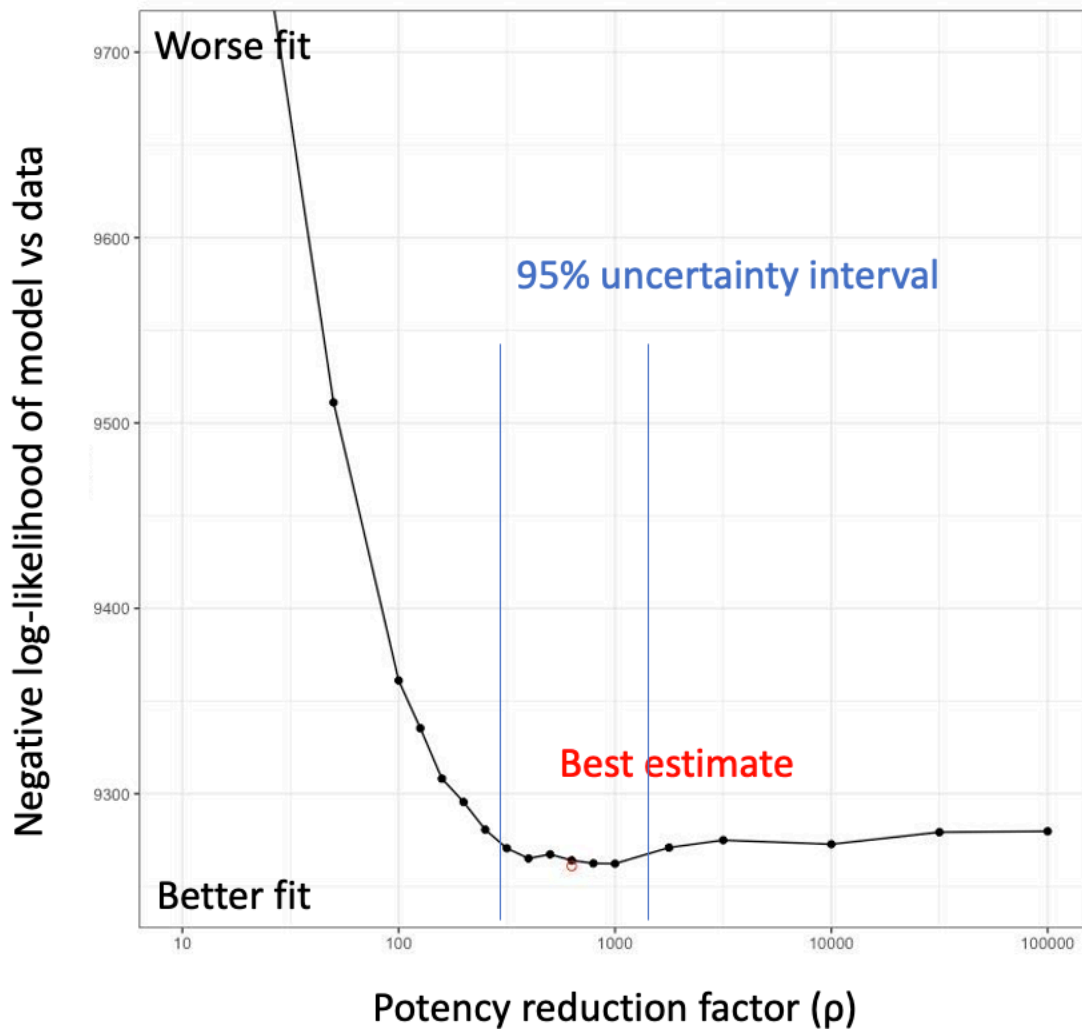

**Supplementary Fig. 4. Estimation of potency reduction factor.** The computed negative log-likelihood for varying values of the potency reduction factor, illustrating the best value having the highest likelihood and the uncertainty interval.

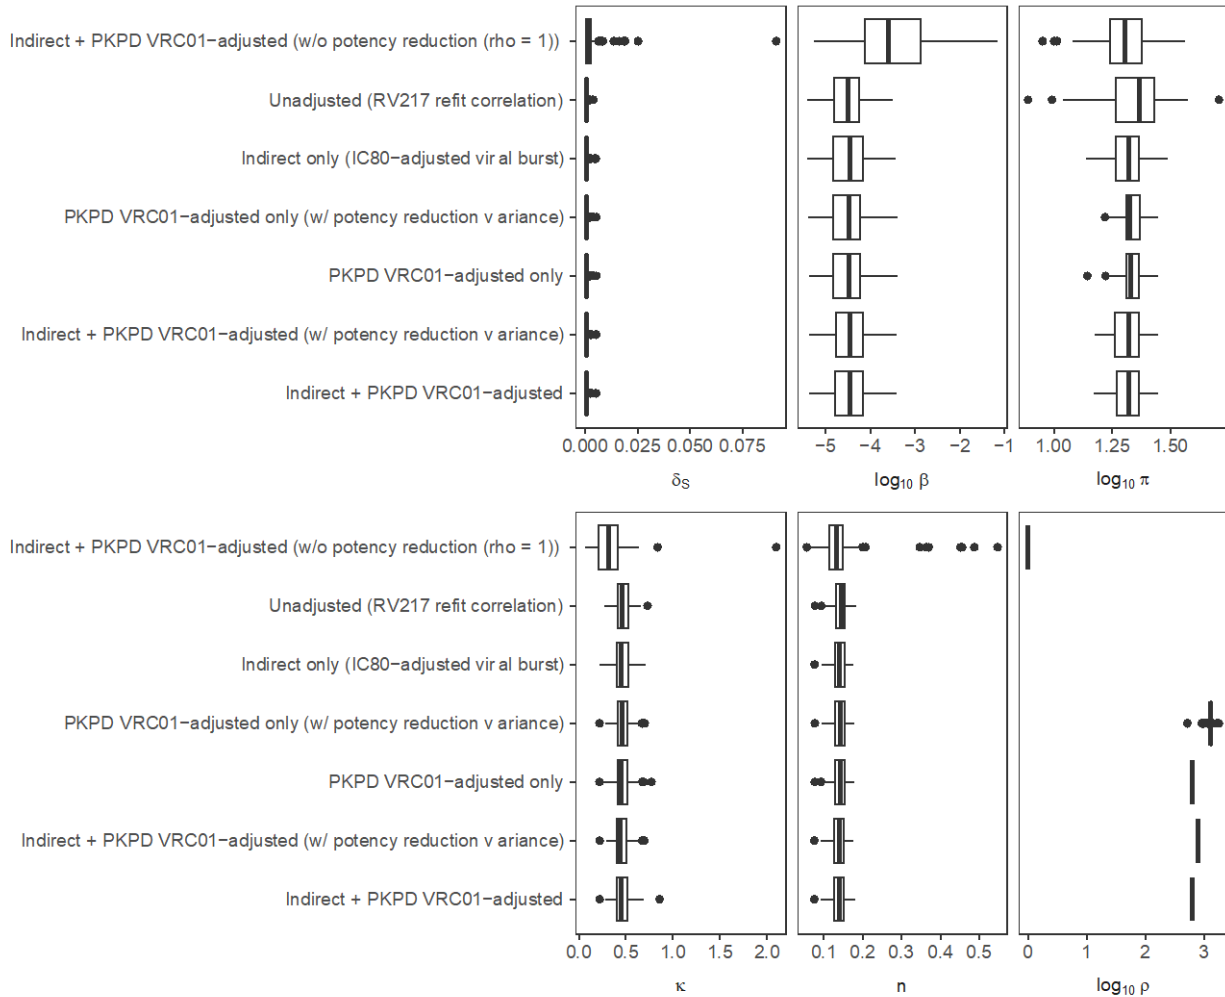

**Supplementary Fig. 5. Parameter estimates across models.** Values of estimated parameters are relatively constant across models. The notable difference is when potency reduction factor  $\rho$  is set to 1, infectivity ( $\log_{10} \beta$ ) is forced to be much higher to account for the observed viral loads despite high titers of VRC01. Box plots indicate median, IQR (box) and 1.5x IQR (fliers).

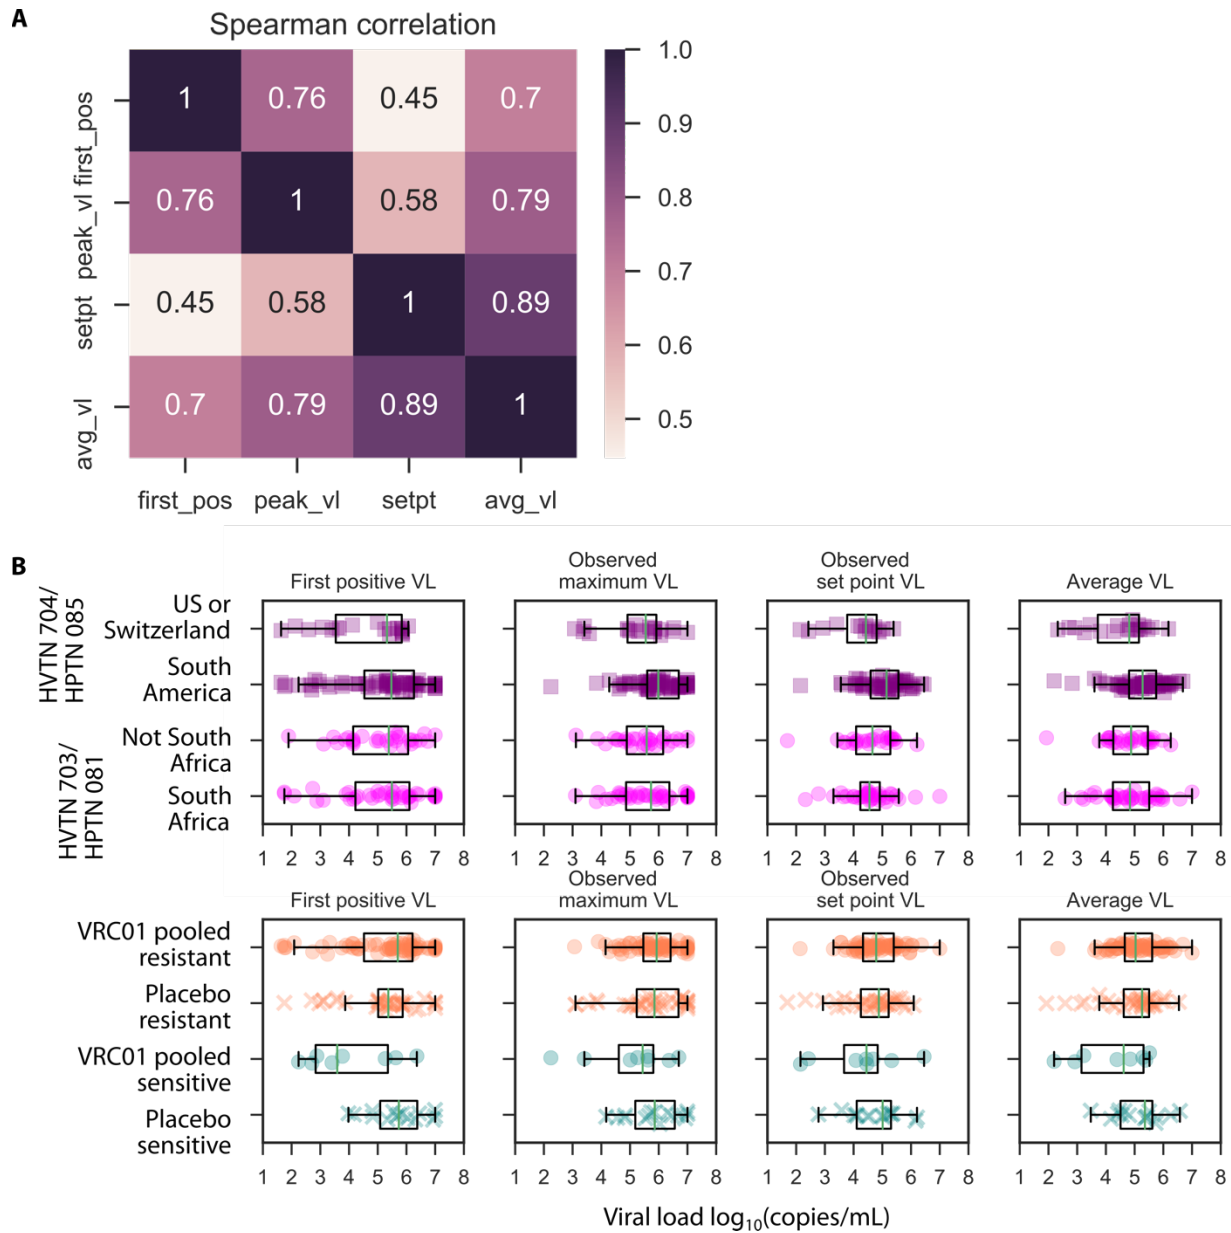

**Supplementary Fig. 6. Observed viral dynamic metrics.** A) Spearman correlation coefficient between observed viral load metrics. B) All comparisons of 4 observed viral load metrics by both geographic region (top, colors indicate trials) and VRC01 treatment/sensitivity groups (bottom, colors indicate sensitive vs resistant). Box plots indicate median, IQR (box) and 1.5x IQR (fliers).

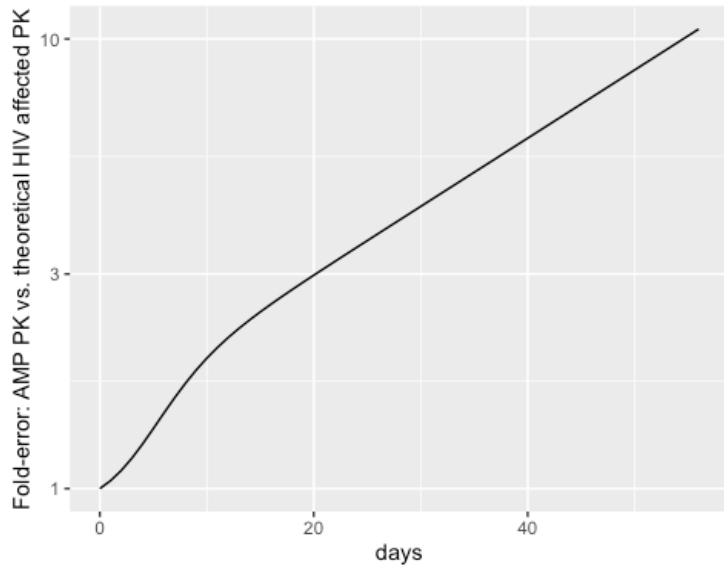

**Supplementary Fig. 7. Simulating PK with a faster terminal half-life in people who acquire HIV.** Based on data suggesting the bnAb PGDM1400 cleared 1.7x faster in PWH vs HIV-negative individuals, we simulated how much lower the VRC01 levels would be throughout dosing intervals if they followed the same decrease.

**Supplementary Table 1. Numbers of HIV acquisitions during the AMP trial.**

Data are grouped by treatment arm, acquired isolate information, and numbers of available longitudinal viral load measurements\*.

|                                                 | Placebo<br>(saline)<br>(N=64) | VRC01 (10 mg/kg)<br>(N=54) | VRC01 (30<br>mg/kg)<br>(N=44) | Overall<br>(N=162) |
|-------------------------------------------------|-------------------------------|----------------------------|-------------------------------|--------------------|
| <b>Region/Protocol</b>                          |                               |                            |                               |                    |
| <i>HVTN 703/HPTN 081</i>                        |                               |                            |                               |                    |
| South Africa                                    | 16 (25.0%)                    | 15 (27.8%)                 | 10 (22.7%)                    | 41 (25.3%)         |
| Not South Africa                                | 13 (20.3%)                    | 11 (20.4%)                 | 7 (15.9%)                     | 31 (19.1%)         |
| <i>HVTN 704/HPTN 085</i>                        |                               |                            |                               |                    |
| US/Switzerland                                  | 9 (14.1%)                     | 7 (13.0%)                  | 6 (13.6%)                     | 22 (13.6%)         |
| South America                                   | 26 (40.6%)                    | 21 (38.9%)                 | 21 (47.7%)                    | 68 (42.0%)         |
| <b>Synthesized isolates</b>                     |                               |                            |                               |                    |
| 1                                               | 38 (59.4%)                    | 36 (66.7%)                 | 24 (54.5%)                    | 98 (60.5%)         |
| 2                                               | 18 (28.1%)                    | 12 (22.2%)                 | 14 (31.8%)                    | 44 (27.2%)         |
| 3                                               | 6 (9.4%)                      | 4 (7.4%)                   | 5 (11.4%)                     | 15 (9.3%)          |
| 4                                               | 2 (3.1%)                      | 2 (3.7%)                   | 1 (2.3%)                      | 5 (3.1%)           |
| <b>Sensitivity (IC80<sup>^</sup>)</b>           |                               |                            |                               |                    |
| < 1 µg/mL (sensitive) <sup>¶</sup>              | 19 (29.7%)                    | 4 (7.4%)                   | 5 (11.4%)                     | 28 (17.3%)         |
| ≥ 1 µg/mL (resistant) <sup>¶</sup>              | 45 (70.3%)                    | 50 (92.6%)                 | 39 (88.6%)                    | 134 (82.7%)        |
| <b>Longitudinal VL observations<sup>#</sup></b> |                               |                            |                               |                    |
| 1                                               | 2 (3.1%)                      | 1 (1.9%)                   | 1 (2.3%)                      | 4 (2.5%)           |
| 2                                               | 17 (26.6%)                    | 10 (18.5%)                 | 14 (31.8%)                    | 41 (25.3%)         |
| 3                                               | 13 (20.3%)                    | 18 (33.3%)                 | 5 (11.4%)                     | 36 (22.2%)         |
| 4                                               | 11 (17.2%)                    | 10 (18.5%)                 | 8 (18.2%)                     | 29 (17.9%)         |
| > 4                                             | 21 (32.8%)                    | 15 (27.8%)                 | 16 (36.4%)                    | 52 (32.1%)         |

ART, antiretroviral therapy; IC80, 80% inhibitory concentration; VL, viral load.

\*There were 174 primary HIV-1 endpoints by Week 80 in the AMP trials. Of these 174, 12 were missing IC80 & IC50 data: 8 in HVTN 704/HPTN 085 and 4 in HVTN 703/HPTN 081. This table restricts to the 162 endpoints for which IC80/IC50 data were available.

<sup>^</sup>Sensitivity is reported for VRC01 against the least sensitive HIV-1 isolate if more than one isolate was synthesized.

<sup>¶</sup>We use a predefined threshold from the Statistical Analysis Plan of the AMP trials to define sensitive vs resistant.

<sup>#</sup>VL observations are defined as HIV-1 RNA PCR > 20 copies/ml. All measurements occur prior to ART initiation.



**Supplementary Table 2. AMP participants initiating ART after acquisition.**

Numbers and percentages of participants in each treatment assignment group, pooled across both trials, who initiated ART at any time of the study (viral load measurements made after this time were not used in the analysis).

| <b>Any ART initiation during study</b> | <b>Placebo (saline) (N=64)</b> | <b>VRC01 (10mg/kg) (N=54)</b> | <b>VRC01 (30mg/kg) (N=44)</b> | <b>Overall (N=162)</b> |
|----------------------------------------|--------------------------------|-------------------------------|-------------------------------|------------------------|
| No                                     | 8 (12.5%)                      | 11 (20.4%)                    | 8 (18.2%)                     | 27 (16.7%)             |
| Yes                                    | 56 (87.5%)                     | 43 (79.6%)                    | 36 (81.8%)                    | 135 (83.3%)            |

**Supplementary Table 3. Infusion timing vs diagnosis.**

Numbers of participants receiving infusions relative to diagnosis and first positive detection. Participants in the placebo group received infusions of saline.

| <b>Study Group</b> |          | <b>Overall</b> | <b>Infusion at/after diagnosis</b> | <b>Infusion at/after first positive</b> |
|--------------------|----------|----------------|------------------------------------|-----------------------------------------|
| Placebo            | IC80 < 1 | 19             | 11                                 | 12                                      |
|                    | IC80 ≥ 1 | 45             | 18                                 | 21                                      |
| VRC01 (Pooled)     | IC80 < 1 | 9              | 3                                  | 4                                       |
|                    | IC80 ≥ 1 | 89             | 49                                 | 56*                                     |
| Total              | -        | 162            | 81                                 | 93                                      |

\* One participant received two infusions following at/after first positive visit.

**Supplementary Table 4. Population pharmacokinetic parameter estimates for AMP study participant VRC01 levels.**

Abbreviations: %RSE: relative standard error of the fixed effect estimate, calculated as 100\* the ratio of the standard error to the estimated value; CV: coefficient of variation for random effect estimates, calculated as 100x the variance (stddev<sup>2</sup>) of the random effects distribution; R: Correlation coefficient between random effect estimates.

|                                                 | Parameter                                             | Estimate | %RSE  | 95% CI LBOUND | 95% CI UBOUND | %CV    |
|-------------------------------------------------|-------------------------------------------------------|----------|-------|---------------|---------------|--------|
| <b>Fixed effects</b>                            | CL (L/day): clearance from the central compartment    | 0.575    | 2.06  | 0.552         | 0.598         | –      |
|                                                 | Body weight influence on CL                           | 0.331    | 21.39 | 0.193         | 0.470         | –      |
|                                                 | Study influence on CL                                 | 0.111    | 24.99 | 0.057         | 0.165         | –      |
|                                                 | Vc (L): volume of the central compartment             | 3.532    | 4.46  | 3.223         | 3.840         | –      |
|                                                 | Q (L/day): inter-compartmental distribution clearance | 0.676    | 1.93  | 0.650         | 0.701         | –      |
|                                                 | Vp (L): volume of the peripheral compartment          | 4.749    | 2.12  | 4.552         | 4.946         | –      |
|                                                 | Study influence on Vp                                 | 0.165    | 16.41 | 0.112         | 0.218         | –      |
| <b>Standard Deviation of the Random Effects</b> | CL (L/day): clearance from the central compartment    | 0.172    | 5.62  | 0.153         | 0.191         | 17.19% |
|                                                 | Vc (L): volume of the central compartment             | 0.248    | 14.80 | 0.176         | 0.320         | 24.77% |
|                                                 | Q (L/day): inter-compartmental distribution clearance | 0.064    | 19.56 | 0.039         | 0.088         | 6.38%  |
|                                                 | Vp (L): volume of the peripheral compartment          | 0.145    | 7.97  | 0.123         | 0.168         | 14.55% |
| <b>Error Model Parameters</b>                   | Residual error (proportional)                         | 0.188    | 1.48  | 0.183         | 0.194         | 18.81% |

### Supplementary Table 5. Estimated viral load model parameters.

For four models, we provide the value of each estimated model parameter  $\theta$ , the standard deviation on that parameter ( $\omega_\theta$ ), and correlations between parameters  $r(\theta_1, \theta_2)$ . Relative standard errors of model estimates are provided in parentheses (RSE %). Values determined to be optimal are shown in red. These values are carried forward left to right for the following models and in some cases, values are refit (red in later columns). “Previous RV217” indicates our previously published mathematical modeling reported in Reeves et al. J Roy Soc Interface 2021. “Present RV217” indicates refitting that model with additional correlation parameters which adjusted some timing estimates ( $t_0$ , defined relative to first positive) slightly. “Indirect effects” indicates fitting the Present RV217 model to placebo group data from the AMP study including a covariate ( $b$ ) between viral burst and sensitivity. Note throughout  $\beta$  and  $\pi$  were Log10-transformed and normally distributed on the log scale.

Definitions and units for estimated mechanistic model [equation (5)] parameters are as follows: Estimated day of infection relative to first positive  $t_0$  [days], viral clearance rate  $\gamma$  [day<sup>-1</sup>], susceptible cell death rate  $\delta_S$  [day<sup>-1</sup>], viral infectivity  $\beta$  [ $\mu\text{L virus}^{-1} \text{day}^{-1}$ ], viral production rate  $\pi$  [virus cell<sup>-1</sup> day], infected cell removal rate  $\kappa$  [(cell/ $\mu\text{L}$ )<sup>-n</sup> day<sup>-1</sup>] – note the unit depends on the value of the power law term, Holte-Cardozo power law density dependent infected cell death exponent  $n$  [unitless]. For the population nonlinear mixed effects model, the data noise was also estimated as additive to log10 viral load such that  $\sigma_V$  is the standard deviation of the data with units of log10 copies/mL. The indirect fitness cost term  $b_\pi$  adjusts the population estimated viral production rate based on the acquired virus IC80 centered on the median value [equation (6)] so it carries the same units as  $\pi$  [virus cell<sup>-1</sup> day]. Each value for standard deviation (subscripted  $\omega_\theta$ ) carries the same units as its original parameter. Each value of correlation between parameters  $r(x, y)$  is unitless.

| Models:                                          | Previous RV217  | Present RV217       | Indirect effects | Indirect + direct effects + potency reduction |
|--------------------------------------------------|-----------------|---------------------|------------------|-----------------------------------------------|
| Parameter (see legend for definitions and units) | Estimated value | (% RSE of estimate) |                  |                                               |
| $t_0$                                            | 16.58           | 16.46 (14.10)       |                  |                                               |
| $\alpha_S$                                       | 38.26           |                     |                  |                                               |
| $\gamma$                                         | 23              |                     |                  |                                               |
| $\delta_S \times 10^4$                           | 6.77            |                     |                  |                                               |
| $\log_{10} \beta$                                | -4.33           |                     |                  |                                               |
| $\log_{10} \pi$                                  | 1.32            |                     |                  |                                               |
| $\kappa$                                         | 0.43            |                     |                  |                                               |
| $n$                                              | 0.14            |                     |                  |                                               |
| $\omega_{t_0}$                                   | 0.31            | 0.38 (28.72)        |                  |                                               |
| $\omega_{\delta_S}$                              | 1.37            |                     |                  |                                               |
| $\omega_\beta$                                   | 0.61            |                     |                  |                                               |
| $\omega_\kappa$                                  | 0.39            |                     |                  |                                               |
| $\omega_n$                                       | 0.26            |                     |                  |                                               |

|                                     |       |                |               |             |
|-------------------------------------|-------|----------------|---------------|-------------|
| $r(\delta_S, \delta_I)$             | -1    | -0.77 (18.92)  |               |             |
| $r(\log_{10} \beta, \kappa)$        | -0.86 | -0.71 (29.50)  |               |             |
| $r(\log_{10} \pi, \kappa)$          | -0.82 | 0.18 (539.78)  |               |             |
| $r(\log_{10} \beta, \delta_S)$      | 0.89  | 0.91 (21.11)   |               |             |
| $r(\log_{10} \pi, \delta_S)$        | 0.86  | -0.22 (395.19) |               |             |
| $r(\log_{10} \pi, \log_{10} \beta)$ | 0.83  | -0.41 (61.05)  |               |             |
| $\sigma_V$                          | 1.16  |                |               |             |
| $b_\pi$                             |       |                | -0.07 (40.54) |             |
| $\omega_\pi$                        | 0.26  |                | 0.14 (17.79)  |             |
| $\log_{10} \rho$                    |       |                |               | 2.80 (5.52) |

**Supplementary Table 6. Model selection analysis results.**

BICc = Corrected Bayesian Information Criterion; LogLik = Log-likelihood. Optimal models (lowest BICc) for placebo and VRC01-pooled participants are denoted by red.

| <b>Cohort</b>  | <b>Virus-adjusted</b> | <b>Model Description</b>                                           | <b>Analysis Model</b> | <b>BICc</b> | <b>LogLik</b> |
|----------------|-----------------------|--------------------------------------------------------------------|-----------------------|-------------|---------------|
| Placebo        | Fixed                 |                                                                    |                       |             |               |
| Placebo        | RV217                 | (Reeves et al., RSIF 2021)                                         | TRUE                  | 6073        | 6063          |
| Placebo        | Unadjusted            | Refit RV217 Variance                                               | FALSE                 | 6065        | 6034          |
| Placebo        | Unadjusted            | Refit RV217 Correlation                                            | TRUE                  | 6012        | 5977          |
| Placebo        | Unadjusted            | Refit RV217 Variance/Correlation                                   | FALSE                 | 6008        | 5965          |
| Placebo        | Adjusted              | Cat. IC80-adjusted Holte power                                     | FALSE                 | 5989        | 5975          |
| Placebo        | Adjusted              | IC80-adjusted infected cell death                                  | FALSE                 | 5987        | 5979          |
| Placebo        | Adjusted              | Cat. IC80-adjusted infectivity                                     | FALSE                 | 5986        | 5972          |
| Placebo        | Adjusted              | Cat. IC80-adjusted viral burst                                     | FALSE                 | 5986        | 5972          |
| Placebo        | Adjusted              | IC80-adjusted Holte power                                          | FALSE                 | 5985        | 5977          |
| Placebo        | Adjusted              | Cat. IC80-adjusted infected cell death                             | FALSE                 | 5985        | 5971          |
| Placebo        | Adjusted              | IC80-adjusted infectivity                                          | FALSE                 | 5976        | 5968          |
| <b>Placebo</b> | <b>Adjusted</b>       | <b>IC80-adjusted viral burst</b>                                   | <b>TRUE</b>           | <b>5975</b> | <b>5966</b>   |
| VRC01          | PKPD                  | Unadjusted (RV217 refit correlation)                               | FALSE                 | 9368        | 9368          |
| VRC01          | PKPD                  | Indirect only (IC80-adjusted viral burst)                          | FALSE                 | 9367        | 9367          |
| VRC01          | PKPD                  | PKPD VRC01-adjusted only (w/ potency reduction variance)           | FALSE                 | 9284        | 9273          |
| VRC01          | PKPD                  | PKPD VRC01-adjusted only                                           | FALSE                 | 9276        | 9270          |
| VRC01          | PKPD                  | Indirect + PKPD VRC01-adjusted (no potency reduction, $\rho = 1$ ) | FALSE                 | 12533       | 12533         |
| VRC01          | PKPD                  | Indirect + PKPD VRC01-adjusted (w/ potency reduction variance)     | FALSE                 | 9276        | 9265          |
| <b>VRC01</b>   | <b>PKPD</b>           | <b>Indirect + PKPD VRC01-adjusted</b>                              | <b>TRUE</b>           | <b>9267</b> | <b>9261</b>   |



**Supplementary Table 8. Post-acquisition positive viral load measurements.**

Viral load measurements by study visit (v.x and v.y encode first positive viral load and confirmatory positive viral load measurements).

| <b>Visit Number</b>        | <b>Total Positive*</b> | <b>Total</b> | <b>Scheduled Day</b> | <b>Days Relative to Diagnosis mean (range)</b> | <b>Days Relative to First positive mean (range)</b> |
|----------------------------|------------------------|--------------|----------------------|------------------------------------------------|-----------------------------------------------------|
| Retrospective <sup>^</sup> | 31                     | 32           | NA                   | -34.8 (-125, -5)                               | 0.9 (0, 29)                                         |
| v.x                        | 160                    | 160          | Diagnosis            | 0 (0, 0)                                       | 6.1 (0, 125)                                        |
| v.y                        | 145                    | 148          | D14                  | 13.2 (2, 63)                                   | 18.9 (2, 140)                                       |
| 31                         | 67                     | 67           | D28                  | 27.9 (24, 32)                                  | 34.4 (24, 84)                                       |
| 32                         | 63                     | 63           | D42                  | 42.2 (38, 46)                                  | 50.9 (38, 143)                                      |
| 33                         | 47                     | 47           | D56                  | 56 (52, 60)                                    | 67.2 (52, 181)                                      |
| 34                         | 29                     | 29           | D84                  | 85.6 (77, 98)                                  | 90.4 (77, 119)                                      |
| 35                         | 11                     | 11           | D168                 | 167.4 (140, 180)                               | 176.2 (166, 203)                                    |
| Off-schedule               | 37                     | 51           |                      | 44.5 (4, 175)                                  | 54.2 (5, 175)                                       |
| Total                      | 590                    | 608          | -                    | -                                              | -                                                   |

\* Positive VL measurement defined as HIV-1 RNA PCR above the lower limit of quantification.

<sup>^</sup> Measurements were retrospectively made on samples collected prior to first positive, some were indeed already positive.
